# Supplementary material for: Three-component N-alkenylation of azoles with alkynes and iodine(III) electrophile: synthesis of multisubstituted N-vinylazoles
Source: publisher site journal article supplement (doi:10.3762/bjoc.20.79), 2024-04-22

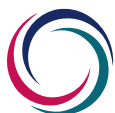

## Supporting Information

for

### Three-component *N*-alkenylation of azoles with alkynes and iodine(III) electrophile: synthesis of multisubstituted *N*-vinylazoles

Jun Kikuchi, Roi Nakajima and Naohiko Yoshikai

*Beilstein J. Org. Chem.* **2024**, *20*, 891–897. [doi:10.3762/bjoc.20.79](https://doi.org/10.3762/bjoc.20.79)

### Experimental procedures and characterization data of new compounds

## Contents

|                                                         |     |
|---------------------------------------------------------|-----|
| 1. Materials and methods .....                          | S2  |
| 2. General procedures and product characterization..... | S4  |
| 3. Product transformations.....                         | S24 |
| 4. References.....                                      | S29 |
| 5. NMR Spectra .....                                    | S30 |

## 1. Materials and methods

**General.** All reactions dealing with air- or moisture-sensitive compounds were performed by standard Schlenk technique in oven-dried reaction vessels under an argon atmosphere. Analytical thin-layer chromatography (TLC) was performed on Merck 60 F254 silica gel plates. Flash chromatography was performed using 40–50  $\mu\text{m}$  silica gel (silica gel 60N, Kanto Chemical).  $^1\text{H}$ ,  $^{13}\text{C}\{^1\text{H}\}$ , and  $^{19}\text{F}\{^1\text{H}\}$  NMR spectra were recorded on JEOL JNM-ECA600 (600 MHz) spectrometers.  $^1\text{H}$  and  $^{13}\text{C}\{^1\text{H}\}$  NMR spectra are reported in parts per million (ppm) downfield from an internal standard, tetramethylsilane (0 ppm) and  $\text{CHCl}_3$  (77.0 ppm), respectively.  $^{19}\text{F}\{^1\text{H}\}$  NMR spectra are referenced to external standard ( $\text{CF}_3\text{CO}_2\text{H}$ ,  $-76.6$  ppm). Structural assignments were made with additional information from the NOESY experiment. Melting points were determined with a MPA100 OptiMelt apparatus. High-resolution mass spectra (HRMS) were recorded on a JEOL JMS-700 spectrometer equipped with a double-focusing mass analyzer or a JMS-T100GC spectrometer equipped with a TOF mass analyzer.

**Materials.** Unless otherwise noted, commercial reagents were purchased from TCI, Kanto Chemical, Sigma-Aldrich, or other commercial suppliers and used as received. Anhydrous MeCN was purchased from FUJIFILM Wako Pure Chemical and was used as received. DMF and toluene were distilled over  $\text{CaH}_2$  and stored under argon in the presence of molecular sieves 4 Å. 3,3-Bis(trifluoromethyl)-1 $\lambda^3$ -benzo[*d*][1,2]iodaoxol-1(3*H*)-yl trifluoromethanesulfonate (benziodoxole triflate, BXT, **1**)<sup>1</sup> and alkynes **3c–f**<sup>2</sup> and **3i**<sup>3</sup> were prepared according to the literature procedures and spectral data for these compounds showed good agreement with the literature data.



## 2. General procedures and product characterization

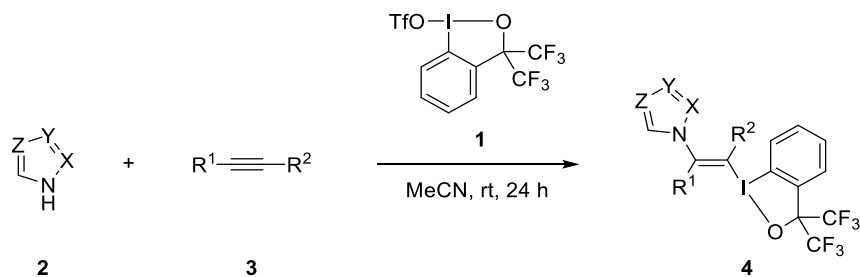

**General procedure:** Under an argon atmosphere, a 4 mL vial equipped with a magnetic stir bar was charged sequentially with azole **2** (0.50 mmol, 5.0 equiv), alkyne **3** (0.10 mmol), and MeCN (0.5 mL), followed by the addition of **1** (103.6 mg, 0.20 mmol, 2.0 equiv). The resulting mixture was stirred at room temperature for 24 h. Saturated Na<sub>2</sub>CO<sub>3</sub> aq. (4 mL) was added, and then the mixture was extracted with EtOAc (5 mL × 3). The combined organic layer was washed with H<sub>2</sub>O (5 mL) and brine (5 mL), dried over Na<sub>2</sub>SO<sub>4</sub>, and concentrated under reduced pressure. The residue was purified by flash chromatography on silica gel to afford the desired product.

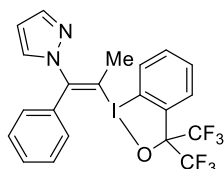

**(E)-1-(2-(3,3-Bis(trifluoromethyl)-1,2-iodaoxol-1(3H)-yl)-1-phenylprop-1-en-1-yl)-1H-pyrazole (4aa):** Synthesized by the general procedure (42.5 mg, 77%); yellow solid; *R<sub>f</sub>* 0.18 (hexane/EtOAc = 1/1); m.p. 108.1-110.3 °C; <sup>1</sup>H NMR (600 MHz, CDCl<sub>3</sub>) δ 7.86 (d, *J* = 7.2 Hz, 1H), 7.75 (d, *J* = 1.2 Hz, 1H), 7.69-7.64 (m, 3H), 7.40 (tt, *J* = 7.2 Hz, 1.2 Hz, 1H), 7.33-7.29 (m, 2H), 7.26-7.25 (m, 1H), 7.15-7.12 (m, 2H), 6.38 (dd, *J* = 2.4 Hz, 1.8 Hz, 1H), 2.83 (s, 3H); <sup>13</sup>C {<sup>1</sup>H} NMR (151 MHz, CDCl<sub>3</sub>) δ 148.0, 141.1, 137.5, 132.4, 131.7, 131.6, 130.6, 130.54, 130.49, 128.94, 12.89, 127.3, 123.8 (q, *J*<sub>C-F</sub> = 291.7 Hz), 116.5, 110.7, 107.1, 81.4-80.6 (m), 24.8; <sup>19</sup>F {<sup>1</sup>H} NMR (565 MHz, CDCl<sub>3</sub>) δ -76.0; HRMS (FAB) *m/z*: [M + H]<sup>+</sup> calcd for C<sub>21</sub>H<sub>16</sub>F<sub>6</sub>IN<sub>2</sub>O 553.0206; found, 553.0233.

**1 mmol-scale synthesis of 4aa:** Under an argon atmosphere, a 20 mL two-necked flask equipped with a magnetic stir bar was charged sequentially with **2a** (340.4 mg, 5.0 mmol, 5.0 equiv), **3a** (116.2 mg, 1.0 mmol), and MeCN (5.0 mL), followed by the addition of **1** (1.04 g, 2.0 mmol, 2.0 equiv). The resulting mixture was stirred at room temperature for 24 h. Saturated Na<sub>2</sub>CO<sub>3</sub> aq. (5 mL) was added, and then the mixture was extracted with EtOAc (15 mL × 3). The combined organic layer was washed with H<sub>2</sub>O (15 mL) and brine (15 mL), dried over Na<sub>2</sub>SO<sub>4</sub>, and concentrated under reduced pressure. The residue was purified by flash chromatography on silica gel to afford **4aa** (375.6 mg, 68%).

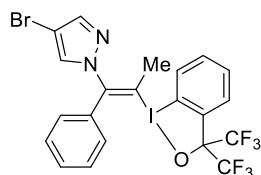

**(E)-1-(2-(3,3-Bis(trifluoromethyl)-1λ<sup>3</sup>-benzo[d][1,2]iodaoxol-1(3H)-yl)-1-phenylprop-1-en-1-yl)-4-bromo-1H-pyrazole (4ba):** Synthesized by the general procedure (58.1 mg, 92%); white solid; *R<sub>f</sub>* 0.33 (hexane/EtOAc = 2/1); m.p. 40.4-42.1 °C; <sup>1</sup>H NMR (600 MHz, CDCl<sub>3</sub>) δ 7.86 (d, *J* = 6.0 Hz, 1H), 7.70 (s, 1H), 7.68-7.63 (m, 3H), 7.42-7.38 (m, 1H), 7.33-7.29 (m, 2H), 7.27 (s, 1H), 7.13 (d, *J* = 7.8 Hz, 2H), 2.81 (s, 3H); <sup>13</sup>C{<sup>1</sup>H} NMR (151 MHz, CDCl<sub>3</sub>) δ 147.2, 141.7, 136.9, 132.5, 131.6, 131.5, 130.8, 130.67, 130.63, 129.1, 128.9, 127.3, 123.8 (q, *J*<sub>C-F</sub> = 291.7 Hz), 117.7, 110.5, 95.6, 81.2-80.8 (m), 24.7; <sup>19</sup>F{<sup>1</sup>H} NMR (565 MHz, CDCl<sub>3</sub>) δ -75.9; HRMS (FAB) *m/z*: [M + H]<sup>+</sup> calcd for C<sub>21</sub>H<sub>15</sub>BrF<sub>6</sub>IN<sub>2</sub>O 630.9311; found, 630.9306.

**1 mmol-scale synthesis of 4ba:** Under an argon atmosphere, a 20 mL two-necked flask equipped with a magnetic stir bar was charged sequentially with **2b** (734.9 mg, 5.0 mmol, 5.0 equiv), **3a** (116.2 mg, 1.0 mmol), and MeCN (5.0 mL), followed by the addition of **1** (1.04 g, 2.0 mmol, 2.0 equiv). The resulting mixture was stirred at room temperature for 24 h. Saturated Na<sub>2</sub>CO<sub>3</sub> aq. (5 mL) was added, and then the mixture was extracted with EtOAc (15 mL × 3).

The combined organic layer was washed with H<sub>2</sub>O (15 mL) and brine (15 mL), dried over Na<sub>2</sub>SO<sub>4</sub>, and concentrated under reduced pressure. The residue was purified by flash chromatography on silica gel to afford **4ba** (467.1 mg, 74%).

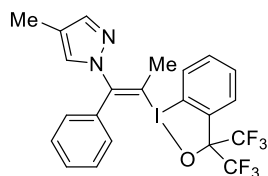

**(E)-1-(2-(3,3-Bis(trifluoromethyl)-1λ<sup>3</sup>-benzo[d][1,2]iodaoxol-1(3H)-yl)-1-phenylprop-1-en-1-yl)-4-methyl-1H-pyrazole (4ca):** Synthesized by the general procedure (21.5 mg, 38%); white solid; *R<sub>f</sub>* 0.21 (hexane/EtOAc = 1/1); m.p. 112.5-114.5 °C; <sup>1</sup>H NMR (600 MHz, CDCl<sub>3</sub>) δ 7.85 (d, *J* = 6.6 Hz, 1H), 7.70-7.62 (m, 3H), 7.55 (s, 1H), 7.39 (t, *J* = 7.8 Hz, 1H), 7.31 (t, *J* = 7.8 Hz, 2H), 7.13 (d, *J* = 7.8 Hz, 2H), 6.99 (s, 1H), 2.84 (s, 3H), 2.07 (s, 3H); <sup>13</sup>C{<sup>1</sup>H} NMR (151 MHz, CDCl<sub>3</sub>) δ 148.1, 142.2, 137.7, 132.4, 131.6, 130.6, 130.52, 130.50, 130.2, 129.0, 128.9, 127.3, 123.9 (q, *J* = 294.1 Hz), 117.8, 115.2, 110.6, 81.4-81.0 (m), 24.8, 8.8; <sup>19</sup>F{<sup>1</sup>H} NMR (565 MHz, CDCl<sub>3</sub>) δ -76.0; HRMS (FAB) *m/z*: [M + H]<sup>+</sup> calcd for C<sub>22</sub>H<sub>18</sub>F<sub>6</sub>IN<sub>2</sub>O 567.0363; found, 567.0376.

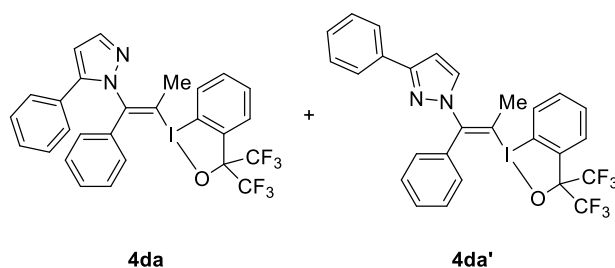

**(E)-1-(2-(3,3-Bis(trifluoromethyl)-1λ<sup>3</sup>-benzo[d][1,2]iodaoxol-1(3H)-yl)-1-phenylprop-1-en-1-yl)-5-phenyl-1H-pyrazole (4da) and (E)-1-(2-(3,3-Bis(trifluoromethyl)-1λ<sup>3</sup>-benzo[d][1,2]iodaoxol-1(3H)-yl)-1-phenylprop-1-en-1-yl)-3-phenyl-1H-pyrazole (4da'):** Synthesized by the general procedure and obtained as regioisomeric mixtures (52.8 mg, 84%, ratio = 7/3 as determined by <sup>1</sup>H NMR), which were separated by column chromatography on

silica gel; the structural assignments for the regioisomers were made by NOESY analysis (see below); **4da**: white solid;  $R_f$  0.37 (hexane/EtOAc = 1/1); m.p. 170.0-172.4 °C;  $^1\text{H}$  NMR (600 MHz,  $\text{CDCl}_3$ )  $\delta$  7.85 (d,  $J$  = 7.2 Hz, 1H), 7.79 (d,  $J$  = 1.8 Hz, 1H), 7.65 (t,  $J$  = 7.2 Hz, 1H), 7.55 (t,  $J$  = 6.6 Hz, 1H), 7.41-7.35 (m, 2H), 7.33 (t,  $J$  = 7.5 Hz, 2H), 7.26-7.21 (m, 3H), 7.13 (t,  $J$  = 7.5 Hz, 2H), 7.01-6.97 (m, 2H), 6.48 (d,  $J$  = 1.8 Hz, 1H), 2.40 (s, 3H);  $^{13}\text{C}\{^1\text{H}\}$  NMR (151 MHz,  $\text{CDCl}_3$ )  $\delta$  148.6, 145.1, 141.2, 137.1, 132.6, 131.5, 130.6, 130.1, 130.0, 128.9, 128.6, 128.5, 128.3, 128.2, 127.4, 123.8 (q,  $J_{\text{C-F}}$  = 292.0 Hz), 123.0, 110.7, 106.9, 81.2-80.8 (m), 24.3;  $^{19}\text{F}\{^1\text{H}\}$  NMR (565 MHz,  $\text{CDCl}_3$ )  $\delta$  -76.0; HRMS (FAB)  $m/z$ :  $[\text{M} + \text{H}]^+$  calcd for  $\text{C}_{27}\text{H}_{20}\text{F}_6\text{IN}_2\text{O}$  629.0519; found, 629.0535.; **4da'**: white solid;  $R_f$  0.45 (hexane/EtOAc = 1/1); m.p. 181.9-184.2 °C;  $^1\text{H}$  NMR (600 MHz,  $\text{CDCl}_3$ )  $\delta$  7.90-7.88 (m, 2H), 7.88-7.85 (m, 1H), 7.74-7.72 (m, 1H), 7.70-7.64 (m, 2H), 7.46 (t,  $J$  = 7.8 Hz, 2H), 7.42 (tt,  $J$  = 7.8 Hz, 1.2 Hz, 1H), 7.38 (tt,  $J$  = 7.8 Hz, 1.8 Hz, 1H), 7.33 (t,  $J$  = 7.8 Hz, 2H), 7.21-7.19 (m, 2H), 7.19 (d,  $J$  = 1.8 Hz, 1H), 6.67 (d,  $J$  = 2.4 Hz, 1H), 3.00 (s, 3H);  $^{13}\text{C}\{^1\text{H}\}$  NMR (151 MHz,  $\text{CDCl}_3$ )  $\delta$  153.1, 147.5, 137.5, 133.3, 132.4, 131.7, 130.6, 130.5, 129.2, 129.0, 128.8, 128.6, 127.3, 125.9, 123.9 (q,  $J_{\text{C-F}}$  = 295.7 Hz), 115.7, 110.7, 104.6, 81.3-80.9 (m), 25.2;  $^{19}\text{F}\{^1\text{H}\}$  NMR (565 MHz,  $\text{CDCl}_3$ )  $\delta$  -76.0; HRMS (FAB)  $m/z$ :  $[\text{M} + \text{H}]^+$  calcd for  $\text{C}_{27}\text{H}_{20}\text{F}_6\text{IN}_2\text{O}$  629.0519; found, 629.0535.

# NOESY spectra of **4da**

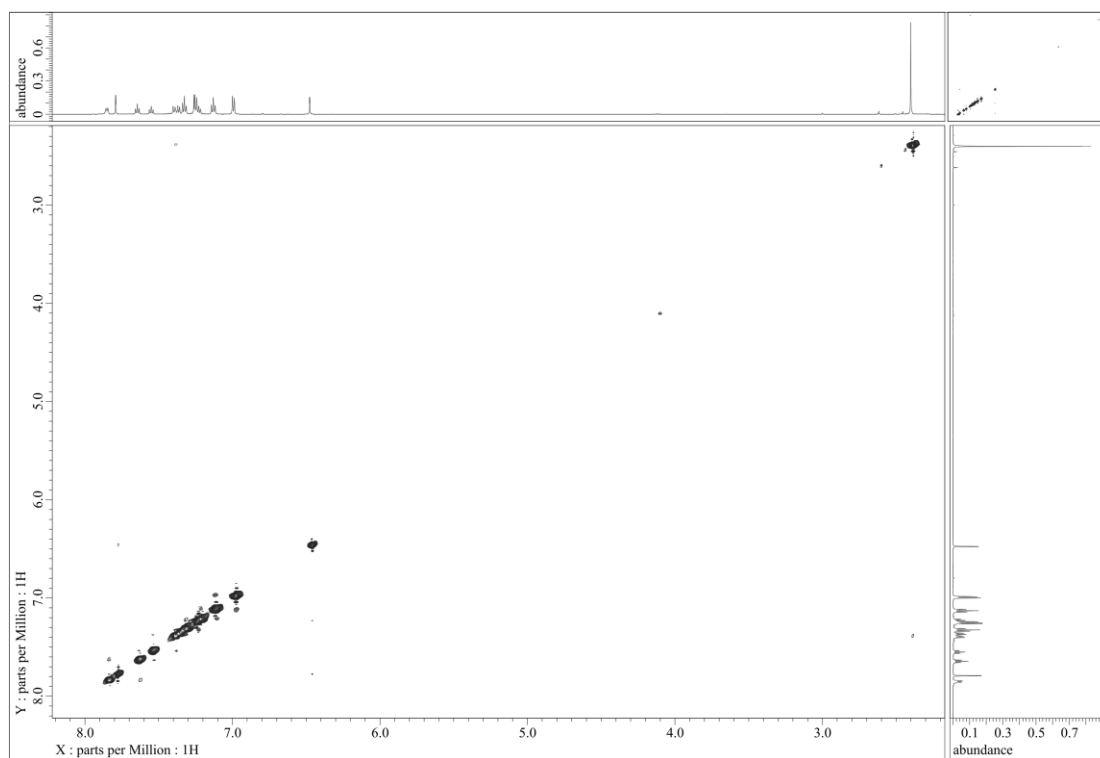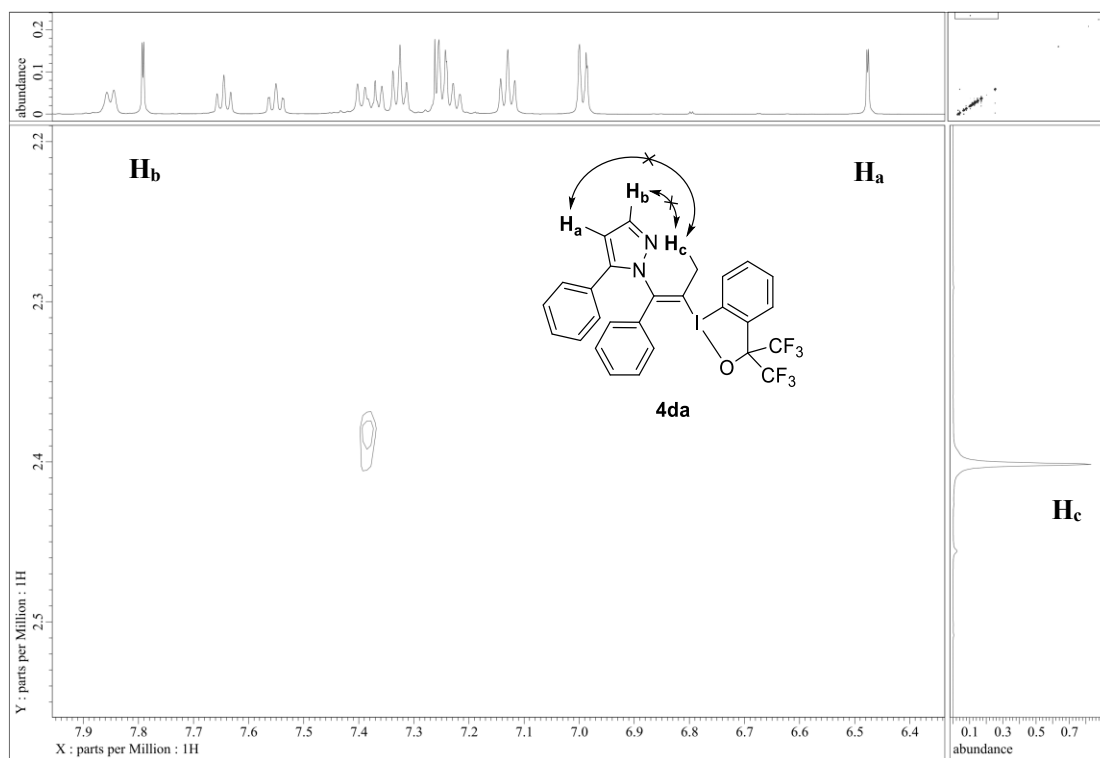

# NOESY spectra of **4da'**

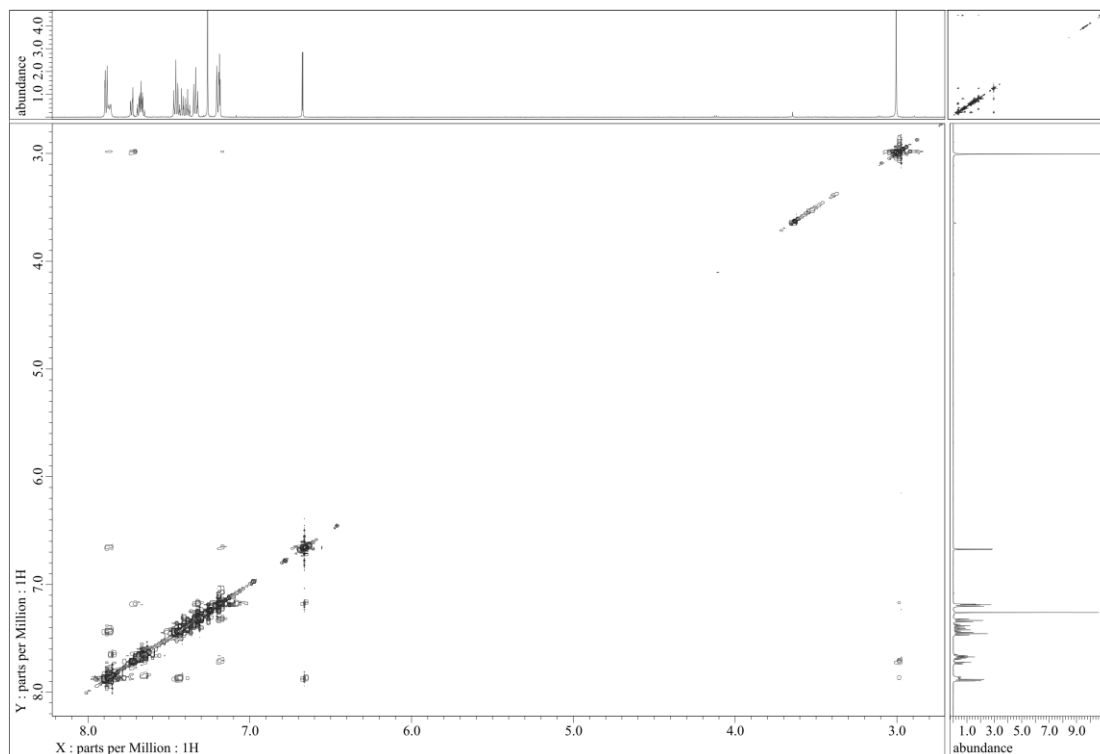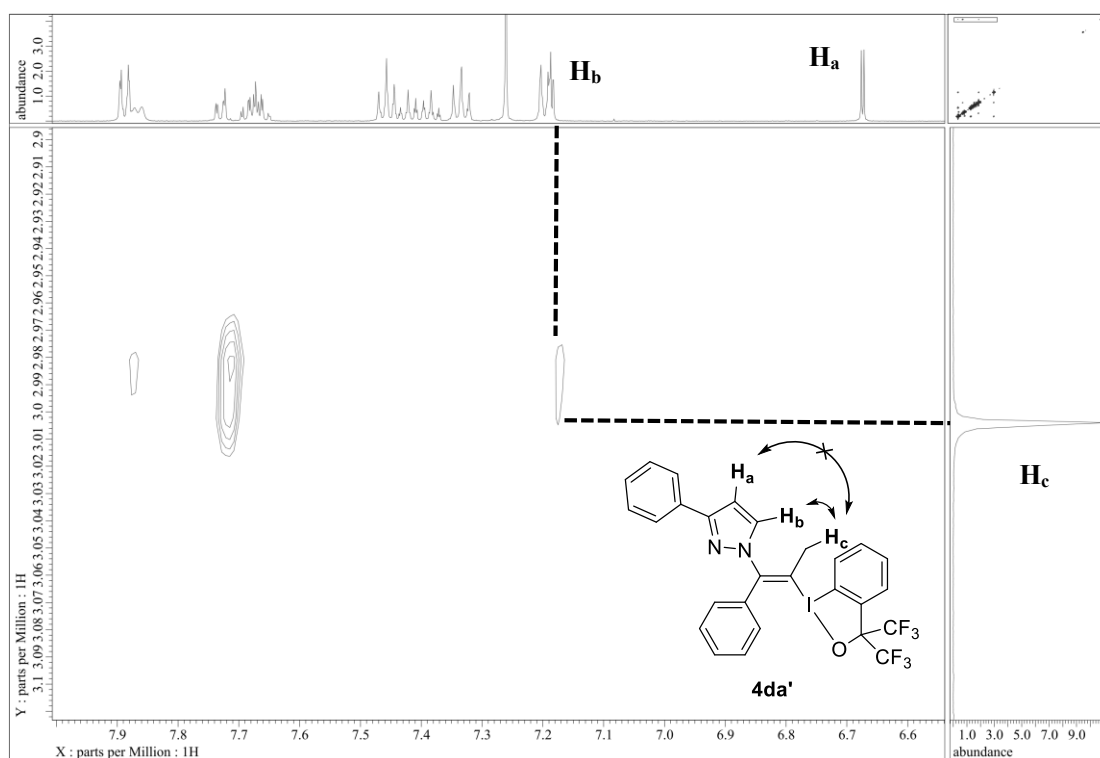

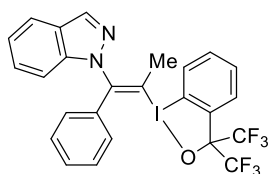

**(E)-1-(2-(3,3-Bis(trifluoromethyl)-1 $\lambda^3$ -benzo[d][1,2]iodaoxol-1(3H)-yl)-1-phenylprop-1-en-1-yl)-1H-indazole (4ea):** Synthesized by the general procedure (40.9 mg, 68%); yellow solid;  $R_f$  0.17 (hexane/EtOAc = 1/1); m.p. 184.0-186.2 °C;  $^1\text{H}$  NMR (600 MHz,  $\text{CDCl}_3$ )  $\delta$  7.88 (d,  $J$  = 7.2 Hz, 1H), 7.83 (s, 1H), 7.77 (d,  $J$  = 9.0 Hz, 1H), 7.75-7.67 (m, 3H), 7.62 (d,  $J$  = 8.4 Hz, 1H), 7.40 (t,  $J$  = 7.8 Hz, 1H), 7.37-7.33 (m, 1H), 7.31 (t,  $J$  = 8.0 Hz, 2H), 7.18 (d,  $J$  = 7.8 Hz, 2H), 7.12 (dd,  $J$  = 8.4 Hz, 6.6 Hz, 1H), 2.80 (s, 3H);  $^{13}\text{C}\{^1\text{H}\}$  NMR (151 MHz,  $\text{CDCl}_3$ )  $\delta$  149.3, 148.5, 137.4, 132.7, 131.5, 130.7, 129.0, 128.8, 127.5, 127.4, 125.1, 123.8 (q,  $J_{\text{C-F}}$  = 292.0 Hz), 123.0, 121.8, 120.8, 120.4, 117.9, 110.6, 81.2-80.8 (m), 24.7 (the number of signals was less than expected by two due to signal overlap);  $^{19}\text{F}\{^1\text{H}\}$  NMR (565 MHz,  $\text{CDCl}_3$ )  $\delta$  -75.9; HRMS (FAB)  $m/z$ :  $[\text{M} + \text{H}]^+$  calcd for  $\text{C}_{25}\text{H}_{18}\text{F}_6\text{IN}_2\text{O}$  603.0363; found, 603.0358.

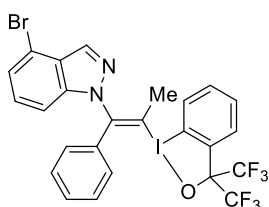

**(E)-1-(2-(3,3-Bis(trifluoromethyl)-1 $\lambda^3$ -benzo[d][1,2]iodaoxol-1(3H)-yl)-1-phenylprop-1-en-1-yl)-4-bromo-1H-indazole (4fa):** Synthesized by the general procedure (42.2 mg, 62%); white solid;  $R_f$  0.13 (hexane/EtOAc = 5/2); m.p. 206.8-209.1 °C;  $^1\text{H}$  NMR (600 MHz,  $\text{CDCl}_3$ )  $\delta$  7.89 (d,  $J$  = 7.2 Hz, 1H), 7.85 (s, 1H), 7.74-7.68 (m, 4H), 7.43 (t,  $J$  = 7.5 Hz, 1H), 7.33 (t,  $J$  = 8.0 Hz, 2H), 7.30 (d,  $J$  = 7.2 Hz, 1H), 7.23-7.18 (m, 3H), 2.76 (s, 3H);  $^{13}\text{C}\{^1\text{H}\}$  NMR (151 MHz,  $\text{CDCl}_3$ )  $\delta$  149.2, 148.2, 137.0, 132.7, 131.5, 130.9, 130.8, 129.1, 128.8, 128.0, 127.3, 126.0, 125.5, 124.0, 123.8 (q,  $J_{\text{C-F}}$  = 296.4 Hz), 122.1, 117.2, 113.2, 110.6, 81.3-80.8 (m), 24.7 (the number of signals was less than expected by one due to signal overlap);  $^{19}\text{F}\{^1\text{H}\}$  NMR

(565 MHz, CDCl<sub>3</sub>)  $\delta$  -75.9; HRMS (FAB)  $m/z$ : [M + H]<sup>+</sup> calcd for C<sub>25</sub>H<sub>17</sub>BrF<sub>6</sub>IN<sub>2</sub>O 680.9468; found, 680.9479.

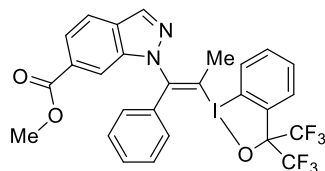

**Methyl (E)-1-(2-(3,3-bis(trifluoromethyl)-1λ<sup>3</sup>-benzo[d][1,2]iodaoxol-1(3H)-yl)-1-phenylprop-1-en-1-yl)-1H-indazole-6-carboxylate (4ga):** Synthesized by the general procedure (28.4 mg, 43%); yellow solid;  $R_f$  0.28 (hexane/EtOAc = 1/1); m.p. 196.0-197.6 °C; <sup>1</sup>H NMR (600 MHz, CDCl<sub>3</sub>)  $\delta$  8.60-8.58 (m, 1H), 7.89 (d,  $J$  = 7.2 Hz, 1H), 7.86-7.84 (m, 1H), 7.75-7.68 (m, 4H), 7.65 (d,  $J$  = 9.0 Hz, 1H), 7.42 (t,  $J$  = 7.2 Hz, 1H), 7.33 (t,  $J$  = 7.8 Hz, 2H), 7.20 (d,  $J$  = 7.2 Hz, 2H), 3.98 (s, 3H), 2.80 (s, 3H); <sup>13</sup>C{<sup>1</sup>H} NMR (151 MHz, CDCl<sub>3</sub>)  $\delta$  167.1, 148.5, 148.1, 137.1, 132.7, 131.5, 130.9, 130.8, 129.3, 129.1, 128.8, 127.3, 125.3, 123.8 (q,  $J_{C-F}$  = 291.0 Hz), 123.5, 122.5, 122.0, 121.8, 120.5, 110.6, 81.2-80.8 (m), 52.3, 24.7 (the number of signals was less than expected by one due to signal overlap); <sup>19</sup>F{<sup>1</sup>H} NMR (565 MHz, CDCl<sub>3</sub>)  $\delta$  -75.9; HRMS (FAB)  $m/z$ : [M + H]<sup>+</sup> calcd for C<sub>27</sub>H<sub>20</sub>F<sub>6</sub>IN<sub>2</sub>O<sub>3</sub> 661.0417; found, 661.0414.

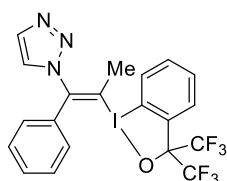

**(E)-1-(2-(3,3-Bis(trifluoromethyl)-1λ<sup>3</sup>-benzo[d][1,2]iodaoxol-1(3H)-yl)-1-phenylprop-1-en-1-yl)-1H-1,2,3-triazole (4ha):** Synthesized by the general procedure (33.1 mg, 60%); white solid;  $R_f$  0.38 (EtOAc); m.p. 160.0-162.3 °C; <sup>1</sup>H NMR (600 MHz, CDCl<sub>3</sub>)  $\delta$  7.87 (d,  $J$  = 7.2 Hz, 1H), 7.79 (d,  $J$  = 1.2 Hz, 1H), 7.72-7.66 (m, 3H), 7.45-7.41 (m, 2H), 7.35 (t,  $J$  = 7.8 Hz, 2H), 7.16-7.14 (m, 2H), 2.75 (s, 3H); <sup>13</sup>C{<sup>1</sup>H} NMR (151 MHz, CDCl<sub>3</sub>)  $\delta$  144.3, 136.3, 133.8,

132.8, 131.4, 131.0, 130.8, 129.3, 128.8, 127.2, 124.9, 123.8 (q,  $J_{\text{C-F}} = 292.8$  Hz), 122.6, 110.4, 81.2-80.6 (m), 24.7 (the number of signals was less than expected by one due to signal overlap);  $^{19}\text{F}\{^1\text{H}\}$  NMR (565 MHz,  $\text{CDCl}_3$ )  $\delta$  -76.0; HRMS (FAB)  $m/z$ :  $[\text{M} + \text{H}]^+$  calcd for  $\text{C}_{20}\text{H}_{15}\text{F}_6\text{IN}_3\text{O}$  554.0159; found, 554.0166.

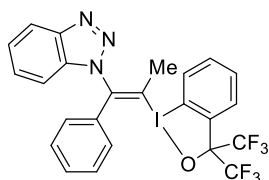

**(*E*)-1-(2-(3,3-Bis(trifluoromethyl)-1 $\lambda^3$ -benzo[*d*][1,2]iodaoxol-1(3*H*)-yl)-1-phenylprop-1-en-1-yl)-1*H*-benzo[*d*][1,2,3]triazole (4ia):** Synthesized by the general procedure (48.9 mg, 81%); white solid;  $R_f$  0.37 (hexane/EtOAc = 1/1); m.p. 164.1-166.1 °C;  $^1\text{H}$  NMR (600 MHz,  $\text{CDCl}_3$ )  $\delta$  8.13 (d,  $J = 8.4$  Hz, 1H), 7.89 (d,  $J = 7.2$  Hz, 1H), 7.80 (d,  $J = 7.8$  Hz, 1H), 7.73 (td,  $J = 7.2$  Hz, 1.2 Hz, 1H), 7.71-7.67 (m, 1H), 7.44-7.35 (m, 3H), 7.33 (t,  $J = 7.8$  Hz, 2H), 7.20 (d,  $J = 6.6$  Hz, 2H), 6.84 (d,  $J = 8.4$  Hz, 1H), 2.71 (s, 3H);  $^{13}\text{C}\{^1\text{H}\}$  NMR (151 MHz,  $\text{CDCl}_3$ )  $\delta$  145.7, 144.3, 135.5, 132.8, 132.7, 131.5, 131.0, 130.7 (2C), 129.1, 129.0, 128.6, 127.2, 124.6, 123.8 (q,  $J_{\text{C-F}} = 292.0$  Hz), 123.1, 120.3, 110.7, 110.5, 81.3-80.9 (m), 24.8;  $^{19}\text{F}\{^1\text{H}\}$  NMR (565 MHz,  $\text{CDCl}_3$ )  $\delta$  -75.9; HRMS (FAB)  $m/z$ :  $[\text{M} + \text{H}]^+$  calcd for  $\text{C}_{24}\text{H}_{17}\text{F}_6\text{IN}_3\text{O}$  604.0315; found, 604.0326.

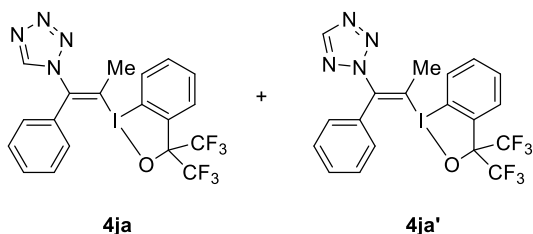

**(*E*)-1-(2-(3,3-bis(trifluoromethyl)-1 $\lambda^3$ -benzo[*d*][1,2]iodaoxol-1(3*H*)-yl)-1-phenylprop-1-en-1-yl)-1*H*-tetrazole (4ja) and (*E*)-2-(2-(3,3-bis(trifluoromethyl)-1 $\lambda^3$ -benzo[*d*][1,2]iodaoxol-1(3*H*)-yl)-1-phenylprop-1-en-1-yl)-2*H*-tetrazole (4ja'):**

Synthesized by the general procedure and obtained as regioisomeric mixtures (40.5 mg, 73%, ratio = 7/3 as determined by  $^1\text{H}$  NMR), which were separated by column chromatography on silica gel; the structural assignments for the regioisomers were made by NOESY analysis (see below); **4ja**: yellow solid;  $R_f$  0.50 (EtOAc); m.p. 176.4-177.6 °C;  $^1\text{H}$  NMR (600 MHz,  $\text{CDCl}_3$ )  $\delta$  8.46 (s, 1H), 7.89 (d,  $J$  = 6.6 Hz, 1H), 7.75-7.70 (m, 2H), 7.59-7.56 (m, 1H), 7.48 (tt,  $J$  = 7.8 Hz, 1.2 Hz, 1H), 7.38 (t,  $J$  = 7.8 Hz, 2H), 7.16 (d,  $J$  = 7.8 Hz, 2H), 2.76 (s, 3H);  $^{13}\text{C}\{^1\text{H}\}$  NMR (151 MHz,  $\text{CDCl}_3$ )  $\delta$  143.1, 140.6, 135.3, 132.9, 131.5, 131.4, 131.0, 130.9, 129.6, 128.7, 127.2, 125.0, 123.7 (q,  $J_{\text{C-F}}$  = 294.3 Hz), 110.5, 81.2-80.8 (m), 24.4;  $^{19}\text{F}$  NMR (565 MHz,  $\text{CDCl}_3$ )  $\delta$  -75.9; HRMS (FAB)  $m/z$ :  $[\text{M} + \text{H}]^+$  calcd for  $\text{C}_{19}\text{H}_{14}\text{F}_6\text{IN}_4\text{O}$  555.0111; found, 555.0132.; **4ja'**: yellow solid;  $R_f$  0.26 (hexane/EtOAc = 1/1); m.p. 138.1-139.6 °C;  $^1\text{H}$  NMR (600 MHz,  $\text{CDCl}_3$ )  $\delta$  8.68 (s, 1H), 7.89 (d,  $J$  = 6.6 Hz, 1H), 7.75-7.70 (m, 2H), 7.63-7.61 (m, 1H), 7.43 (tt,  $J$  = 7.2 Hz, 1.2 Hz, 1H), 7.37-7.33 (m, 2H), 7.20-7.18 (m, 2H), 2.67 (s, 3H);  $^{13}\text{C}\{^1\text{H}\}$  NMR (151 MHz,  $\text{CDCl}_3$ )  $\delta$  152.8, 144.3, 135.1, 132.9, 131.4, 131.0, 130.98, 130.89, 129.1, 128.7, 127.2, 126.0, 123.7 (q,  $J_{\text{C-F}}$  = 291.6 Hz), 110.5, 81.4-80.6 (m), 24.2;  $^{19}\text{F}\{^1\text{H}\}$  NMR (565 MHz,  $\text{CDCl}_3$ )  $\delta$  -75.9; HRMS (FAB)  $m/z$ :  $[\text{M} + \text{H}]^+$  calcd for  $\text{C}_{19}\text{H}_{14}\text{F}_6\text{IN}_4\text{O}$  555.0111; found, 555.0124.

# NOESY spectra of **4ja**

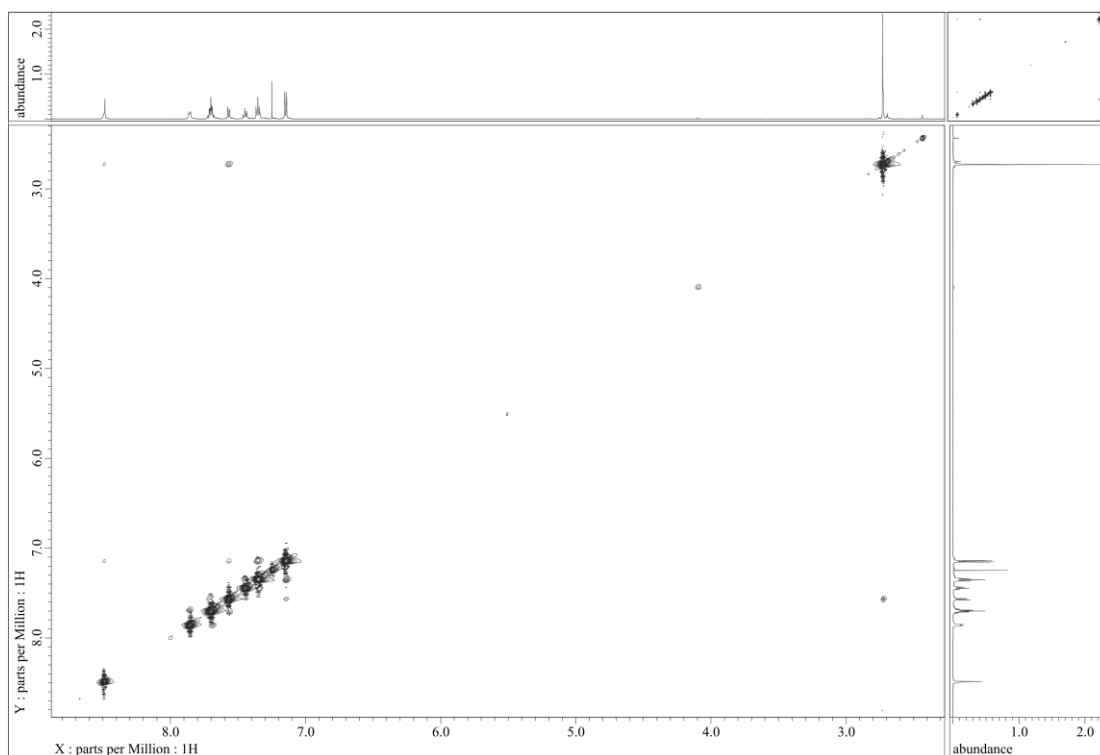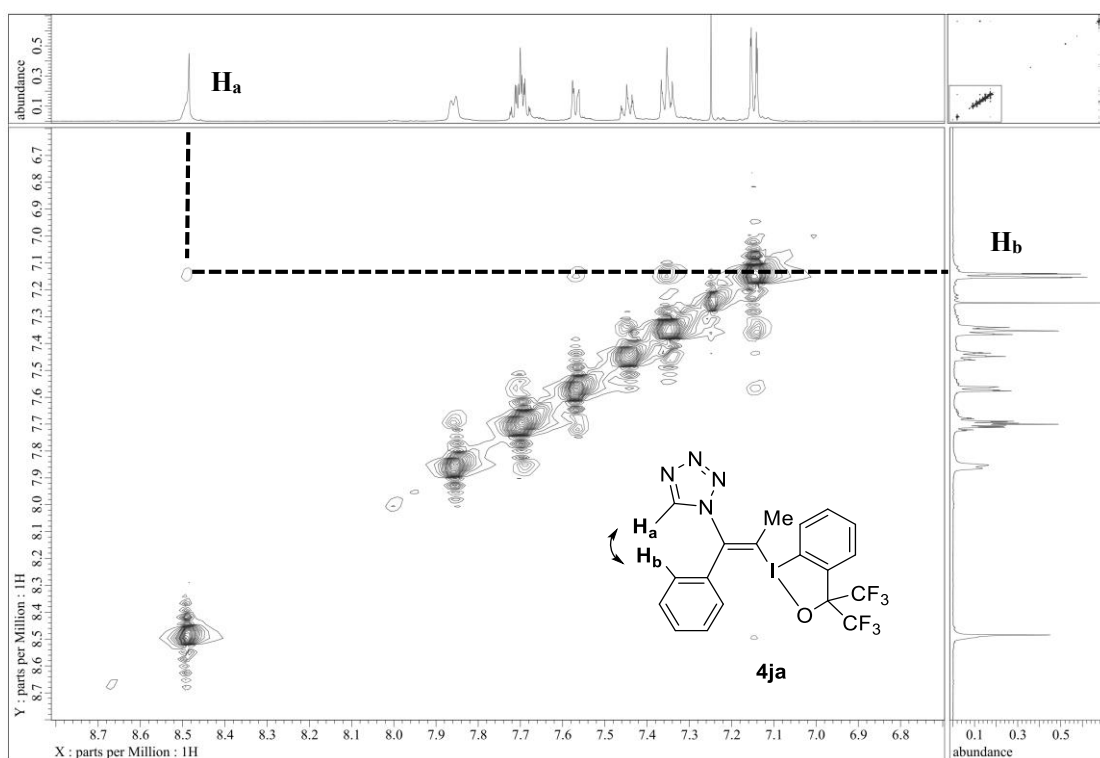

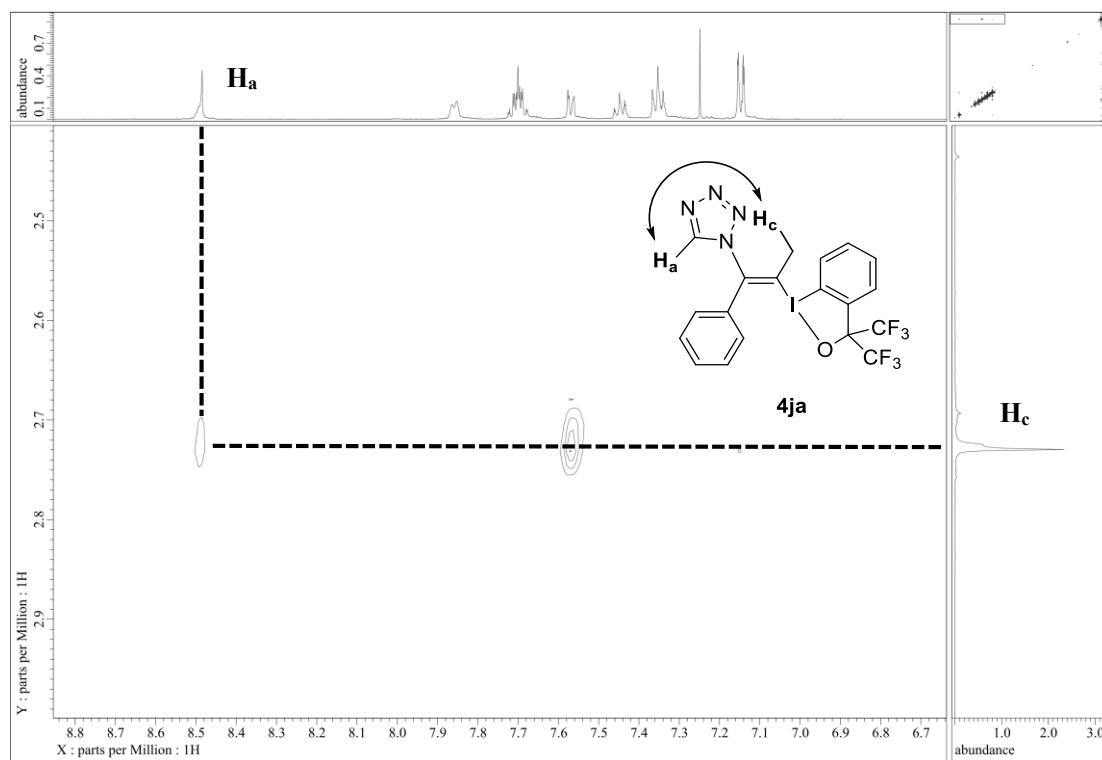

# NOESY spectra of **4ja'**

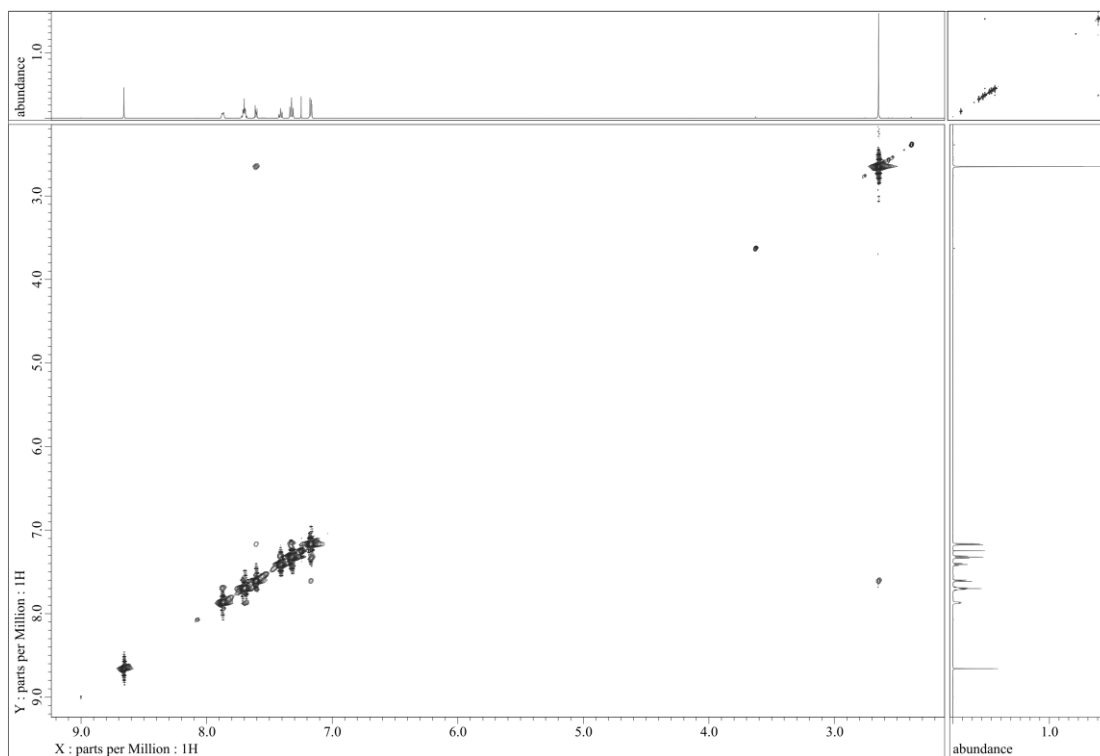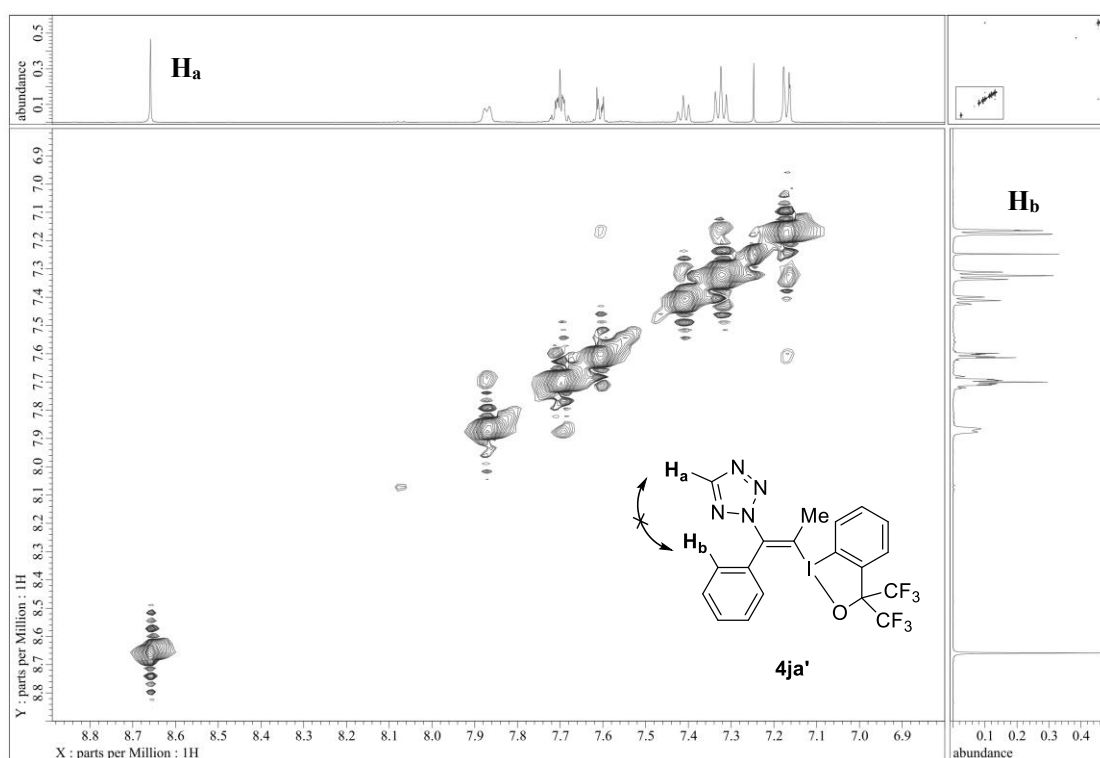

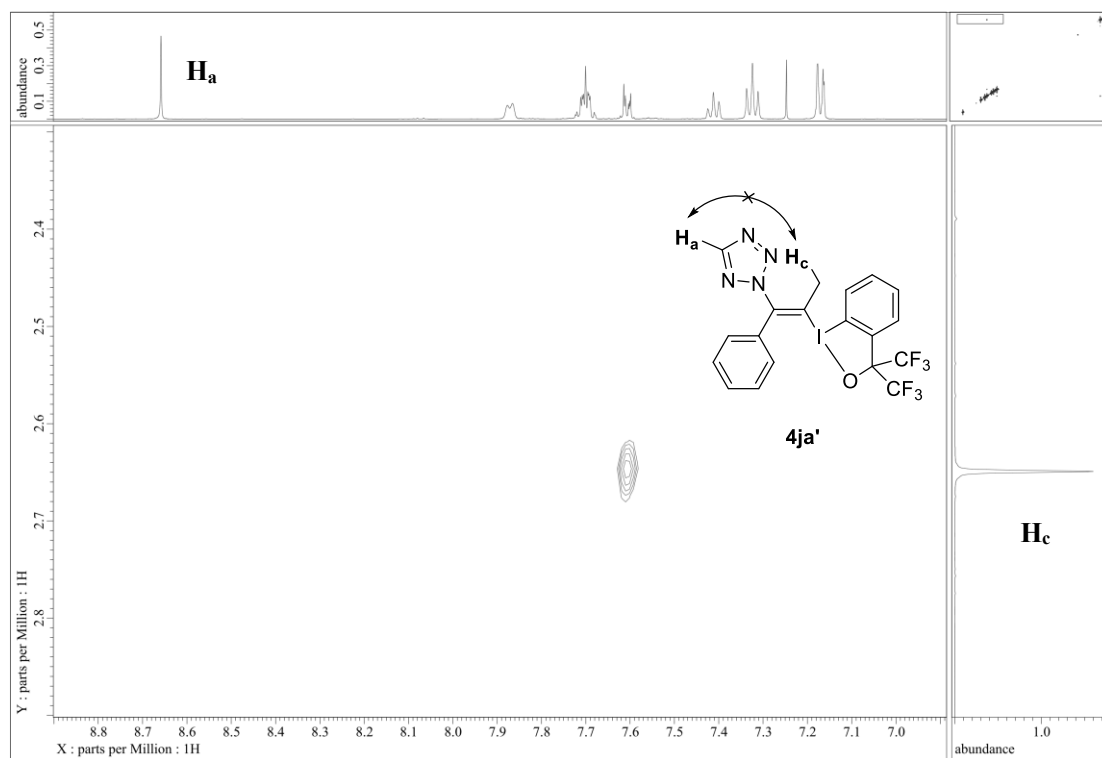

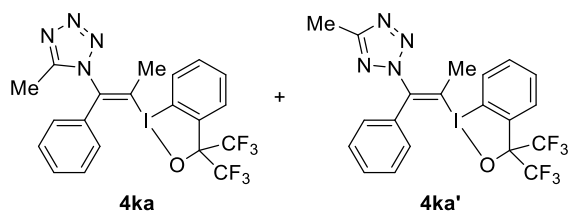

**(*E*)-1-(2-(3,3-Bis(trifluoromethyl)-1 $\lambda^3$ -benzo[*d*][1,2]iodaoxol-1(3*H*)-yl)-1-phenylprop-1-en-1-yl)-5-methyl-1*H*-tetrazole (4ka) and (*E*)-2-(2-(3,3-bis(trifluoromethyl)-1 $\lambda^3$ -benzo[*d*][1,2]iodaoxol-1(3*H*)-yl)-1-phenylprop-1-en-1-yl)-5-methyl-2*H*-tetrazole (4ka'):**

Synthesized by the general procedure and obtained as regioisomeric mixtures (54.0 mg, 95%, ratio = 7/3 as determined by  $^1\text{H}$  NMR), which were separated by column chromatography on silica gel; the structural assignments for the regioisomers were made by analogy with compound **4ja** and **4ja'**; **4ka**: white solid;  $R_f$  0.53 (hexane/EtOAc = 1/2); m.p. 172.4-174.6 °C;  $^1\text{H}$  NMR (600 MHz,  $\text{CDCl}_3$ )  $\delta$  7.87 (d,  $J$  = 7.2 Hz, 1H), 7.76-7.72 (m, 1H), 7.72-7.68 (m, 1H), 7.65 (dd,  $J$  = 8.4 Hz, 1.2 Hz, 1H), 7.43 (tt,  $J$  = 7.2 Hz, 1.2 Hz, 1H), 7.38-7.33 (m, 2H), 7.23-7.19 (m, 2H), 2.54 (s, 3H), 2.28 (s, 3H);  $^{13}\text{C}\{^1\text{H}\}$  NMR (151 MHz,  $\text{CDCl}_3$ )  $\delta$  152.0, 141.5, 134.3, 133.0, 131.4, 131.2, 131.0, 130.9, 129.3, 128.8, 127.6, 127.1, 123.7 (q,  $J_{\text{C-F}}$  = 291.7 Hz), 110.1, 81.2-80.8 (m), 24.3, 9.3;  $^{19}\text{F}\{^1\text{H}\}$  NMR (565 MHz,  $\text{CDCl}_3$ )  $\delta$  -75.9; HRMS (FAB)  $m/z$ :  $[\text{M} + \text{H}]^+$  calcd for  $\text{C}_{20}\text{H}_{16}\text{F}_6\text{IN}_4\text{O}$  569.0267; found, 569.0280.; **4ka'**: white solid;  $R_f$  0.35 (hexane/EtOAc = 1/1); m.p. 163.0-165.0 °C;  $^1\text{H}$  NMR (600 MHz,  $\text{CDCl}_3$ )  $\delta$  7.88 (d,  $J$  = 7.2 Hz, 1H), 7.73-7.68 (m, 2H), 7.63-7.60 (m, 1H), 7.42 (tt,  $J$  = 7.2 Hz, 0.6 Hz, 1H), 7.33 (t,  $J$  = 7.8 Hz, 2H), 7.19-7.16 (m, 2H), 2.68 (s, 3H), 2.61 (s, 3H);  $^{13}\text{C}\{^1\text{H}\}$  NMR (151 MHz,  $\text{CDCl}_3$ )  $\delta$  163.2, 144.6, 135.3, 132.9, 131.4, 131.0, 130.90, 130.87, 129.1, 128.7, 127.3, 125.2, 123.7 (q,  $J$  = 291.3 Hz), 110.5, 81.2-80.8 (m), 24.3, 11.0;  $^{19}\text{F}\{^1\text{H}\}$  NMR (565 MHz,  $\text{CDCl}_3$ )  $\delta$  -75.9; HRMS (FAB)  $m/z$ :  $[\text{M} + \text{H}]^+$  calcd for  $\text{C}_{20}\text{H}_{16}\text{F}_6\text{IN}_4\text{O}$  569.0267; found 569.0246.

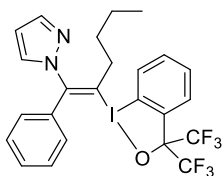

**(E)-1-(2-(3,3-Bis(trifluoromethyl)-1 $\lambda^3$ -benzo[d][1,2]iodaoxol-1(3H)-yl)-1-phenylhex-1-en-1-yl)-1H-pyrazole (4ab):** Synthesized by the general procedure (23.6 mg, 40%); white solid;  $R_f$  0.55 (hexane/EtOAc = 1/1); m.p. 129.9-131.2 °C;  $^1\text{H}$  NMR (600 MHz,  $\text{CDCl}_3$ )  $\delta$  7.82 (d,  $J$  = 7.2 Hz, 1H), 7.76-7.73 (m, 2H), 7.66-7.60 (m, 2H), 7.38 (t,  $J$  = 7.5 Hz, 1H), 7.32-7.28 (m, 2H), 7.19 (d,  $J$  = 1.8 Hz, 1H), 7.15-7.11 (m, 2H), 6.37-6.36 (m, 1H), 3.10-2.90 (m, 2H), 1.70-1.61 (m, 2H), 1.40-1.31 (m, 2H), 0.88 (t,  $J$  = 7.5 Hz, 3H);  $^{13}\text{C}\{^1\text{H}\}$  NMR (151 MHz,  $\text{CDCl}_3$ )  $\delta$  147.7, 141.2, 137.9, 132.4, 131.9, 131.7, 130.6, 130.5, 129.1, 129.0, 127.6, 127.2, 125.0, 124.0 (q,  $J_{\text{C-F}}$  = 292.8 Hz), 111.1, 107.3, 81.4-81.0 (m), 36.3, 32.1, 22.4, 13.7;  $^{19}\text{F}\{^1\text{H}\}$  NMR (565 MHz,  $\text{CDCl}_3$ )  $\delta$  -75.8; HRMS (FAB)  $m/z$ :  $[\text{M} + \text{H}]^+$  calcd for  $\text{C}_{24}\text{H}_{22}\text{F}_6\text{IN}_2\text{O}$  595.0676; found, 595.0691.

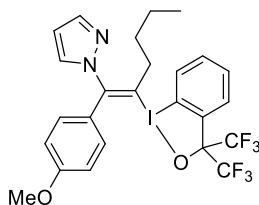

**(E)-1-(2-(3,3-Bis(trifluoromethyl)-1 $\lambda^3$ -benzo[d][1,2]iodaoxol-1(3H)-yl)-1-(4-methoxyphenyl)hex-1-en-1-yl)-1H-pyrazole (4ac):** Synthesized by the general procedure (33.1 mg, 53%); white solid;  $R_f$  0.20 (hexane/EtOAc = 3/2); m.p. 42.4-44.0 °C;  $^1\text{H}$  NMR (600 MHz,  $\text{CDCl}_3$ )  $\delta$  7.83 (d,  $J$  = 7.2 Hz, 1H), 7.75 (dd,  $J$  = 8.4 Hz, 1.8 Hz, 1H), 7.73 (d,  $J$  = 1.8 Hz, 1H), 7.66-7.60 (m, 2H), 7.22 (d,  $J$  = 2.4 Hz, 1H), 7.08-7.05 (m, 2H), 6.81-6.78 (m, 2H), 6.38-6.36 (m, 1H), 3.78 (s, 3H), 3.10-2.70 (m, 2H), 1.67-1.61 (m, 2H), 1.37-1.30 (m, 2H), 0.87 (t,  $J$  = 7.2 Hz, 3H);  $^{13}\text{C}\{^1\text{H}\}$  NMR (151 MHz,  $\text{CDCl}_3$ )  $\delta$  161.3, 147.8, 141.1, 132.2, 131.8, 131.6, 130.7, 130.5, 130.3, 130.0, 127.6, 123.9 (q,  $J$  = 292.5 Hz), 123.7, 114.3, 111.0, 107.2, 81.3-80.9 (m), 55.4, 36.3, 32.0, 22.3, 13.6;  $^{19}\text{F}\{^1\text{H}\}$  NMR (565 MHz,  $\text{CDCl}_3$ )  $\delta$  -75.9; HRMS (FAB)

$m/z$ :  $[M + H]^+$  calcd for  $C_{25}H_{24}F_6IN_2O_2$  625.0781; found, 625.0776.

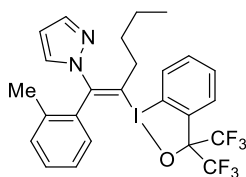

**(E)-1-(2-(3,3-Bis(trifluoromethyl)-1 $\lambda^3$ -benzo[d][1,2]iodaoxol-1(3H)-yl)-1-(*o*-tolyl)hex-1-en-1-yl)-1H-pyrazole (4ad):** Synthesized by the general procedure (21.9 mg, 36%); white solid;  $R_f$  0.13 (hexane/EtOAc = 4/1); m.p. 115.1-117.3 °C;  $^1H$  NMR (600 MHz,  $CDCl_3$ )  $\delta$  7.81 (d,  $J$  = 7.2 Hz, 1H), 7.77-7.72 (m, 2H), 7.65-7.59 (m, 2H), 7.32 (t,  $J$  = 7.2 Hz, 1H), 7.20 (d,  $J$  = 7.8 Hz, 1H), 7.15-7.07 (m, 2H), 7.05 (d,  $J$  = 2.4 Hz, 1H), 6.32-6.30 (m, 1H), 3.50-2.95 (m, 2H), 1.97 (s, 3H), 1.76-1.67 (m, 2H), 1.43-1.34 (m, 2H), 0.89 (t,  $J$  = 7.2 Hz, 3H);  $^{13}C\{^1H\}$  NMR (151 MHz,  $CDCl_3$ )  $\delta$  146.6, 141.3, 137.7, 137.0, 132.2, 131.9, 131.38, 131.35, 130.7, 130.5, 130.3, 129.7, 127.8, 126.5, 124.3, 124.0 (q,  $J$  = 288.1 Hz), 110.9, 107.3, 81.4-81.0 (m), 35.8, 32.2, 22.3, 18.8, 13.6;  $^{19}F\{^1H\}$  NMR (565 MHz,  $CDCl_3$ )  $\delta$  -75.7 (q,  $J$  = 8.5 Hz), -76.2 (q,  $J$  = 7.9 Hz); HRMS (FAB)  $m/z$ :  $[M + H]^+$  calcd for  $C_{25}H_{24}F_6IN_2O$  609.0832; found, 609.0848.

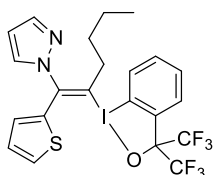

**(E)-1-(2-(3,3-Bis(trifluoromethyl)-1 $\lambda^3$ -benzo[d][1,2]iodaoxol-1(3H)-yl)-1-(thiophen-2-yl)hex-1-en-1-yl)-1H-pyrazole (4ae):** Synthesized by the general procedure (34.2 mg, 57%); yellow solid;  $R_f$  0.55 (hexane/EtOAc = 1/1); m.p. 43.2-45.0 °C;  $^1H$  NMR (600 MHz,  $CDCl_3$ )  $\delta$  7.86 (d,  $J$  = 6.0 Hz, 1H), 7.75-7.73 (m, 1H), 7.70-7.67 (m, 1H), 7.65-7.61 (m, 2H), 7.39 (d,  $J$  = 2.4 Hz, 1H), 7.37-7.34 (m, 1H), 6.97-6.93 (m, 2H), 6.43-6.40 (m, 1H), 2.90-2.70 (m, 2H), 1.66-1.60 (m, 2H), 1.36-1.28 (m, 2H), 0.86 (t,  $J$  = 7.5 Hz, 3H);  $^{13}C\{^1H\}$  NMR (151 MHz,  $CDCl_3$ )  $\delta$  141.4, 141.2, 139.0, 132.4, 131.5, 131.3, 130.8, 130.6, 130.5, 129.4, 127.5, 127.2, 127.1, 123.9 (q,  $J_{C-F}$  = 292.0 Hz), 111.2, 107.3, 81.5-80.7 (m), 36.7, 31.9, 22.4, 13.6;  $^{19}F\{^1H\}$

NMR (565 MHz, CDCl<sub>3</sub>)  $\delta$  -75.9; HRMS (FAB)  $m/z$ : [M + H]<sup>+</sup> calcd for C<sub>22</sub>H<sub>20</sub>F<sub>6</sub>IN<sub>2</sub>OS 601.0240; found, 601.0257.

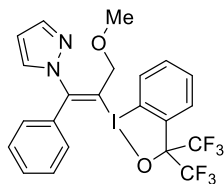

**(E)-1-(2-(3,3-Bis(trifluoromethyl)-1λ<sup>3</sup>-benzo[d][1,2]iodaoxol-1(3H)-yl)-3-methoxy-1-phenylprop-1-en-1-yl)-1H-pyrazole (4af):** Synthesized by the general procedure (19.2 mg, 33%); white solid;  $R_f$  0.29 (hexane/EtOAc = 1/1); m.p. 134.0-136.0 °C; <sup>1</sup>H NMR (600 MHz, CDCl<sub>3</sub>)  $\delta$  7.78-7.74 (m, 3H), 7.60-7.56 (m, 2H), 7.38 (tt,  $J$  = 7.8 Hz, 1.2 Hz, 1H), 7.29-7.25 (m, 3H), 7.12 (d,  $J$  = 7.8 Hz, 2H), 6.39-6.38 (m, 1H), 4.62 (s, 2H), 3.39 (s, 2H); <sup>13</sup>C{<sup>1</sup>H} NMR (151 MHz, CDCl<sub>3</sub>)  $\delta$  147.8, 141.7, 136.6, 132.0, 131.9, 131.7, 130.8, 130.1, 130.0, 129.2, 128.8, 128.1, 123.9 (q,  $J_{C-F}$  = 291.7 Hz), 120.1, 112.6, 107.7, 81.4-81.0 (m), 72.7, 58.9; <sup>19</sup>F{<sup>1</sup>H} NMR (565 MHz, CDCl<sub>3</sub>)  $\delta$  -76.0; HRMS (FAB)  $m/z$ : [M + H]<sup>+</sup> calcd for C<sub>22</sub>H<sub>18</sub>F<sub>6</sub>IN<sub>2</sub>O<sub>2</sub> 583.0312; found, 583.0303.

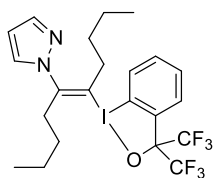

**(E)-1-(6-(3,3-Bis(trifluoromethyl)-1λ<sup>3</sup>-benzo[d][1,2]iodaoxol-1(3H)-yl)dec-5-en-5-yl)-1H-pyrazole (4ag):** Synthesized by the general procedure (35.7 mg, 62%); yellow oil;  $R_f$  0.35 (hexane/EtOAc = 1/1); <sup>1</sup>H NMR (600 MHz, CDCl<sub>3</sub>)  $\delta$  7.91 (d,  $J$  = 7.8 Hz, 1H), 7.72-7.71 (m, 1H), 7.65 (t,  $J$  = 7.8 Hz, 1H), 7.61 (td,  $J$  = 7.8 Hz, 1.5 Hz, 1H), 7.57 (d,  $J$  = 7.8 Hz, 1H), 7.50 (d,  $J$  = 1.8 Hz, 1H), 6.44 (t,  $J$  = 7.8 Hz, 1H), 2.97-2.86 (m, 2H), 2.56-2.47 (m, 2H), 1.51-1.45 (m, 2H), 1.29-1.18 (m, 6H), 0.81 (t,  $J$  = 7.5 Hz, 3H), 0.77 (t,  $J$  = 7.0 Hz, 3H); <sup>13</sup>C{<sup>1</sup>H} NMR (151 MHz, CDCl<sub>3</sub>)  $\delta$  150.1, 140.8, 132.5, 131.5, 130.8, 130.7, 130.1, 127.3, 124.7, 124.0 (q,  $J_{C-F}$  = 294.1 Hz), 109.9, 106.8, 81.4-80.7 (m), 38.3, 35.5, 32.0, 29.5, 22.3, 22.0, 13.55, 13.52;

$^{19}\text{F}$  { $^1\text{H}$ } NMR (565 MHz,  $\text{CDCl}_3$ )  $\delta$  -75.8; HRMS (FAB)  $m/z$ :  $[\text{M} + \text{H}]^+$  calcd for  $\text{C}_{22}\text{H}_{26}\text{F}_6\text{IN}_2\text{O}$  575.0989; found, 575.1000.

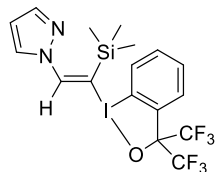

**(*E*)-1-(2-(3,3-Bis(trifluoromethyl)-1 $\lambda^3$ -benzo[*d*][1,2]iodaoxol-1(3*H*)-yl)-2-**

**(trimethylsilyl)vinyl)-1*H*-pyrazole (4ah):** Synthesized by the general procedure (14.4 mg, 27%); white solid;  $R_f$  0.22 (hexane/EtOAc = 1/1); m.p. 128.7-130.5 °C;  $^1\text{H}$  NMR (600 MHz,  $\text{CDCl}_3$ )  $\delta$  8.20-8.18 (m, 1H), 7.86 (d,  $J$  = 7.2 Hz, 1H), 7.76-7.74 (m, 1H), 7.62-7.57 (m, 2H), 7.57-7.50 (m, 2H), 6.48-6.47 (m, 1H), 0.35 (m, 9H);  $^{13}\text{C}$  { $^1\text{H}$ } NMR (151 MHz,  $\text{CDCl}_3$ )  $\delta$  149.1, 142.7, 131.9, 131.7, 131.2, 130.4, 130.3, 127.4, 124.1 (q,  $J$  = 291.3 Hz), 114.3, 111.7, 108.7, 81.4-81.0 (m), 2.1;  $^{19}\text{F}$  { $^1\text{H}$ } NMR (565 MHz,  $\text{CDCl}_3$ )  $\delta$  -75.4, -76.5; HRMS (FAB)  $m/z$ :  $[\text{M} + \text{H}]^+$  calcd for  $\text{C}_{17}\text{H}_{18}\text{F}_6\text{IN}_2\text{OSi}$  535.0132; found, 535.0138.

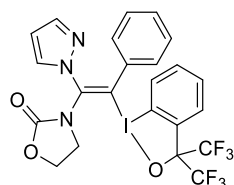

**(*E*)-3-(2-(3,3-Bis(trifluoromethyl)-1 $\lambda^3$ -benzo[*d*][1,2]iodaoxol-1(3*H*)-yl)-2-phenyl-1-(1*H*-pyrazol-1-yl)vinyl)oxazolidin-2-one (4ai):** Synthesized by the general procedure (30.5 mg, 49%); white solid;  $R_f$  0.34 ( $\text{Et}_2\text{O}$ ); m.p. 150.4-151.5 °C;  $^1\text{H}$  NMR (600 MHz,  $\text{CDCl}_3$ )  $\delta$  7.78 (d,  $J$  = 8.4 Hz, 1H), 7.76 (d,  $J$  = 7.8 Hz, 1H), 7.66 (d,  $J$  = 1.8 Hz, 1H), 7.55 (t,  $J$  = 7.2 Hz, 1H), 7.48-7.45 (m, 1H), 7.26-7.22 (m, 3H), 7.22-7.19 (m, 2H), 7.13 (d,  $J$  = 2.4 Hz, 1H), 6.20-6.18 (m, 1H), 4.47 (t,  $J$  = 7.8 Hz, 2H), 3.73 (t,  $J$  = 7.8 Hz, 2H);  $^{13}\text{C}$  { $^1\text{H}$ } NMR (151 MHz,  $\text{CDCl}_3$ )  $\delta$  156.2, 142.3, 136.6, 135.7, 132.1, 131.84, 131.79, 130.6, 130.1, 129.4, 129.1, 128.8, 124.0 (q,  $J_{\text{C-F}}$  = 292.0 Hz), 119.3, 111.5, 108.2, 81.6-81.2 (m), 62.9, 45.1;  $^{19}\text{F}$  { $^1\text{H}$ } NMR (565 MHz,  $\text{CDCl}_3$ )  $\delta$  -75.7; HRMS (FAB)  $m/z$ :  $[\text{M} + \text{H}]^+$  calcd for  $\text{C}_{23}\text{H}_{17}\text{F}_6\text{IN}_3\text{O}_3$  624.0213; found, 624.0213.

624.0215.

### 3. Product Transformations

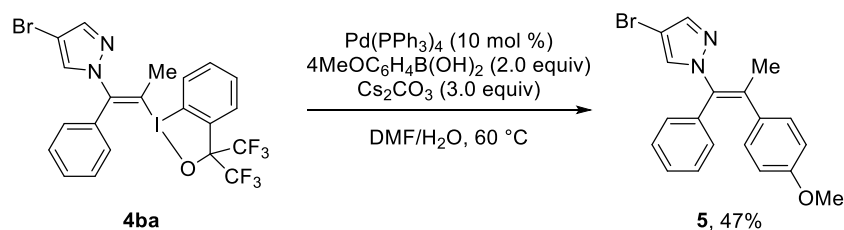

**(E)-4-Bromo-1-(2-(4-methoxyphenyl)-1-phenylprop-1-en-1-yl)-1H-pyrazole (5):** Under an argon atmosphere, a 4 mL vial equipped with a stir bar was charged with **4ba** (63.1 mg, 0.10 mmol), Pd(PPh<sub>3</sub>)<sub>4</sub> (11.6 mg, 0.010 mmol, 10 mol %) and Cs<sub>2</sub>CO<sub>3</sub> (97.7 mg, 0.30 mmol, 3.0 equiv), followed by the addition of DMF (0.80 mL) and H<sub>2</sub>O (0.20 mL). Then (4-methoxyphenyl)boronic acid (30.4 mg, 0.20 mmol, 2.0 equiv) was added. The resulting mixture was placed on an aluminum block preheated at 60 °C and stirred for 18 h. The mixture was cooled to room temperature, diluted with Et<sub>2</sub>O (10 mL), and washed with H<sub>2</sub>O (5 mL) and brine (5 mL). The organic layer was dried over Na<sub>2</sub>SO<sub>4</sub> and concentrated under reduced pressure. The residue was purified by flash column chromatography on silica gel to afford the title compound **5** as a yellow oil (17.4 mg, 47%).

*R*<sub>f</sub> 0.25 (hexane/EtOAc = 10/1); <sup>1</sup>H NMR (600 MHz, CDCl<sub>3</sub>) δ 7.64 (s, 1H), 7.48 (s, 1H), 7.13-7.07 (m, 5H), 6.90-6.86 (m, 2H), 6.76-7.72 (m, 2H), 3.77 (s, 3H), 2.05 (s, 3H); <sup>13</sup>C {<sup>1</sup>H} NMR (151 MHz, CDCl<sub>3</sub>) δ 158.9, 140.4, 137.1, 136.4, 134.8, 132.9, 131.1, 130.1, 129.5, 128.0, 127.6, 113.7, 93.7, 55.2, 21.6; HRMS (EI) *m/z*: [M]<sup>+</sup> calcd for C<sub>19</sub>H<sub>17</sub>BrN<sub>2</sub>O 368.0519; found, 368.0507.

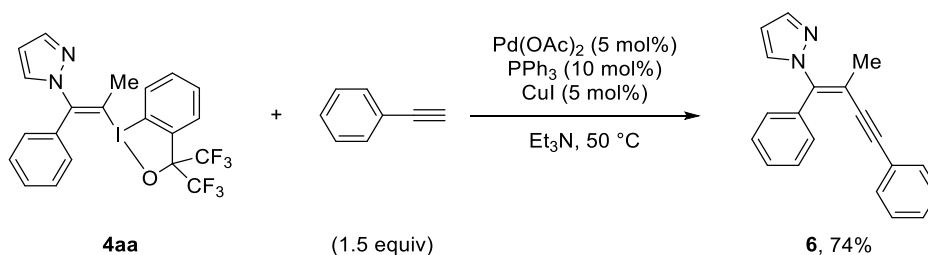

**(E)-1-(2-Methyl-1,4-diphenylbut-1-en-3-yn-1-yl)-1H-pyrazole (6):** Under an argon

atmosphere, a 4 mL vial equipped with a stir bar was charged with **4aa** (55.2 mg, 0.10 mmol), Pd(OAc)<sub>2</sub> (1.1 mg, 5.0 μmol, 5 mol%), PPh<sub>3</sub> (2.6 mg, 0.01 mmol, 10 mol %), CuI (1.0 mg, 5.3 μmol, 5 mol%), and Et<sub>3</sub>N (0.6 mL). To the mixture was added ethynylbenzene (15.3 mg, 0.15 mmol, 1.5 equiv), and the resulting mixture was placed on an aluminum block preheated at 50 °C and stirred for 5 h. The mixture was diluted with Et<sub>2</sub>O (10 mL) and washed with H<sub>2</sub>O (5 mL) and brine (5 mL). The organic layer was dried over Na<sub>2</sub>SO<sub>4</sub> and concentrated under reduced pressure. The residue was purified by flash column chromatography on silica gel to afford the title compound **6** as a white solid (21.0 mg, 74%).

*R*<sub>f</sub> 0.38 (hexane/EtOAc = 10/1); m.p. 75.4-77.1 °C; <sup>1</sup>H NMR (600 MHz, CDCl<sub>3</sub>) δ 7.71 (d, *J* = 1.2 Hz, 1H), 7.48 (dd, *J* = 8.4 Hz, 2.4 Hz, 2H), 7.45 (d, *J* = 3.0 Hz, 1H), 7.36-7.32 (m, 5H), 7.31-7.29 (m, 3H), 6.40 (t, *J* = 1.8 Hz, 1H), 2.04 (s, 3H); <sup>13</sup>C{<sup>1</sup>H} NMR (151 MHz, CDCl<sub>3</sub>) δ 142.7, 140.5, 136.8, 131.7, 131.4, 128.85, 128.80, 128.4, 128.3, 127.9, 123.1, 115.5, 106.2, 94.4, 90.1, 20.4; HRMS (EI) *m/z*: [M]<sup>+</sup> calcd for C<sub>20</sub>H<sub>16</sub>N<sub>2</sub> 284.1308; found, 284.1319.

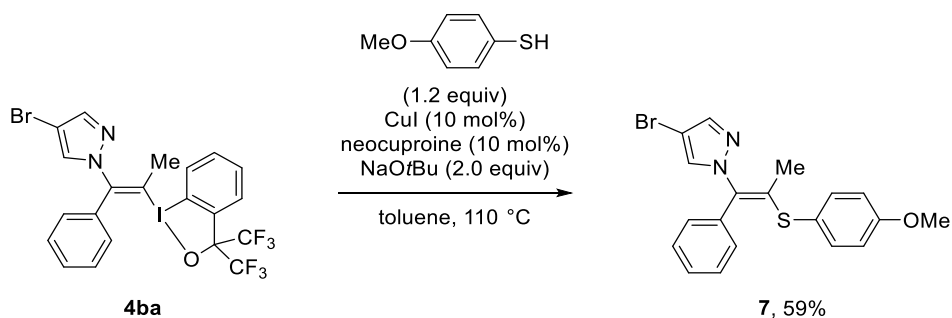

**(*E*)-4-Bromo-1-(2-((4-methoxyphenyl)thio)-1-phenylprop-1-en-1-yl)-1*H*-pyrazole (7):**

Under an argon atmosphere, a 4 mL vial equipped with a stir bar was charged with **4ba** (63.1 mg, 0.10 mmol), CuI (1.9 mg, 0.010 mmol), neocuproine (2.1 mg, 0.010 mmol), and NaO*t*-Bu (19.2 mg, 0.20 mmol), followed by the addition of toluene (1.4 mL) and 4-methoxybenzenethiol (16.8 mg, 0.12 mmol). The resulting mixture was stirred at 110 °C for 13 h. The mixture was diluted with EtOAc (10 mL) and washed with water (5 mL × 3). The organic layer was dried over Na<sub>2</sub>SO<sub>4</sub> and concentrated under reduced pressure. The residue

was purified by flash column chromatography on silica gel to afford the title compound **7** as a white solid (23.7 mg, 59%).

$R_f$  0.2 (hexane/EtOAc = 20/1); m.p. 108.9-1102.4 °C;  $^1\text{H}$  NMR (600 MHz,  $\text{CDCl}_3$ )  $\delta$  7.58 (s, 1H), 7.40-7.35 (m, 5H), 7.35-7.31 (m, 3H), 6.87-6.84 (m, 2H), 3.81 (s, 3H), 1.78 (s, 3H);  $^{13}\text{C}\{^1\text{H}\}$  NMR (151 MHz,  $\text{CDCl}_3$ )  $\delta$  160.1, 140.5, 136.3, 135.7, 134.3, 134.1, 131.1, 129.2, 128.8, 128.3, 122.5, 114.7, 93.9, 55.3, 19.8; HRMS (EI)  $m/z$ :  $[\text{M}]^+$  calcd for  $\text{C}_{19}\text{H}_{17}\text{BrN}_2\text{OS}$  400.0239; found, 400.0251.

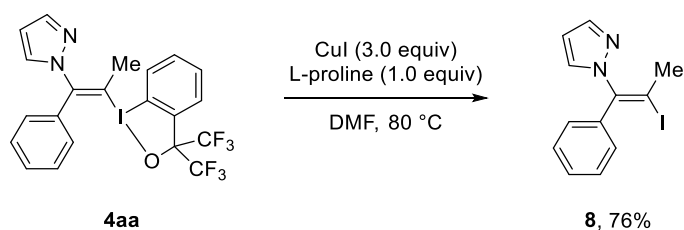

**(E)-1-(2-Iodo-1-phenylprop-1-en-1-yl)-1H-pyrazole (8):** Under an argon atmosphere, a 4 mL vial equipped with a stir bar was charged with **4aa** (82.8 mg, 0.15 mmol), CuI (85.7 mg, 0.45 mmol), L-proline (17.3 mg, 0.15 mmol), and DMF (1.5 mL). The resulting mixture was then placed on an aluminum block preheated at 80 °C and stirred for 14 h. The mixture was cooled to room temperature, diluted with EtOAc (10 mL), and washed with  $\text{H}_2\text{O}$  (5 mL) and brine (5 mL). The organic layer was dried over  $\text{Na}_2\text{SO}_4$  and concentrated under reduced pressure. The residue was purified by flash column chromatography on silica gel to afford the title compound **8** as a colorless oil (35.3 mg, 76%).

$R_f$  0.3 (hexane/EtOAc = 20/1);  $^1\text{H}$  NMR (600 MHz,  $\text{CDCl}_3$ )  $\delta$  7.64-7.61 (m, 1H), 7.38-7.32 (m, 6H), 6.33-6.30 (m, 1H), 2.62 (s, 3H);  $^{13}\text{C}\{^1\text{H}\}$  NMR (151 MHz,  $\text{CDCl}_3$ )  $\delta$  141.1, 140.2, 139.8, 130.7, 129.3, 128.9, 128.2, 106.2, 97.7, 30.5; HRMS (EI)  $m/z$ :  $[\text{M}]^+$  calcd for  $\text{C}_{12}\text{H}_{11}\text{IN}_2$  309.9961; found, 309.9975.

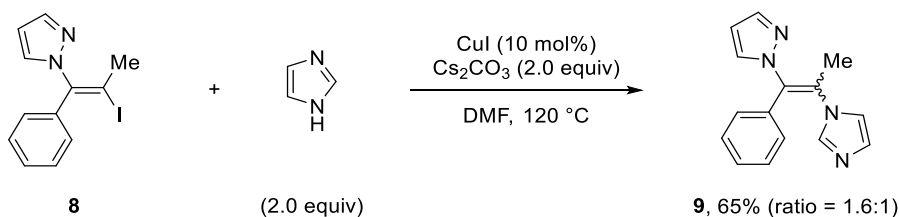

**1-(2-(1*H*-Imidazol-1-yl)-1-phenylprop-1-en-1-yl)-1*H*-pyrazole (9):** Under an argon atmosphere, a 4 mL vial equipped with a stir bar was charged with **8** (31.1 mg, 0.10 mmol), CuI (1.9 mg, 0.01 mmol, 10 mol %), Cs<sub>2</sub>CO<sub>3</sub> (65.2 mg, 0.2 mmol), imidazole (13.6 mg, 0.2 mmol), and DMF (0.5 mL). The resulting mixture was stirred at room temperature for 15 h. The mixture was diluted with Et<sub>2</sub>O (10 mL) and washed with H<sub>2</sub>O (5 mL) and brine (5 mL). The organic layer was dried over Na<sub>2</sub>SO<sub>4</sub> and concentrated under reduced pressure. The residue was purified by flash column chromatography on silica gel to afford the title compound **9** as a yellow solid (16.3 mg, 65%, stereoisomer ratio = 1.6:1).

*R*<sub>f</sub> 0.3 (hexane/EtOAc = 4/1); m.p. 113.2-115.4 °C; <sup>1</sup>H NMR (600 MHz, CDCl<sub>3</sub>, major) δ 7.74-7.72 (m, 1H), 7.44-7.37 (m, 2H), 7.24-7.17 (m, 3H), 7.06-7.03 (m, 1H), 6.95-6.91 (m, 1H), 6.84-6.80 (m, 2H), 6.44-6.42 (m, 1H), 2.21 (s, 3H); <sup>13</sup>C{<sup>1</sup>H} NMR (151 MHz, CDCl<sub>3</sub>, major) δ 140.7, 137.0, 134.6, 134.4, 131.2, 129.8, 129.5, 129.0, 128.7, 127.9, 118.8, 107.0, 20.2; <sup>1</sup>H NMR (600 MHz, CDCl<sub>3</sub>, minor) δ 7.57-7.55 (m, 1H), 7.44-7.37 (m, 3H), 7.31-7.28 (m, 3H), 7.10 (d, *J* = 2.4 Hz, 1H), 7.02-6.99 (m, 1H), 6.78-6.75 (m, 1H), 6.23-6.21 (m, 1H), 2.39 (s, 3H); <sup>13</sup>C{<sup>1</sup>H} NMR (151 MHz, CDCl<sub>3</sub>, minor) δ 141.2, 136.4, 135.1, 132.2, 130.8, 130.1, 129.2, 129.1, 128.7, 127.4, 118.2, 107.2, 20.0; HRMS (EI) *m/z*: [M]<sup>+</sup> calcd for C<sub>15</sub>H<sub>14</sub>N<sub>4</sub> 250.1213; found, 250.1217.

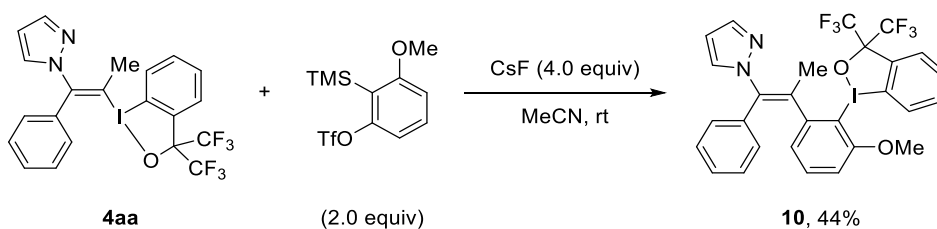

**(*E*)-1-(2-(2-(3,3-Bis(trifluoromethyl)-1λ<sup>3</sup>-benzo[*d*][1,2]iodaoxol-1(3*H*)-yl)-3-**

**methoxyphenyl)-1-phenylprop-1-en-1-yl)-1*H*-pyrazole (10):** Under an argon atmosphere, a 4 mL vial equipped with a stir bar was charged sequentially with **4aa** (55.2 mg, 0.10 mmol) and MeCN (0.5 mL), followed by the addition of 3-methoxy-2-(trimethylsilyl)phenyl trifluoromethanesulfonate (65.7 mg, 0.20 mmol) and cesium fluoride (60.8 mg, 0.40 mmol). The resulting mixture was stirred at room temperature for 18 h. The reaction mixture was filtered through a silica plug with EtOAc as eluent and concentrated under reduced pressure. The residue was purified by flash chromatography on silica gel to afford the title compound **10** as a yellow solid (29.0 mg, 44%).

*R*<sub>f</sub> 0.32 (hexane/EtOAc = 1/1); m.p. 145.8-148.0 °C; <sup>1</sup>H NMR (600 MHz, CDCl<sub>3</sub>) δ 8.11 (dd, *J* = 7.8 Hz, 1.2 Hz, 1H), 7.85 (d, *J* = 7.2 Hz, 1H), 7.72 (d, *J* = 2.4 Hz, 1H), 7.70-7.63 (m, 2H), 7.43 (t, *J* = 8.4 Hz, 1H), 7.18 (d, *J* = 3.0 Hz, 1H), 7.13-7.09 (m, 2H), 7.01 (t, *J* = 7.8 Hz, 2H), 6.94 (d, *J* = 7.2 Hz, 1H), 6.65-6.62 (m, 2H), 6.28 (t, *J* = 1.8 Hz, 1H), 4.04 (s, 3H), 2.52 (s, 3H); <sup>13</sup>C{<sup>1</sup>H} NMR (151 MHz, CDCl<sub>3</sub>) δ 156.1, 148.0, 141.4, 140.7, 139.5, 132.1, 132.0, 130.4, 130.3, 130.2, 129.8, 129.4, 128.3, 128.0, 127.5, 124.8, 124.6, 124.1 (q, *J* = 292.0 Hz), 124.0 (q, *J* = 290.2 Hz), 118.7, 111.0, 110.9, 106.8, 81.2-80.7 (m), 56.2, 25.7; <sup>19</sup>F NMR (565 MHz, CDCl<sub>3</sub>) δ -75.8 (q, *J* = 8.5 Hz), -76.0 (q, *J* = 8.6 Hz); HRMS (FAB) *m/z*: [M+K]<sup>+</sup> calcd for C<sub>28</sub>H<sub>21</sub>F<sub>6</sub>IKN<sub>2</sub>O<sub>2</sub> 697.0183; found, 697.0204.

#### 4. References

- (1) Ding, W.; Chai, J.; Wang, C.; Wu, J.; Yoshikai, N. *J. Am. Chem. Soc.* **2020**, *142*, 8619-8624.
- (2) (a) Roesch, K. R.; Larock, R. C. *J. Org. Chem.* **2001**, *66*, 412-420. (b) Lu, B.; Li, C.; Zhang L. *J. Am. Chem. Soc.* **2010**, *132*, 14070-14072.
- (3) Peng, B.; Huang, X. L.; Xie, L. G.; Maulide, N. *Angew. Chem. Int. Ed.* **2014**, *53*, 8718-8721.

## 5. NMR Spectra

$^1\text{H}$  NMR (600 MHz,  $\text{CDCl}_3$ ) and  $^{13}\text{C}\{^1\text{H}\}$  NMR (151 MHz,  $\text{CDCl}_3$ ) spectra of **4aa**

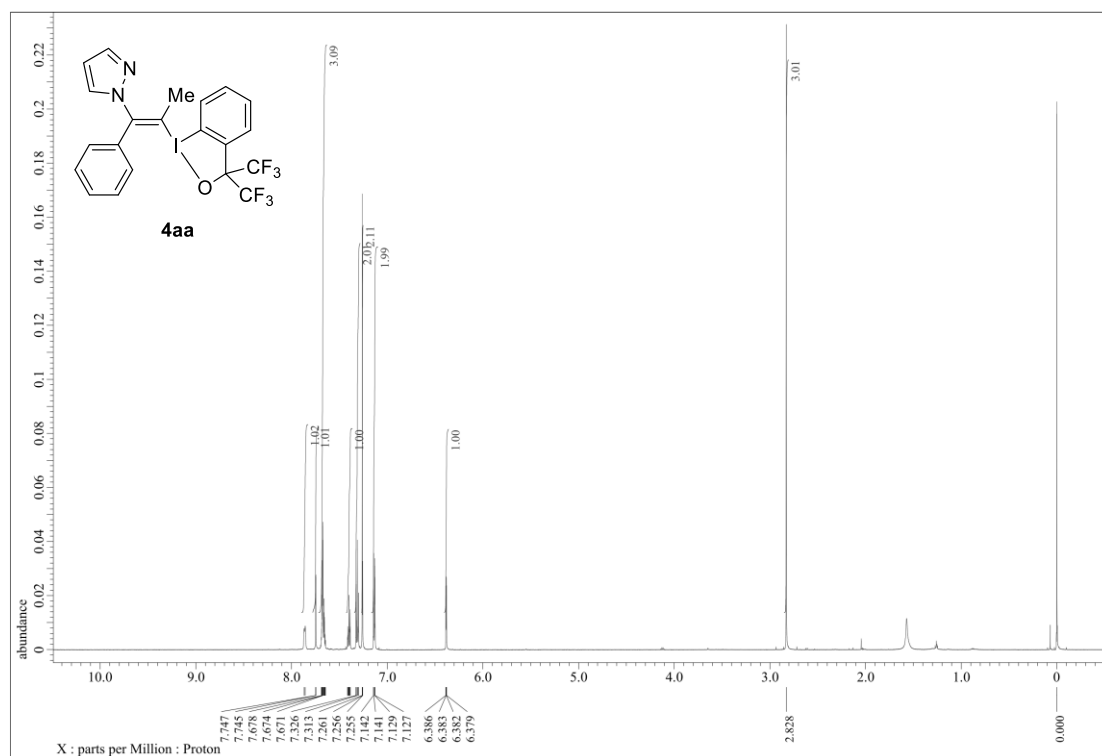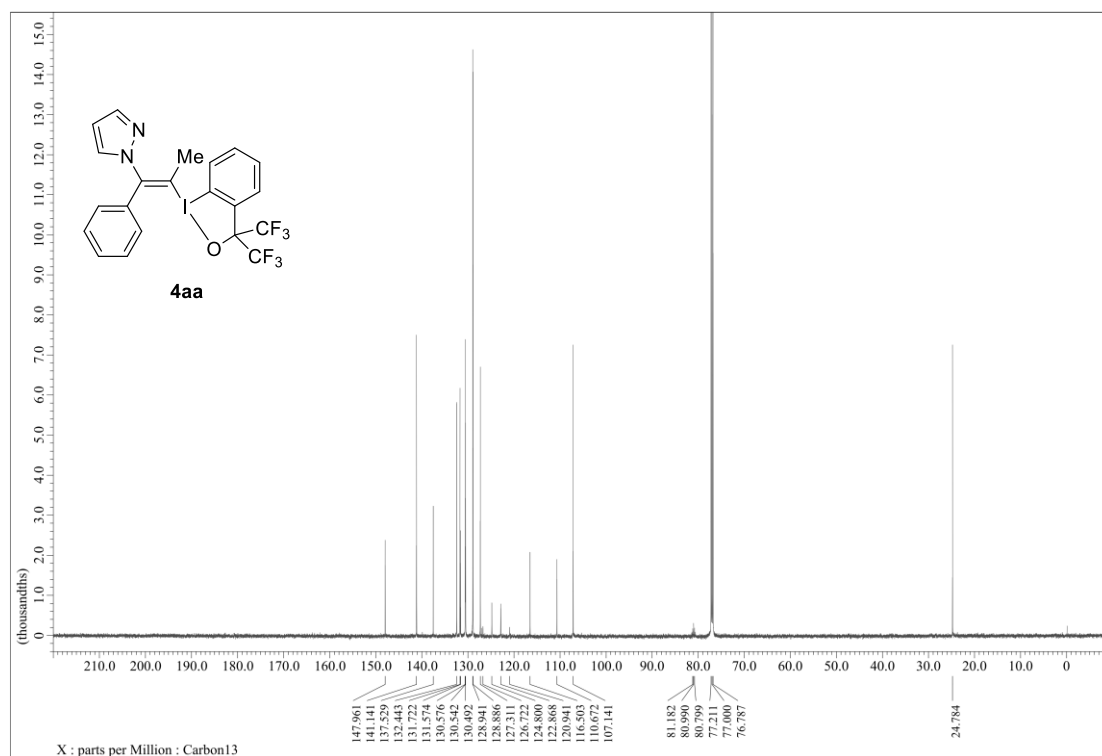

$^{19}\text{F}\{^1\text{H}\}$  NMR (565 MHz,  $\text{CDCl}_3$ ) spectrum of **4aa**

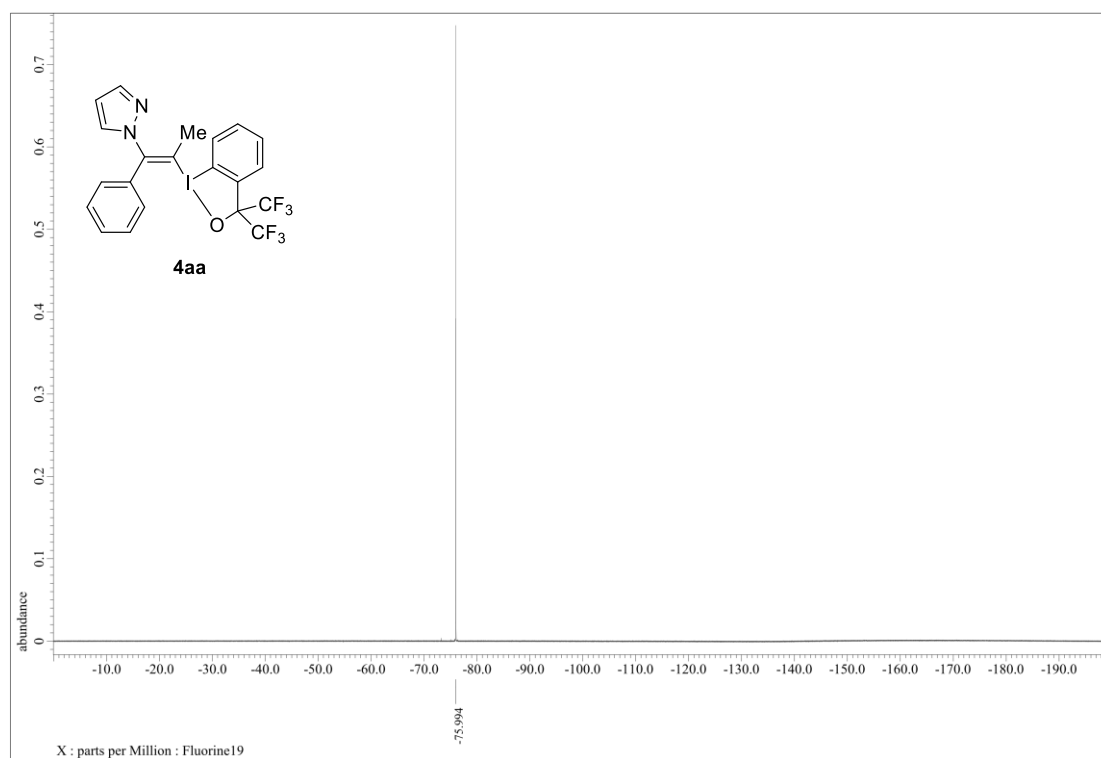

$^1\text{H}$  NMR (600 MHz,  $\text{CDCl}_3$ ) and  $^{13}\text{C}\{^1\text{H}\}$  NMR (151 MHz,  $\text{CDCl}_3$ ) spectra of **4ba**

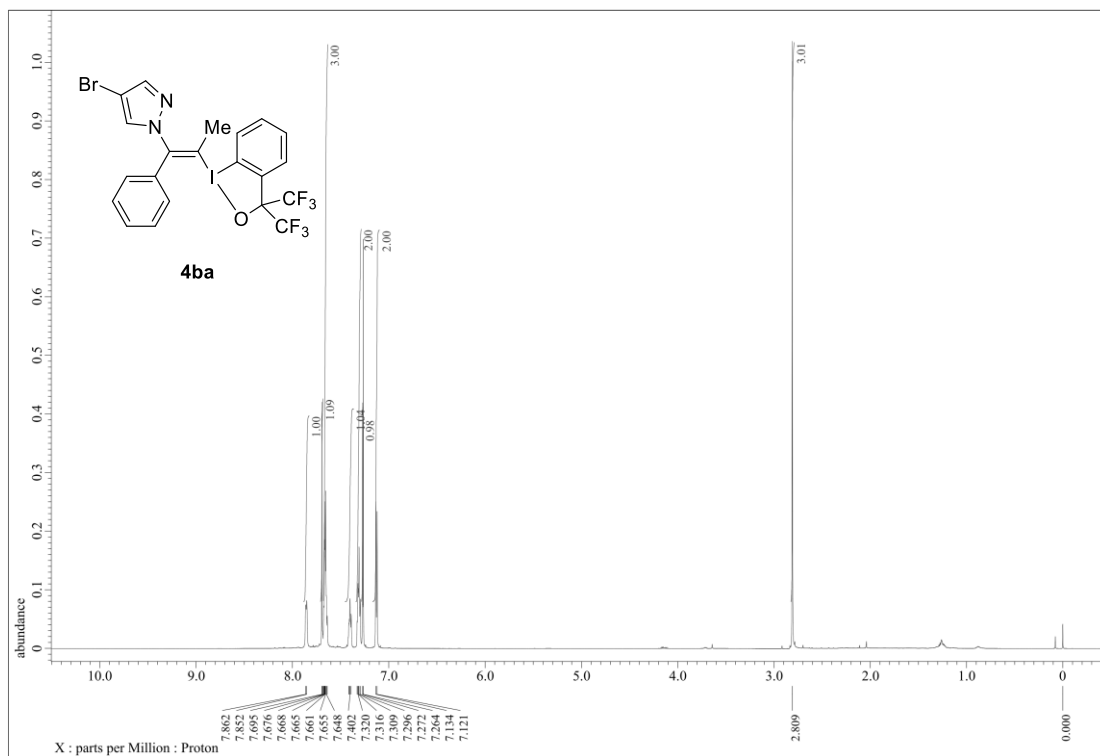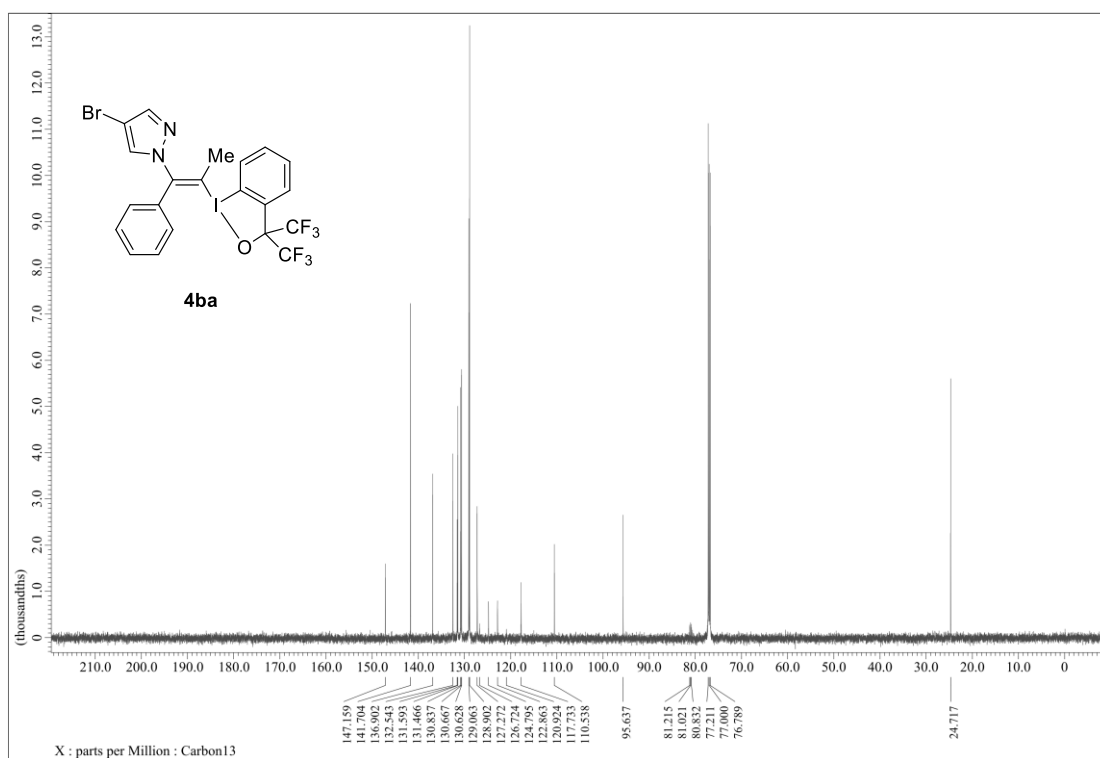

$^{19}\text{F}\{^1\text{H}\}$  NMR (565 MHz,  $\text{CDCl}_3$ ) spectrum of **4ba**

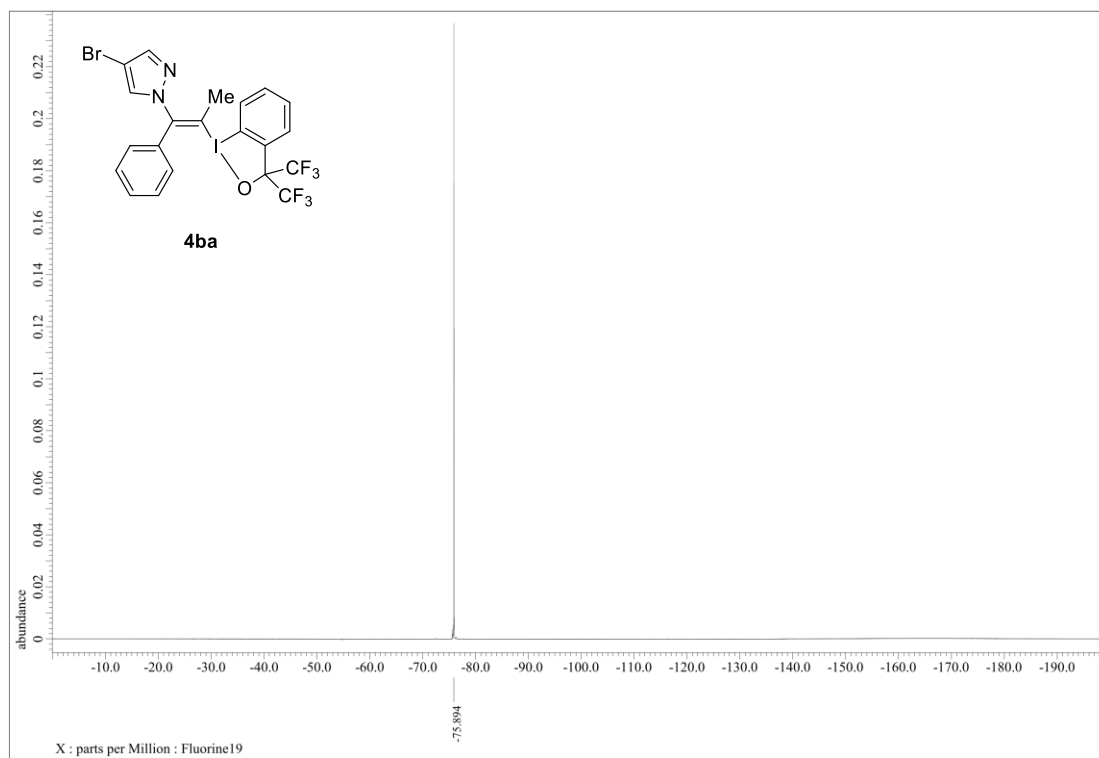

$^1\text{H}$  NMR (600 MHz,  $\text{CDCl}_3$ ) and  $^{13}\text{C}\{^1\text{H}\}$  NMR (151 MHz,  $\text{CDCl}_3$ ) spectra of **4ca**

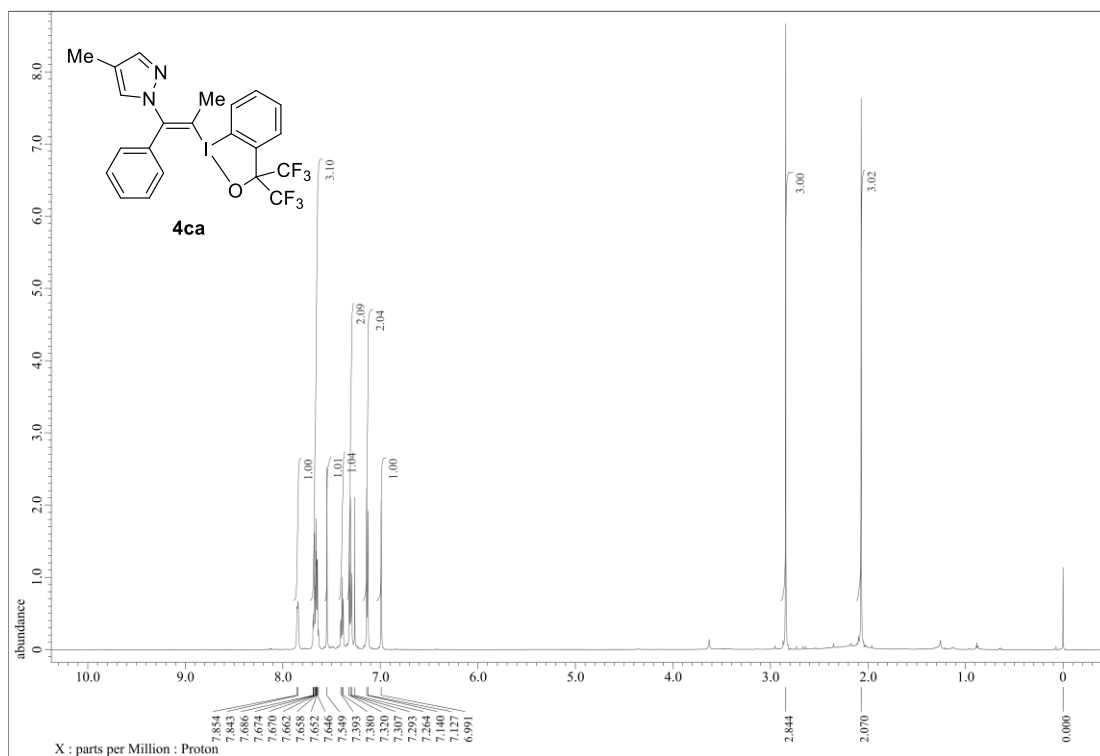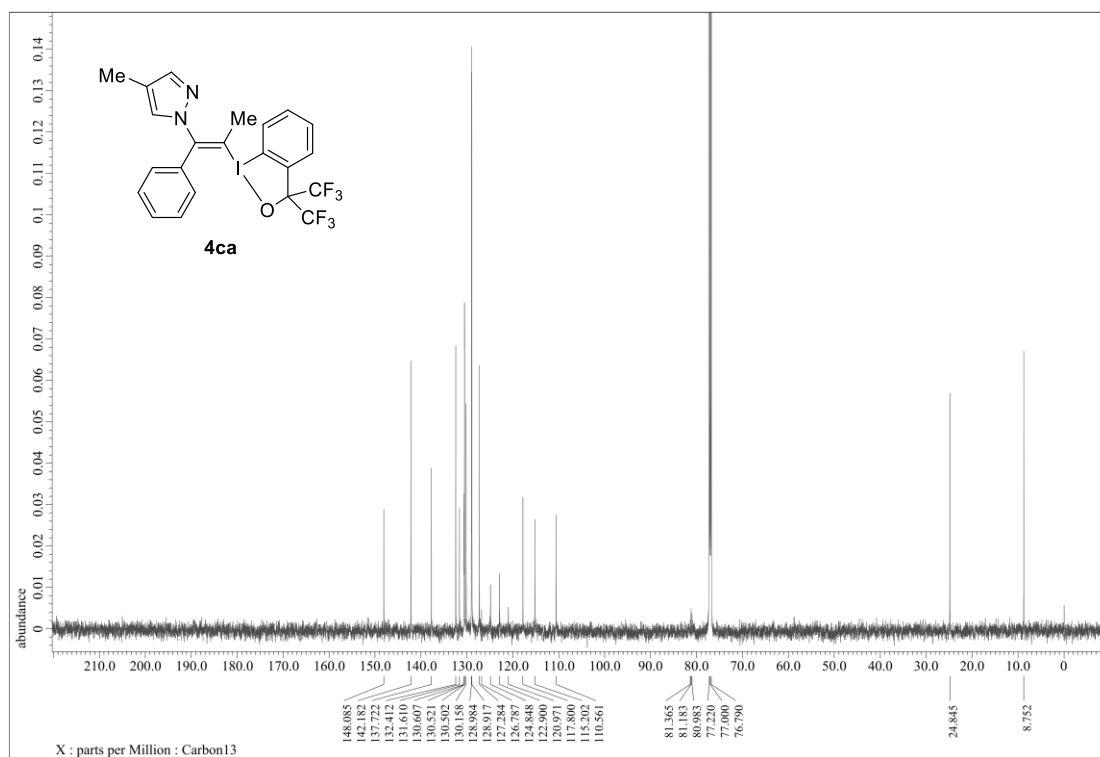

$^{19}\text{F}\{^1\text{H}\}$  NMR (565 MHz,  $\text{CDCl}_3$ ) spectrum of **4ca**

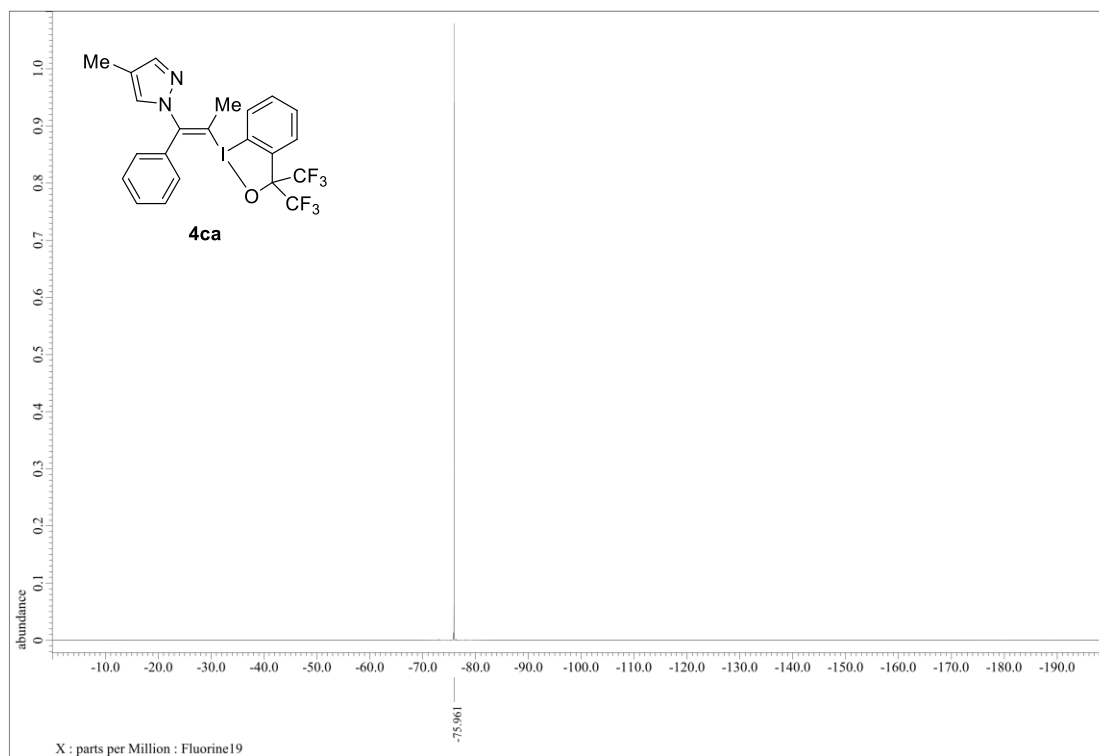

$^1\text{H}$  NMR (600 MHz,  $\text{CDCl}_3$ ) and  $^{13}\text{C}\{^1\text{H}\}$  NMR (151 MHz,  $\text{CDCl}_3$ ) spectra of **4da**

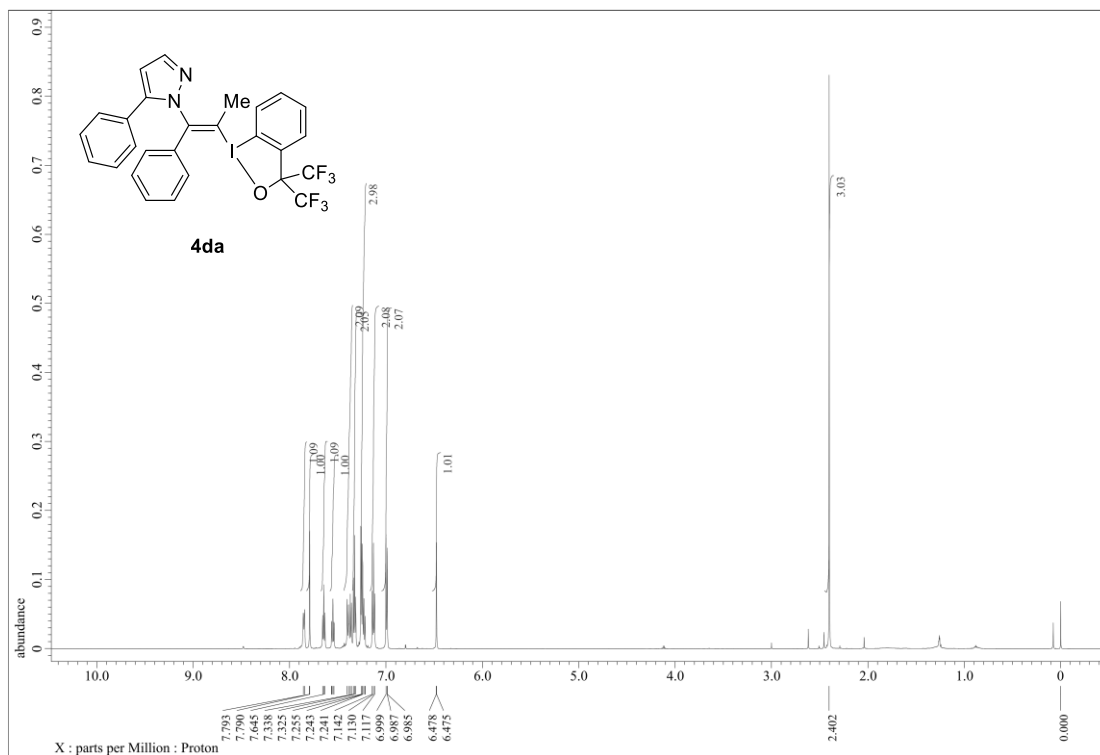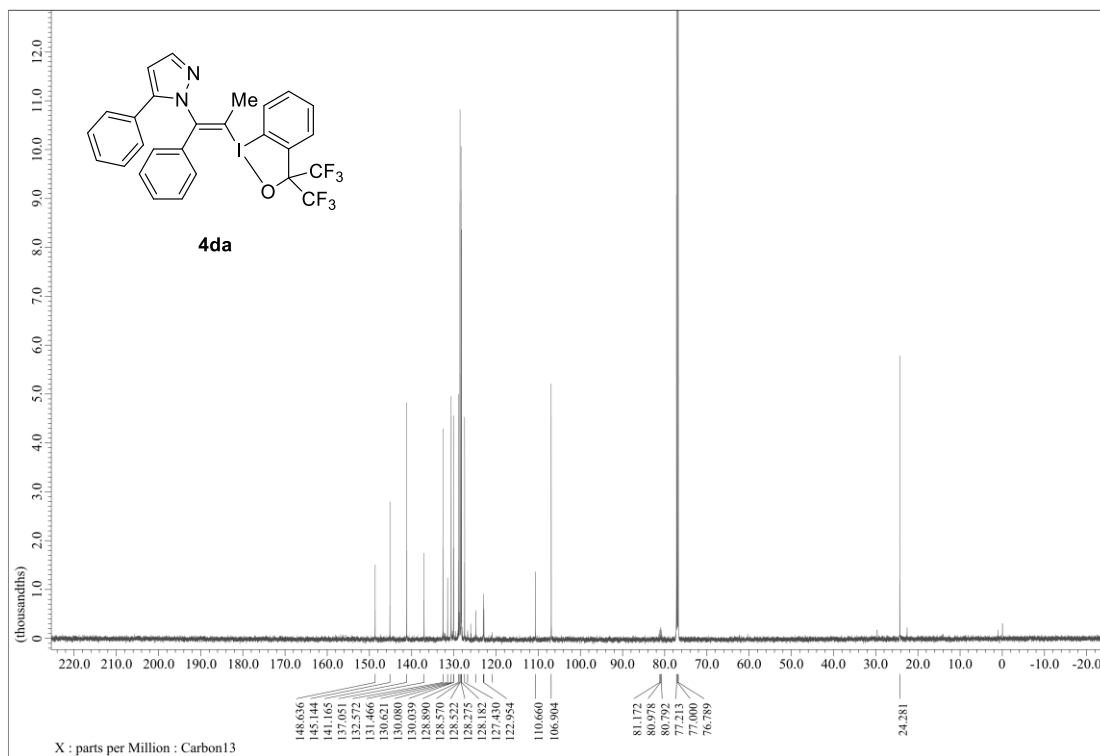

$^{19}\text{F}\{^1\text{H}\}$  NMR (565 MHz,  $\text{CDCl}_3$ ) spectrum of **4da**

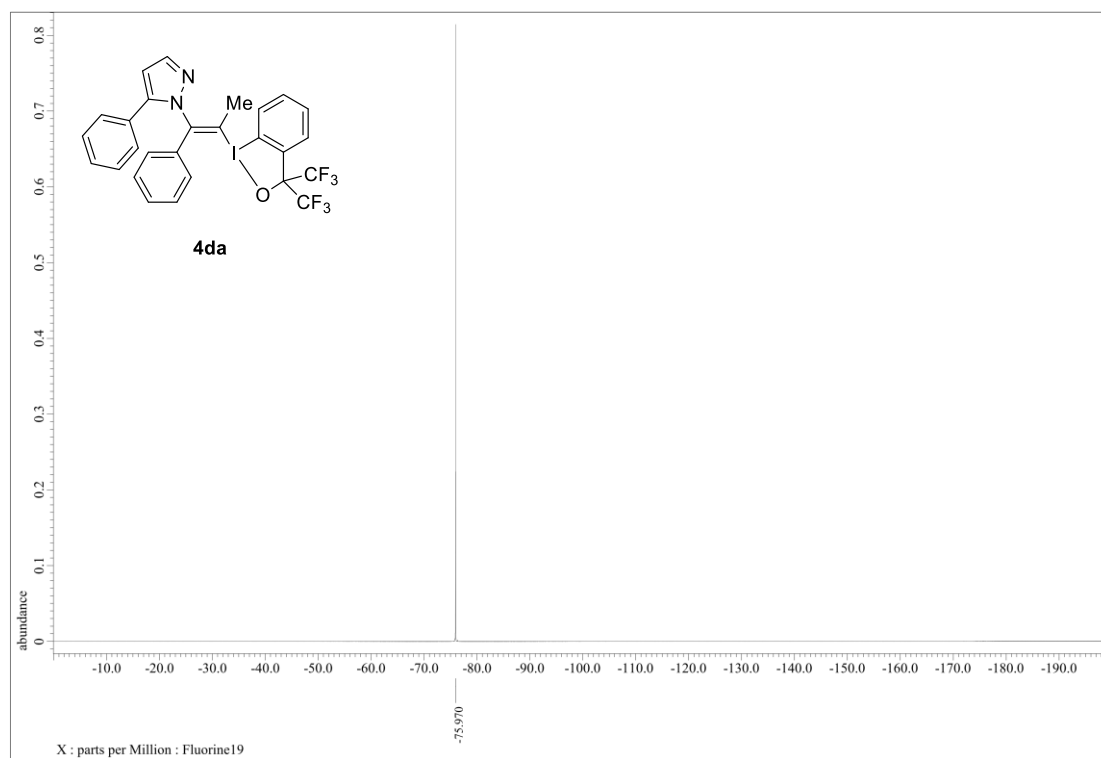

$^1\text{H}$  NMR (600 MHz,  $\text{CDCl}_3$ ) and  $^{13}\text{C}\{^1\text{H}\}$  NMR (151 MHz,  $\text{CDCl}_3$ ) spectra of **4da'**

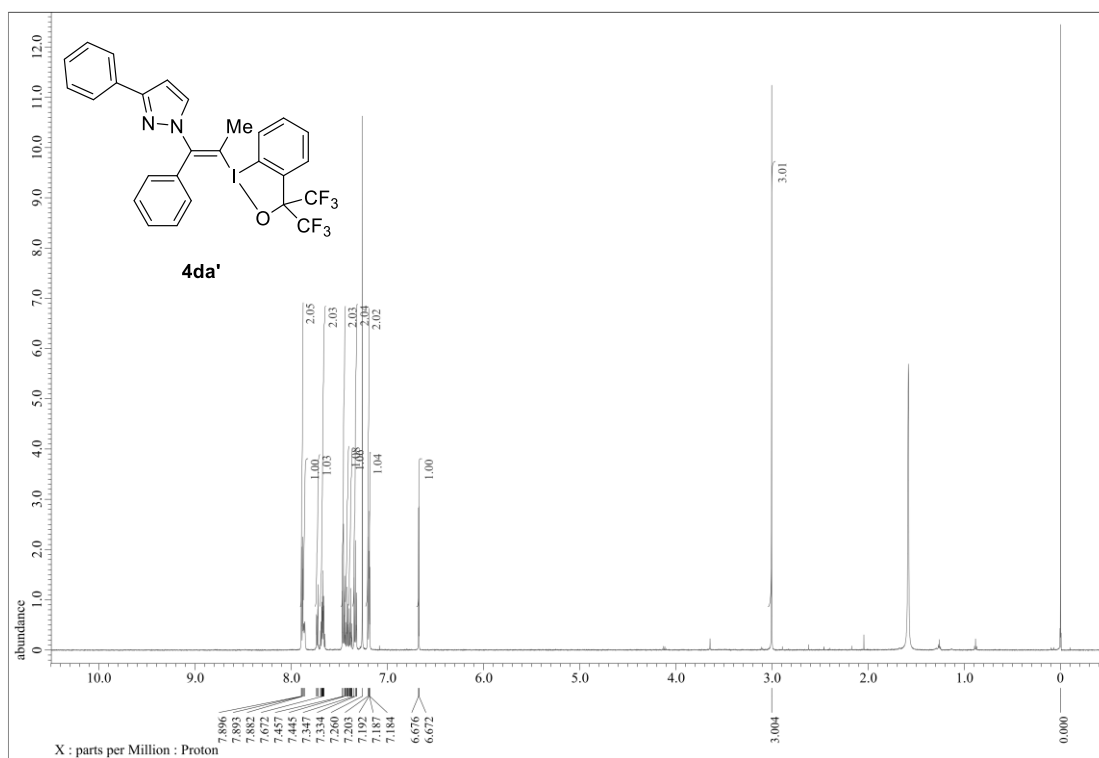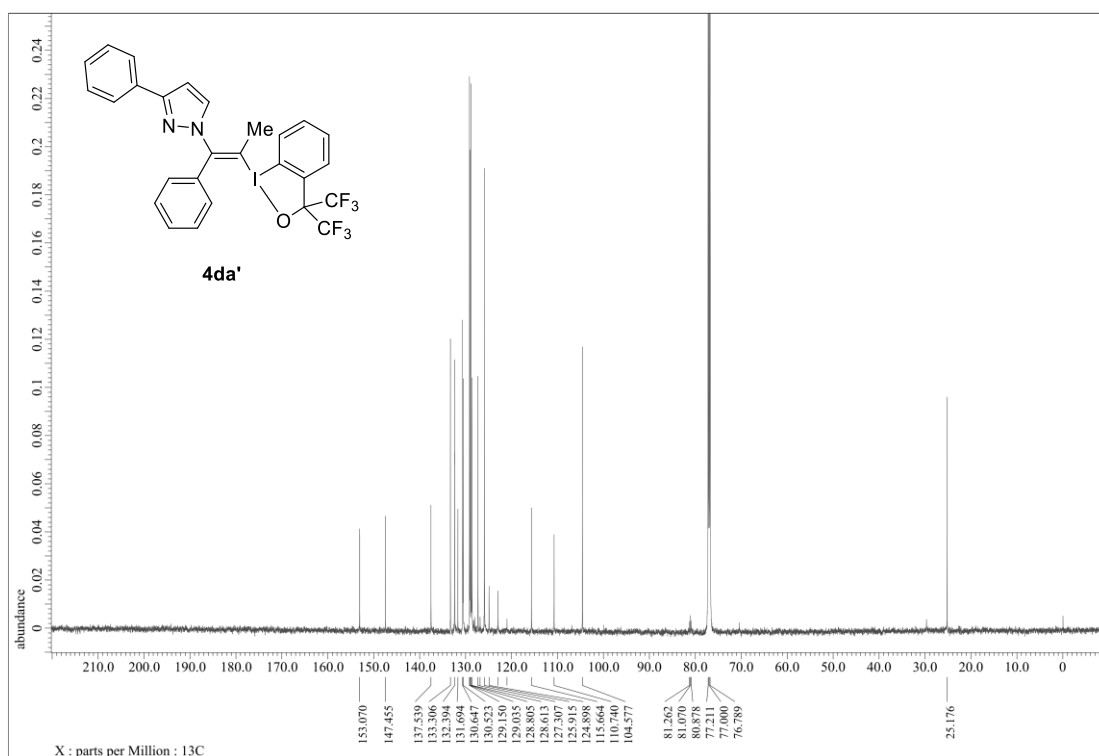

$^{19}\text{F}\{^1\text{H}\}$  NMR (565 MHz,  $\text{CDCl}_3$ ) spectrum of **4da'**

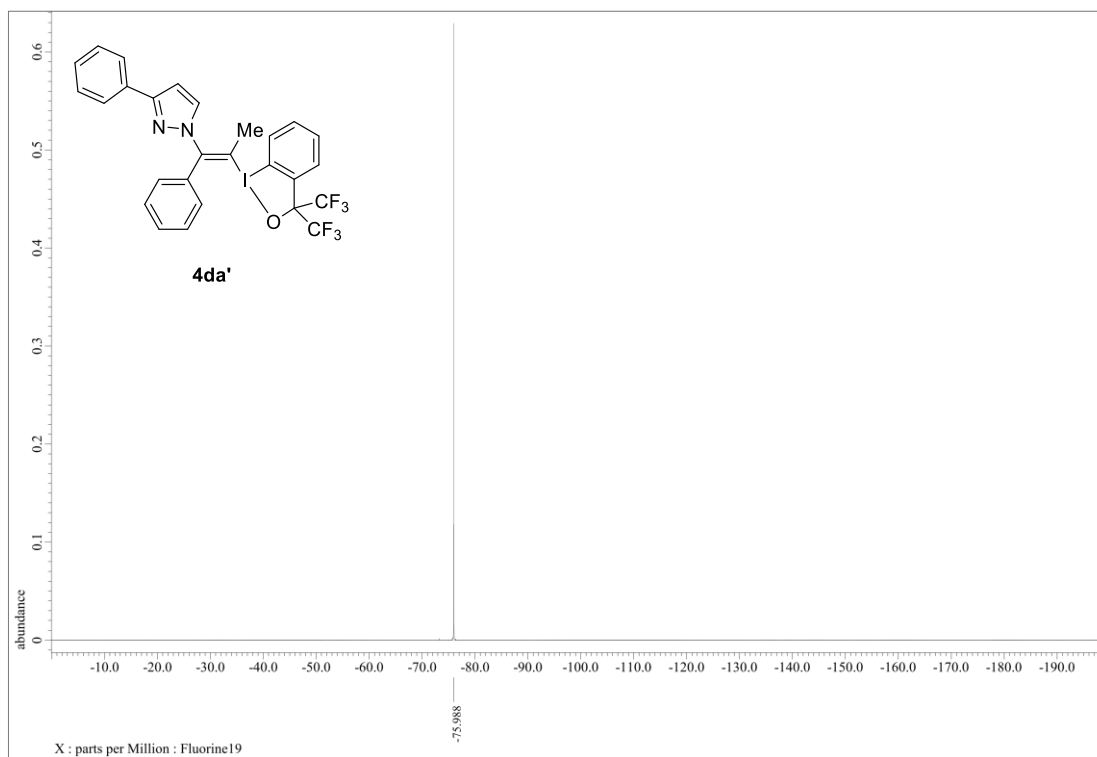

$^1\text{H}$  NMR (600 MHz,  $\text{CDCl}_3$ ) and  $^{13}\text{C}\{^1\text{H}\}$  NMR (151 MHz,  $\text{CDCl}_3$ ) spectra of **4ea**

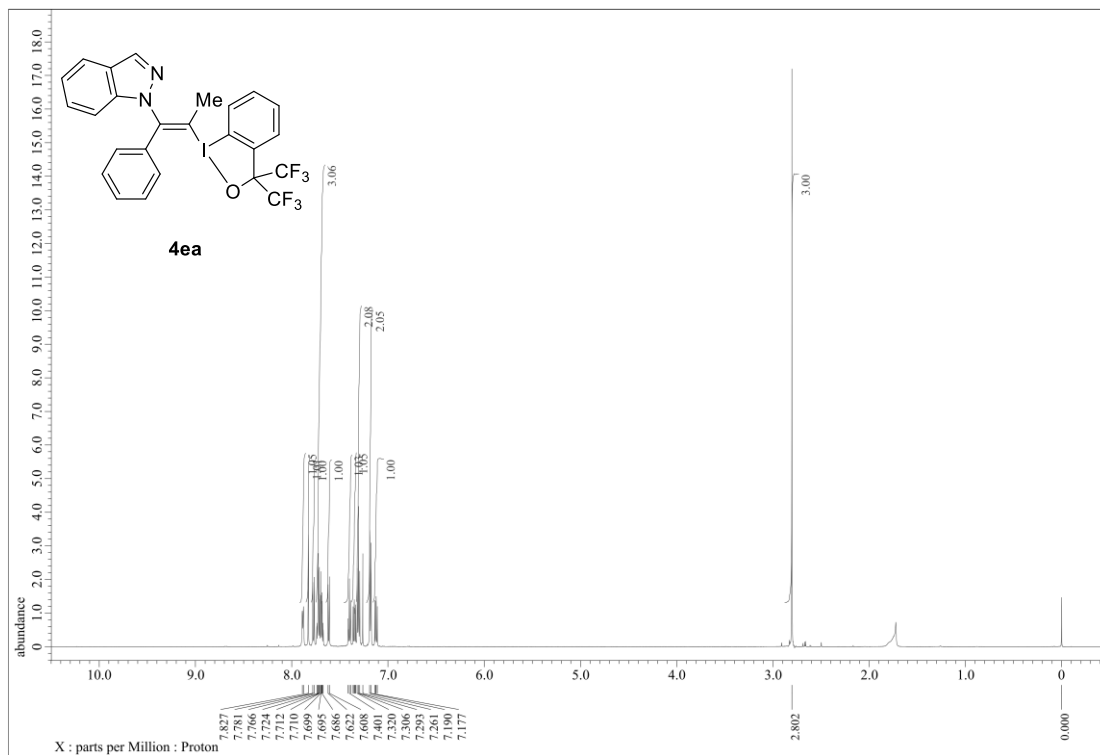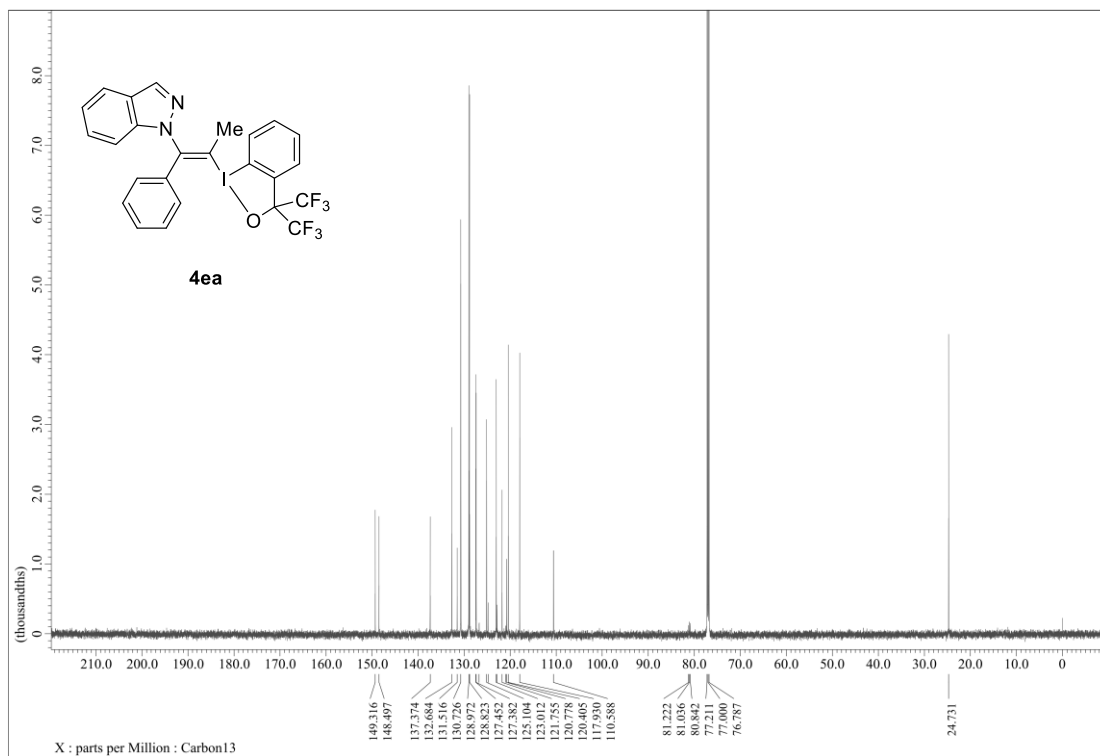

$^{19}\text{F}\{^1\text{H}\}$  NMR (565 MHz,  $\text{CDCl}_3$ ) spectrum of **4ea**

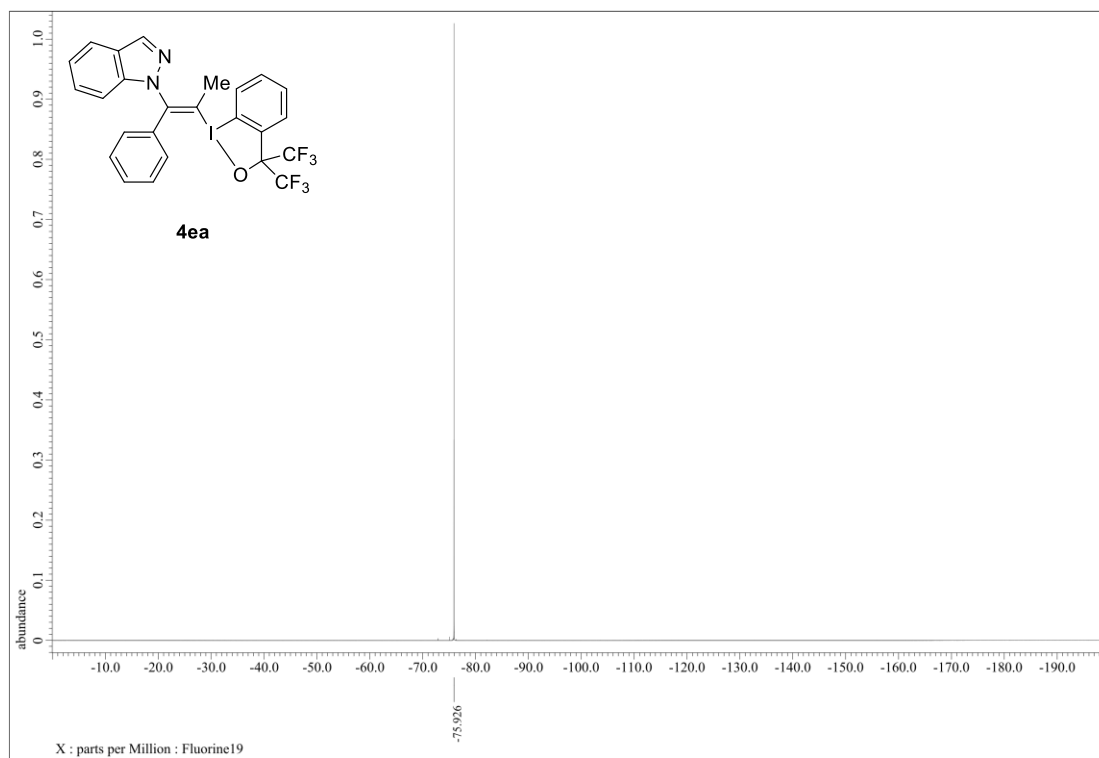

$^1\text{H}$  NMR (600 MHz,  $\text{CDCl}_3$ ) and  $^{13}\text{C}\{^1\text{H}\}$  NMR (151 MHz,  $\text{CDCl}_3$ ) spectra of **4fa**

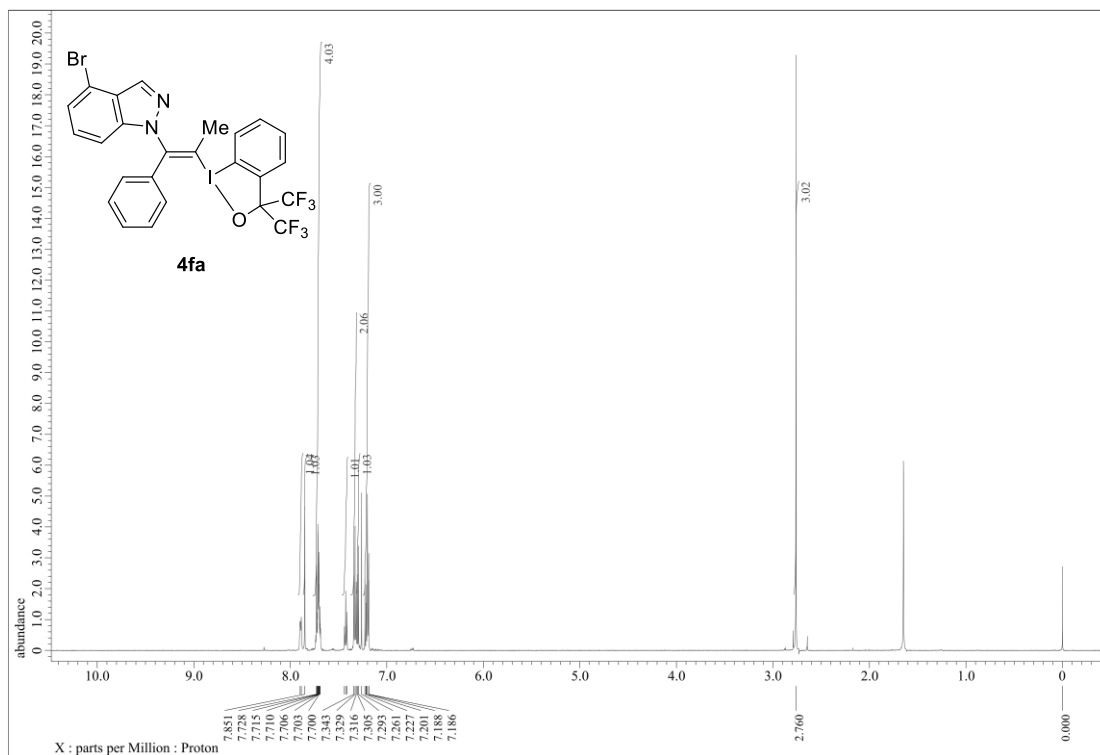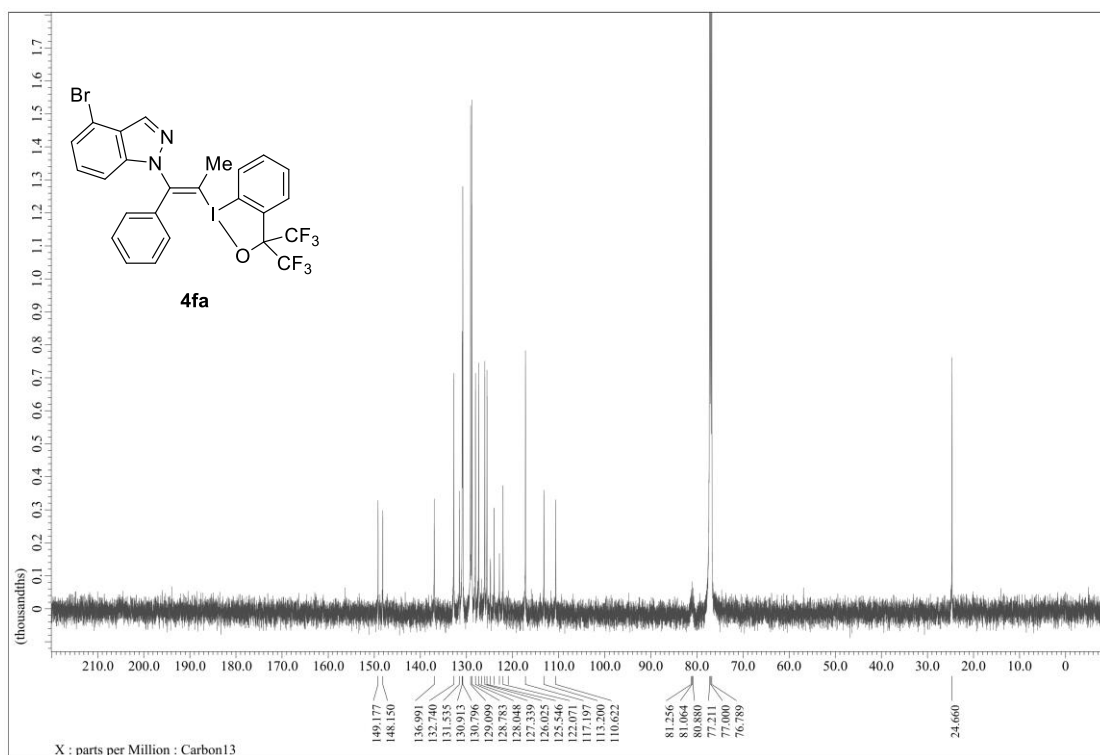

$^{19}\text{F}\{^1\text{H}\}$  NMR (565 MHz,  $\text{CDCl}_3$ ) spectrum of **4fa**

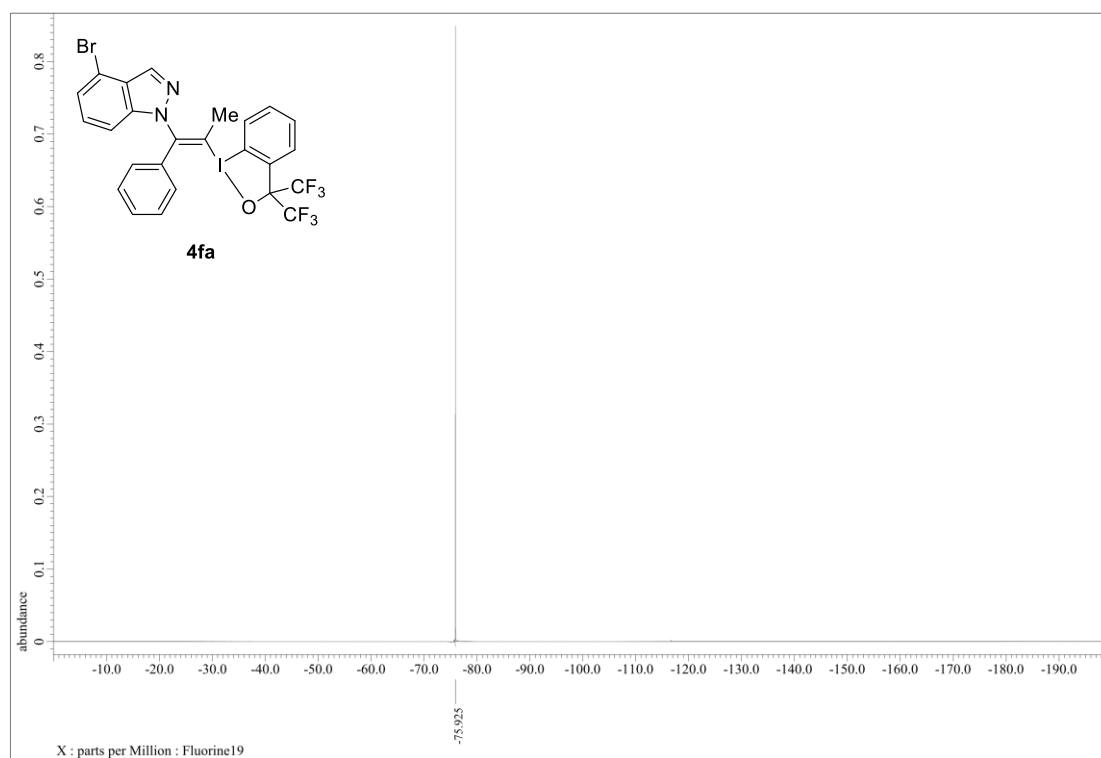

$^1\text{H}$  NMR (600 MHz,  $\text{CDCl}_3$ ) and  $^{13}\text{C}$   $\{^1\text{H}\}$  NMR (151 MHz,  $\text{CDCl}_3$ ) spectra of **4ga**

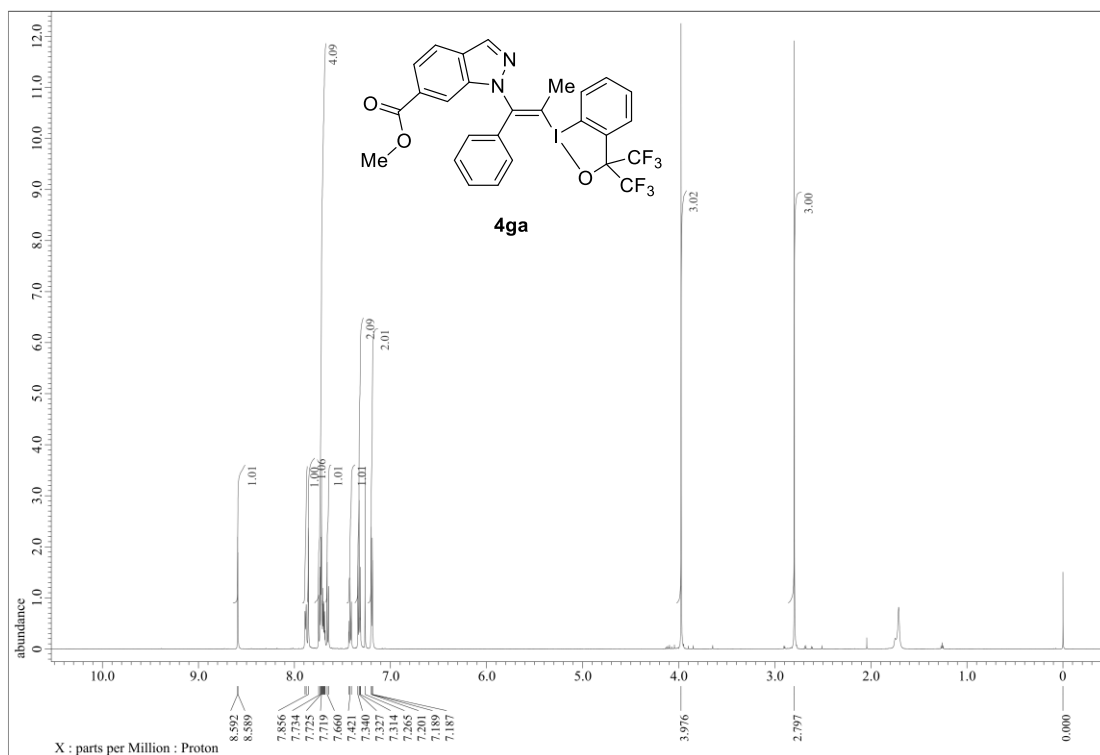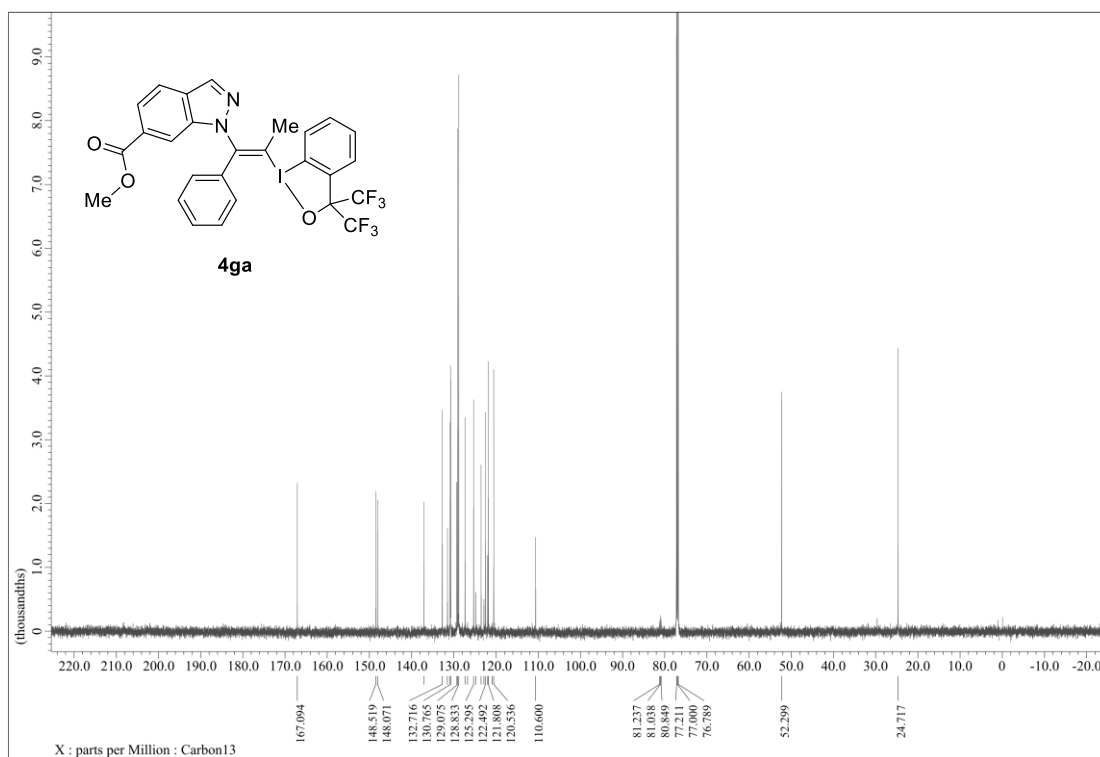

$^{19}\text{F}\{^1\text{H}\}$  NMR (565 MHz,  $\text{CDCl}_3$ ) spectrum of **4ga**

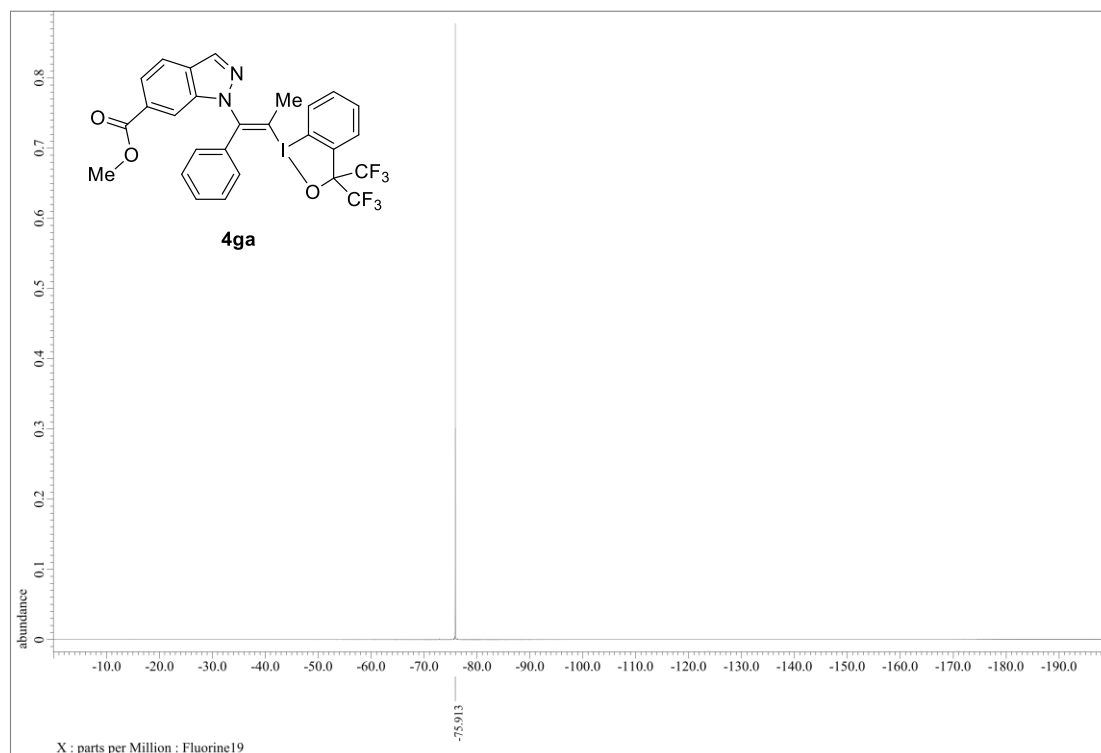

<sup>1</sup>H NMR (600 MHz, CDCl<sub>3</sub>) and <sup>13</sup>C{<sup>1</sup>H} NMR (151 MHz, CDCl<sub>3</sub>) spectra of **4ha**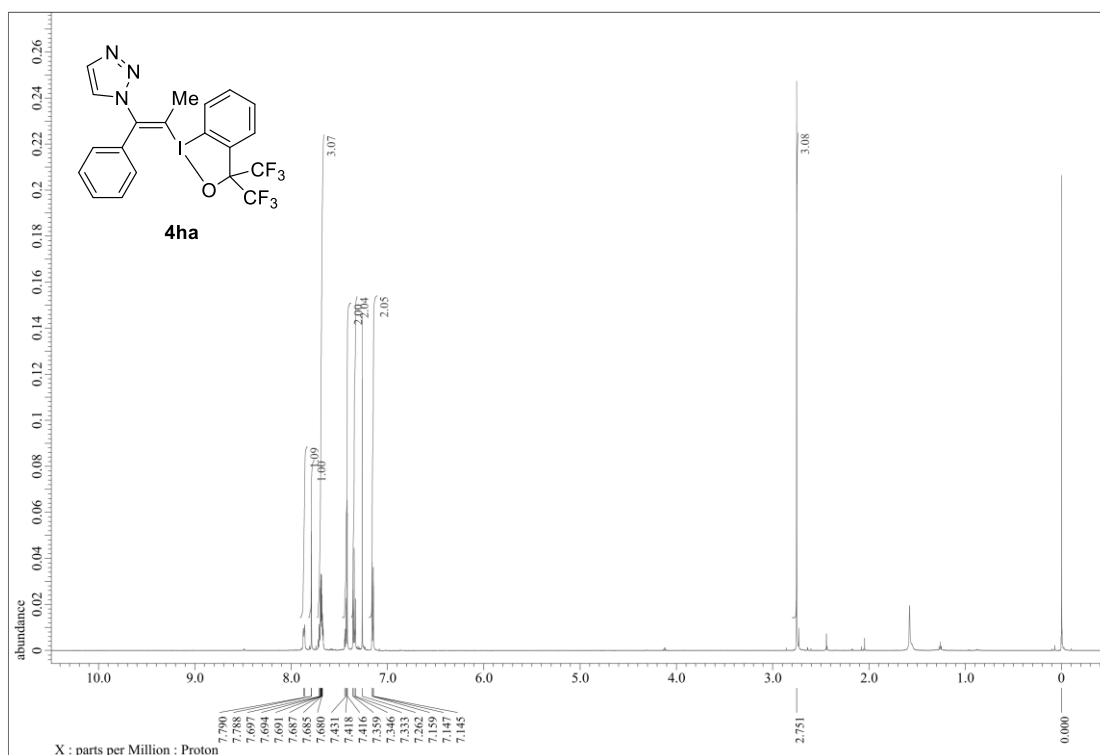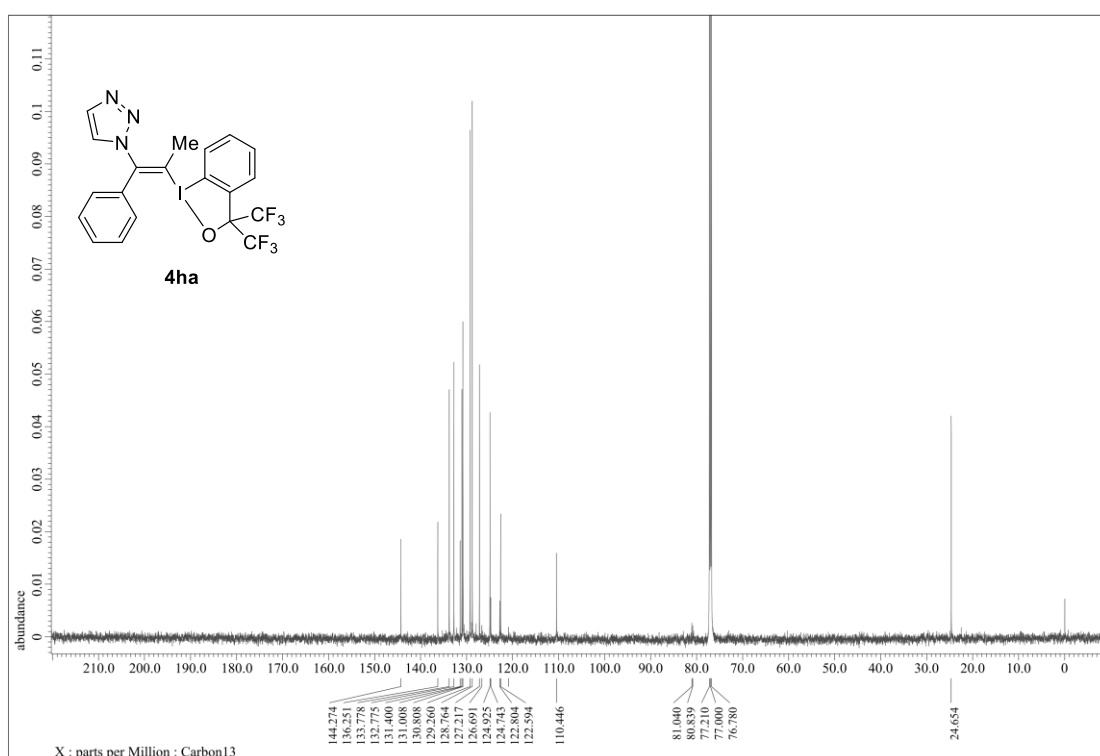

$^{19}\text{F}\{^1\text{H}\}$  NMR (565 MHz,  $\text{CDCl}_3$ ) spectrum of **4ha**

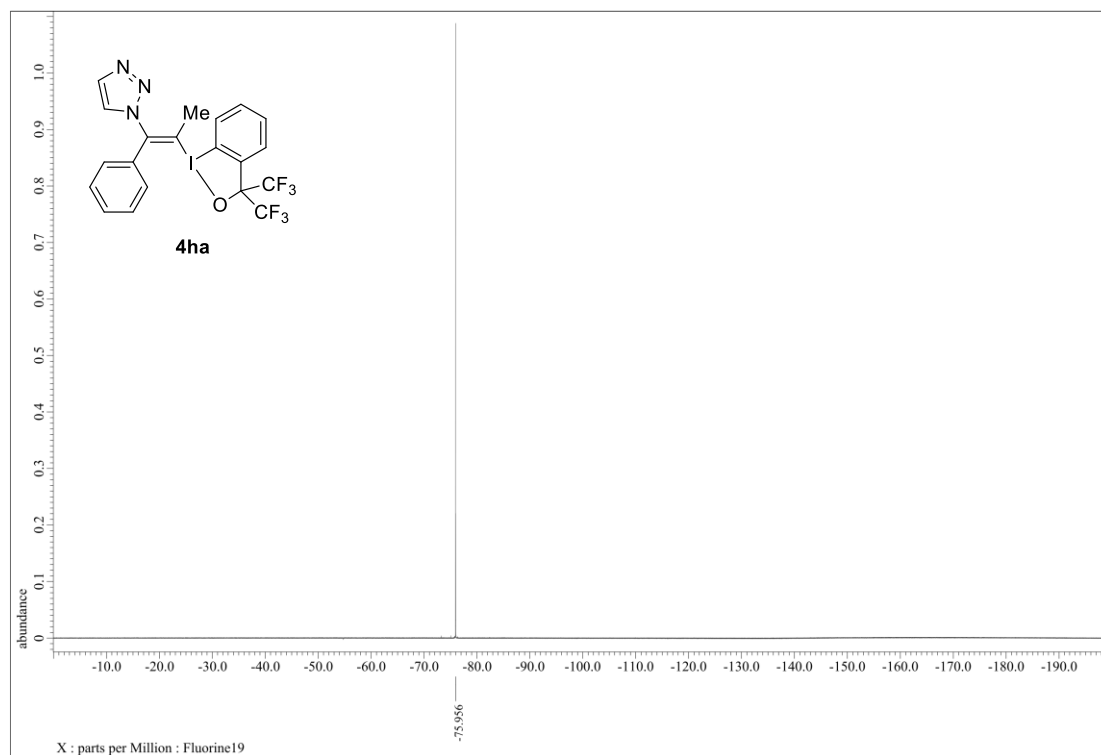

$^1\text{H}$  NMR (600 MHz,  $\text{CDCl}_3$ ) and  $^{13}\text{C}\{^1\text{H}\}$  NMR (151 MHz,  $\text{CDCl}_3$ ) spectra of **4ia**

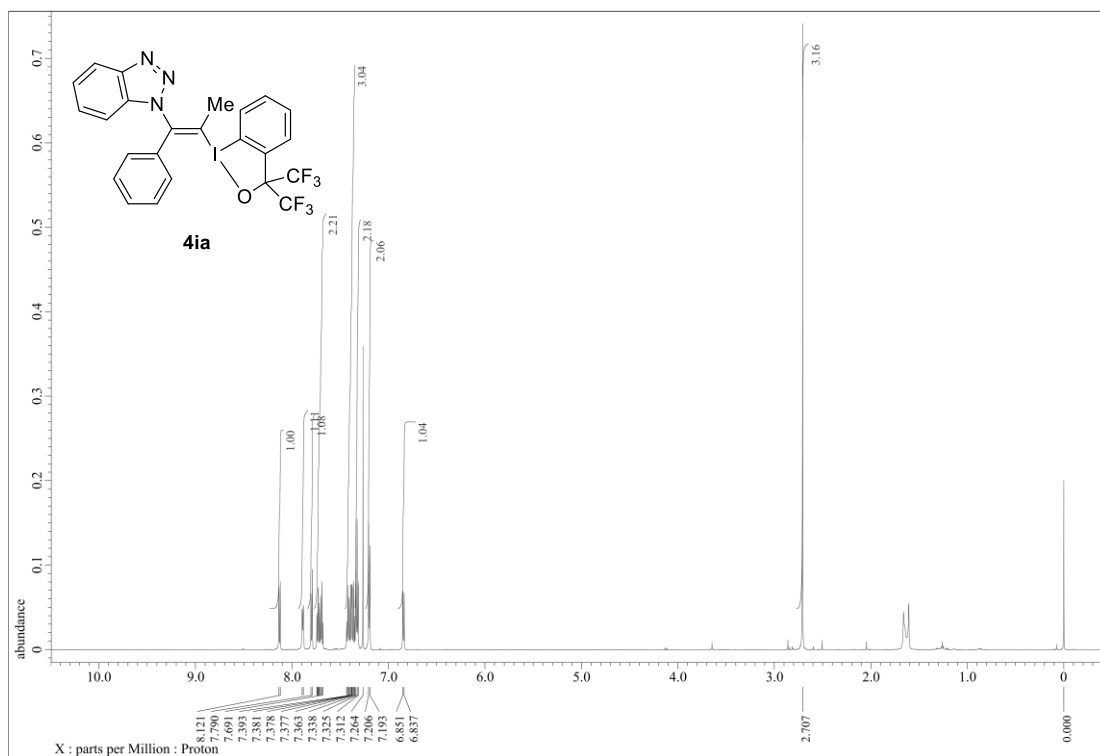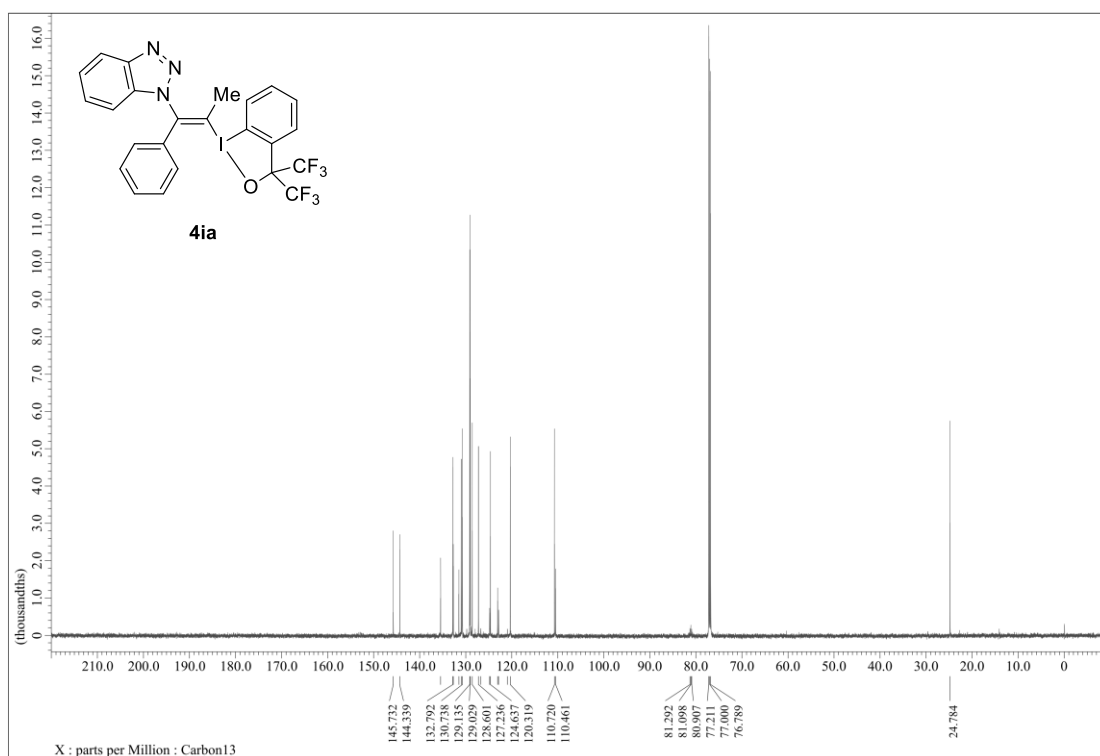

$^{19}\text{F}\{^1\text{H}\}$  NMR (565 MHz,  $\text{CDCl}_3$ ) spectrum of **4ia**

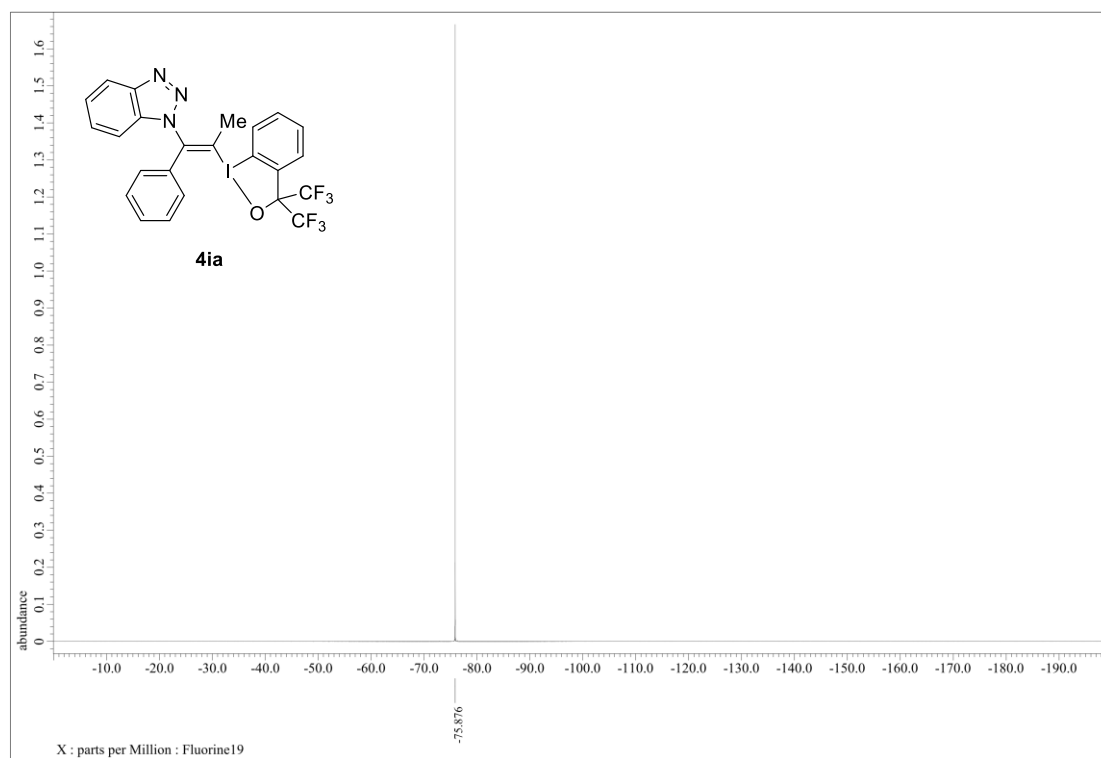

$^1\text{H}$  NMR (600 MHz,  $\text{CDCl}_3$ ) and  $^{13}\text{C}\{^1\text{H}\}$  NMR (151 MHz,  $\text{CDCl}_3$ ) spectra of **4ja**

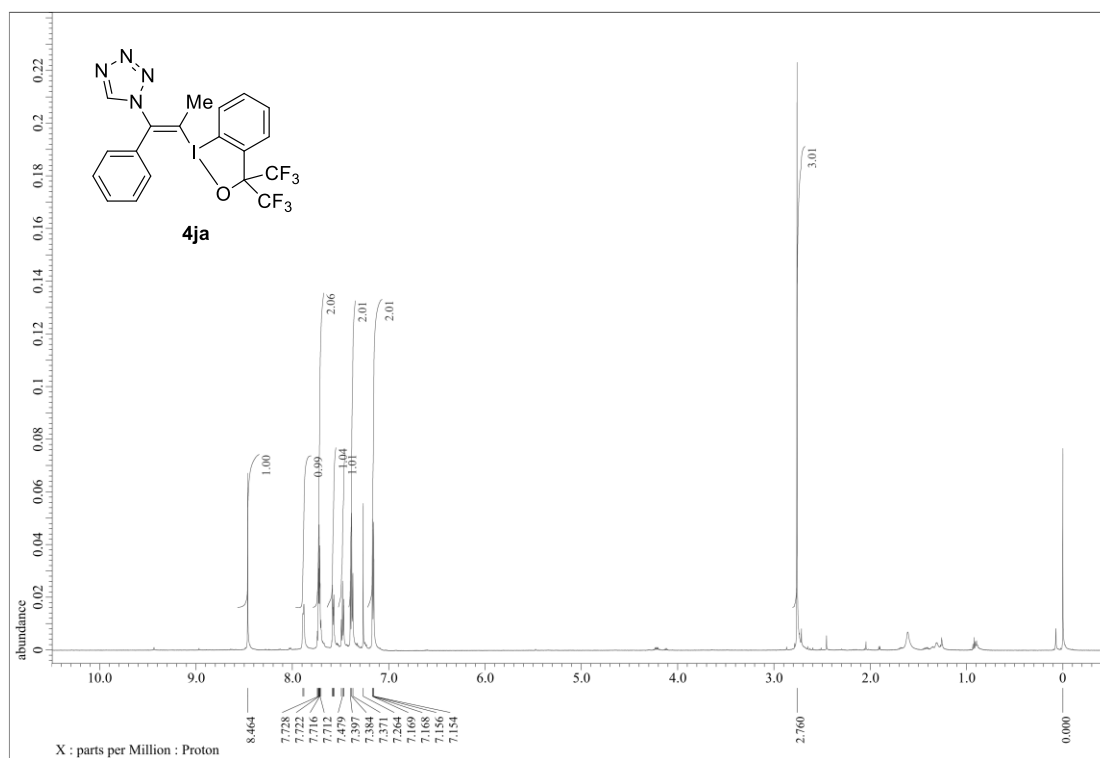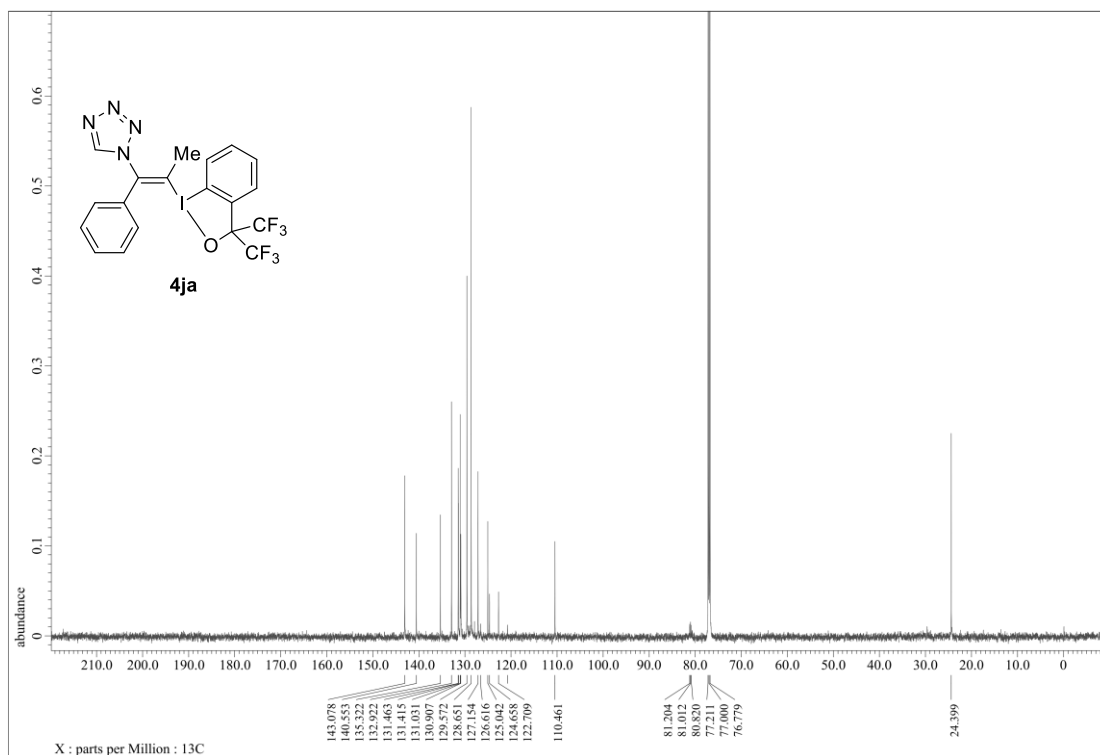

$^{19}\text{F}\{^1\text{H}\}$  NMR (565 MHz,  $\text{CDCl}_3$ ) spectrum of **4ja**

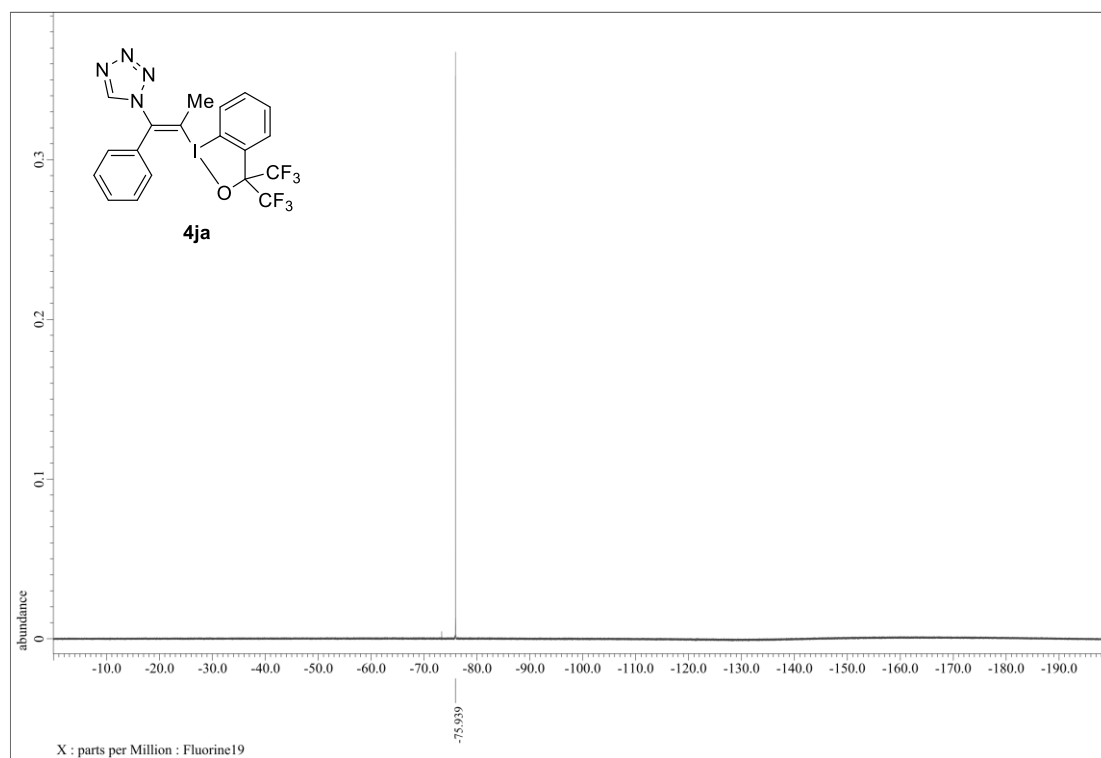

$^1\text{H}$  NMR (600 MHz,  $\text{CDCl}_3$ ) and  $^{13}\text{C}\{^1\text{H}\}$  NMR (151 MHz,  $\text{CDCl}_3$ ) spectra of **4ja'**

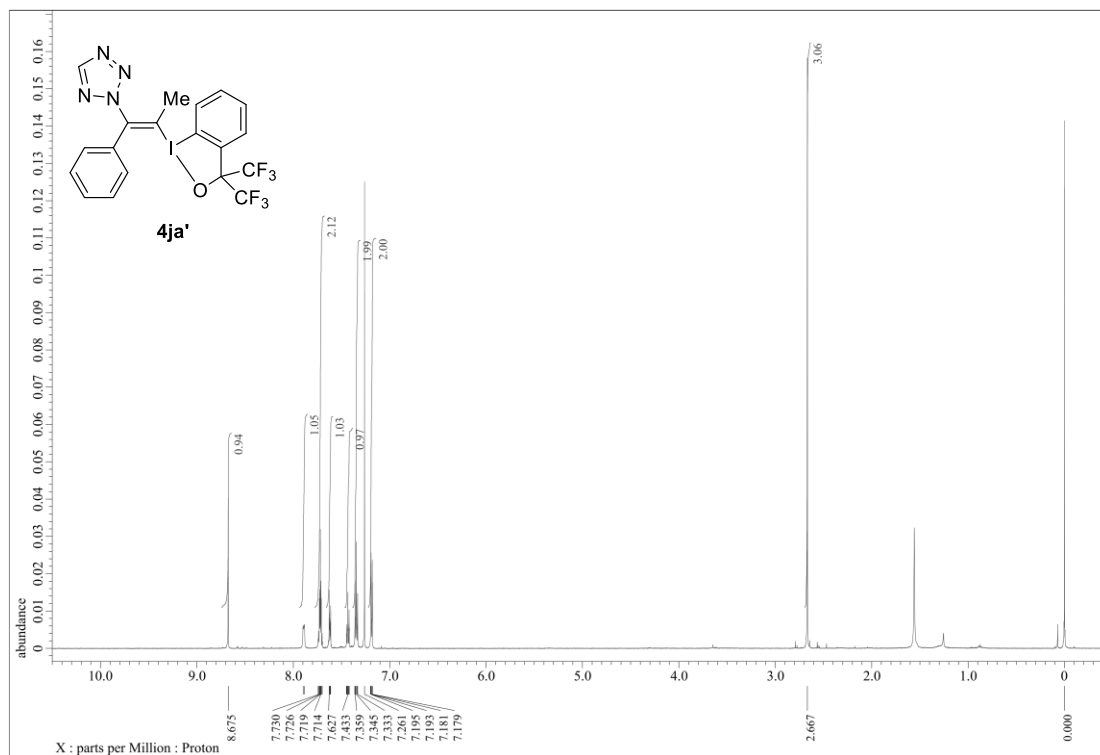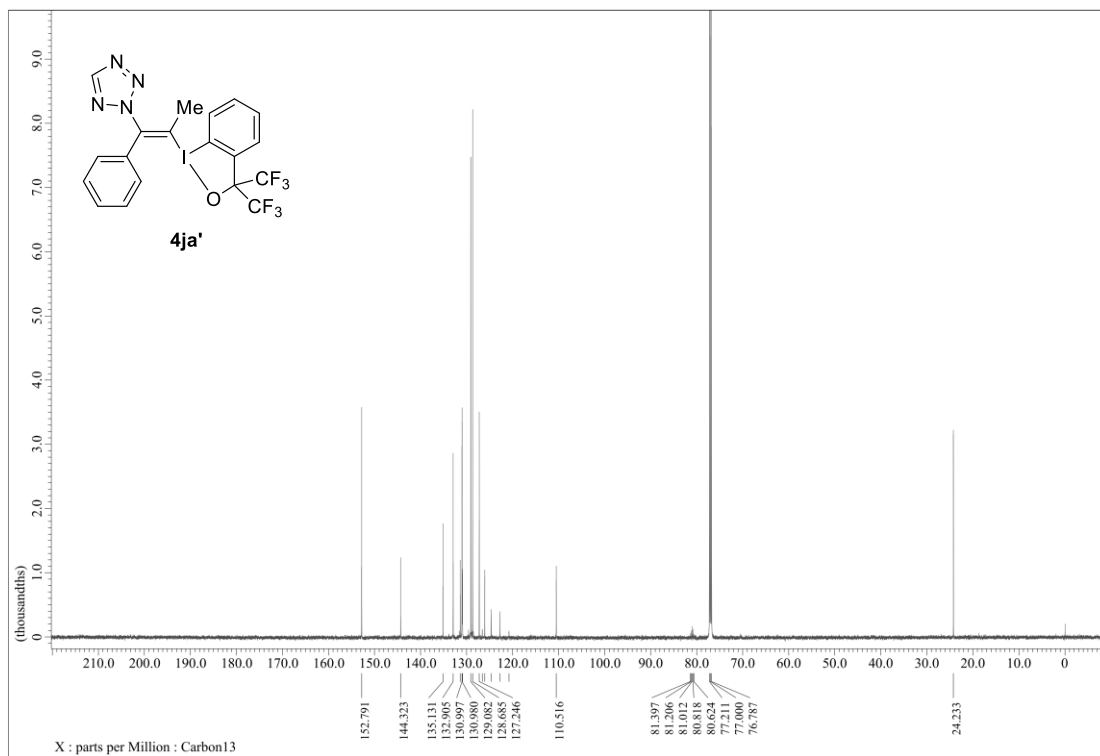

$^{19}\text{F}\{^1\text{H}\}$  NMR (565 MHz,  $\text{CDCl}_3$ ) spectrum of **4ja'**

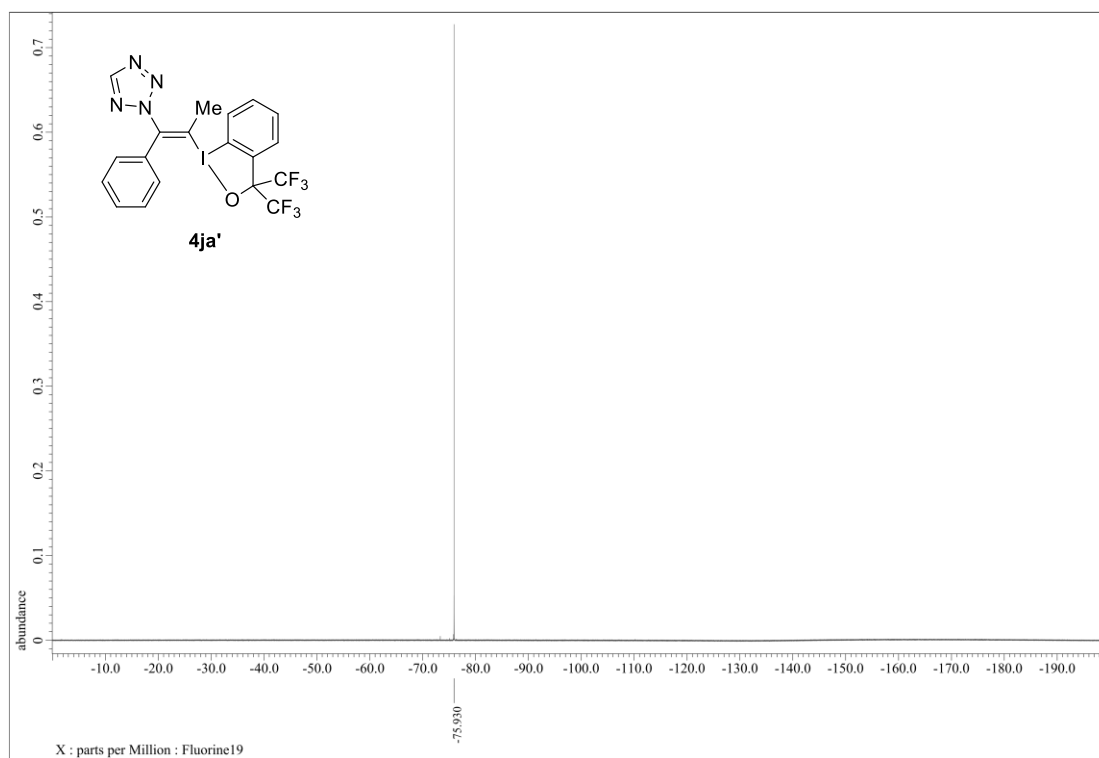

$^1\text{H}$  NMR (600 MHz,  $\text{CDCl}_3$ ) and  $^{13}\text{C}\{^1\text{H}\}$  NMR (151 MHz,  $\text{CDCl}_3$ ) spectra of **4ka**

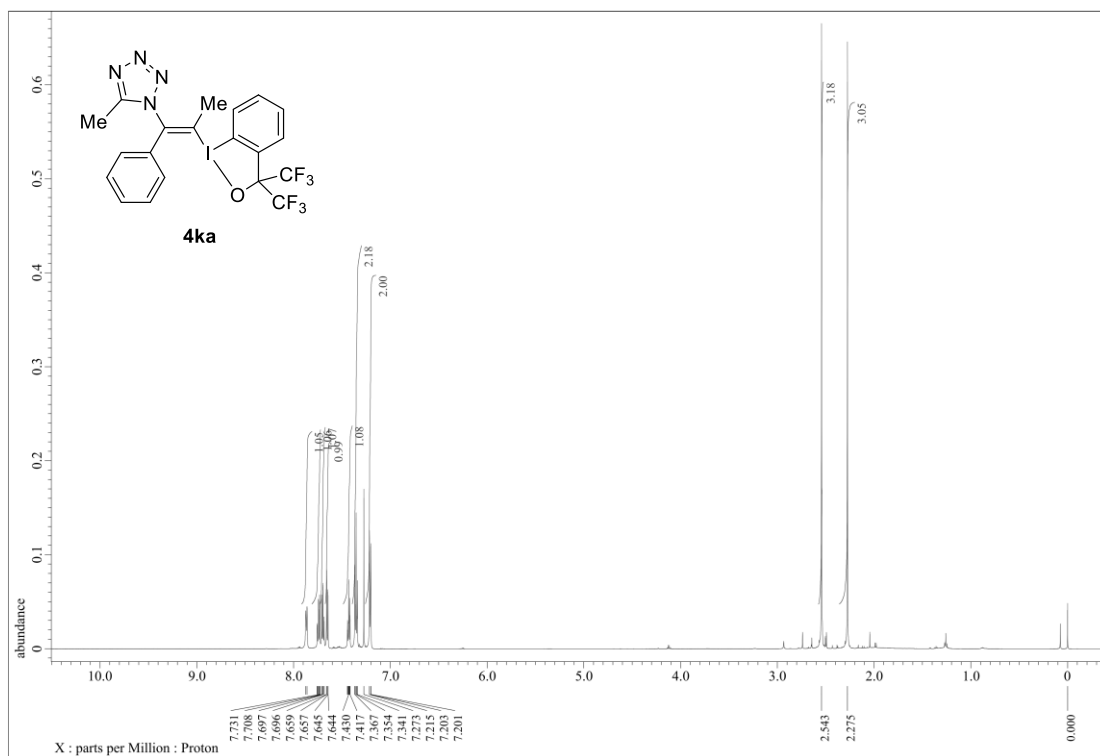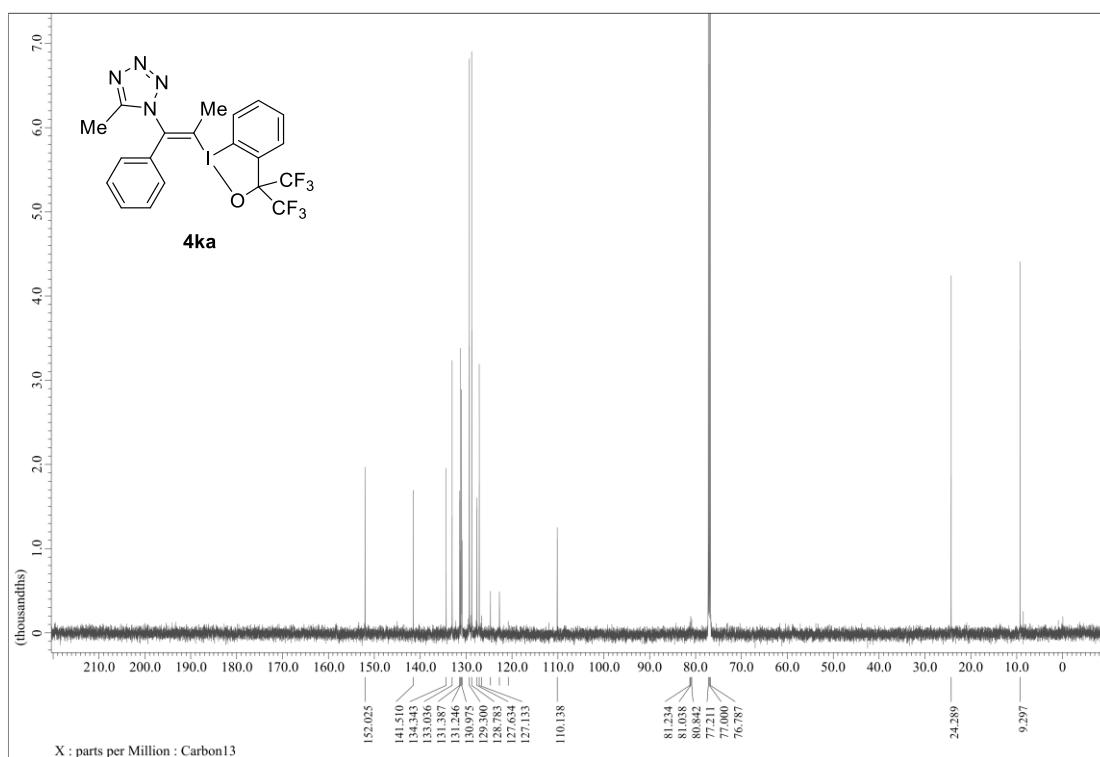

$^{19}\text{F}\{^1\text{H}\}$  NMR (565 MHz,  $\text{CDCl}_3$ ) spectrum of **4ka**

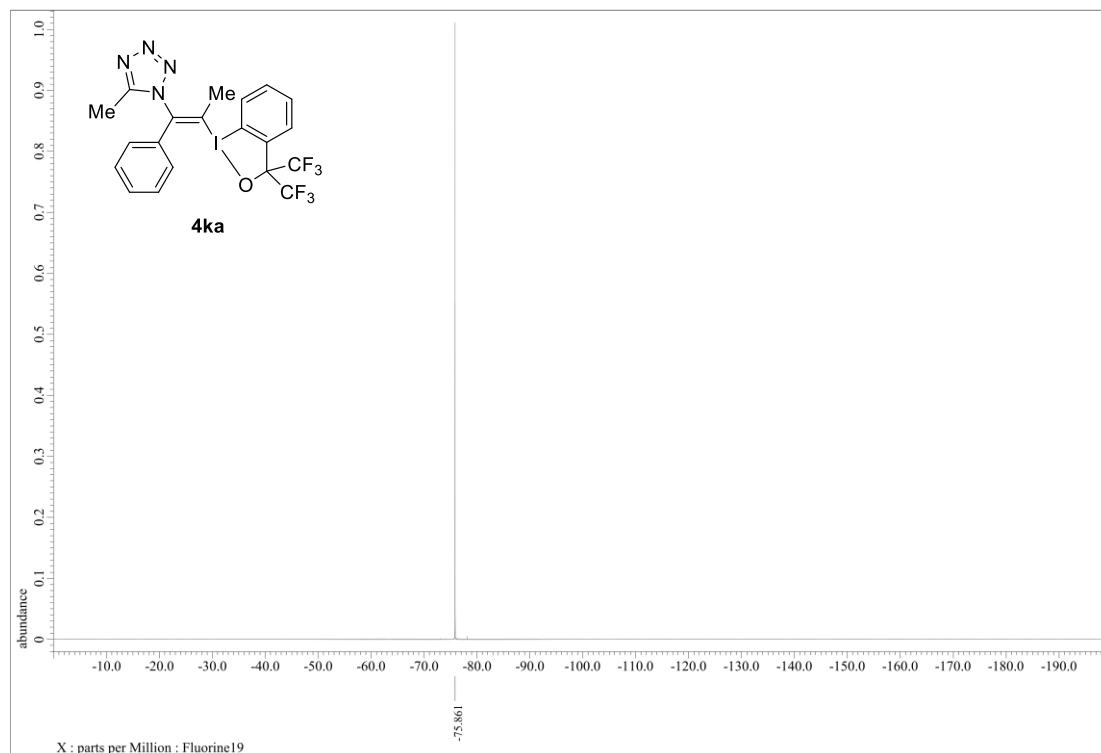

$^1\text{H}$  NMR (600 MHz,  $\text{CDCl}_3$ ) and  $^{13}\text{C}\{^1\text{H}\}$  NMR (151 MHz,  $\text{CDCl}_3$ ) spectra of **4ka'**

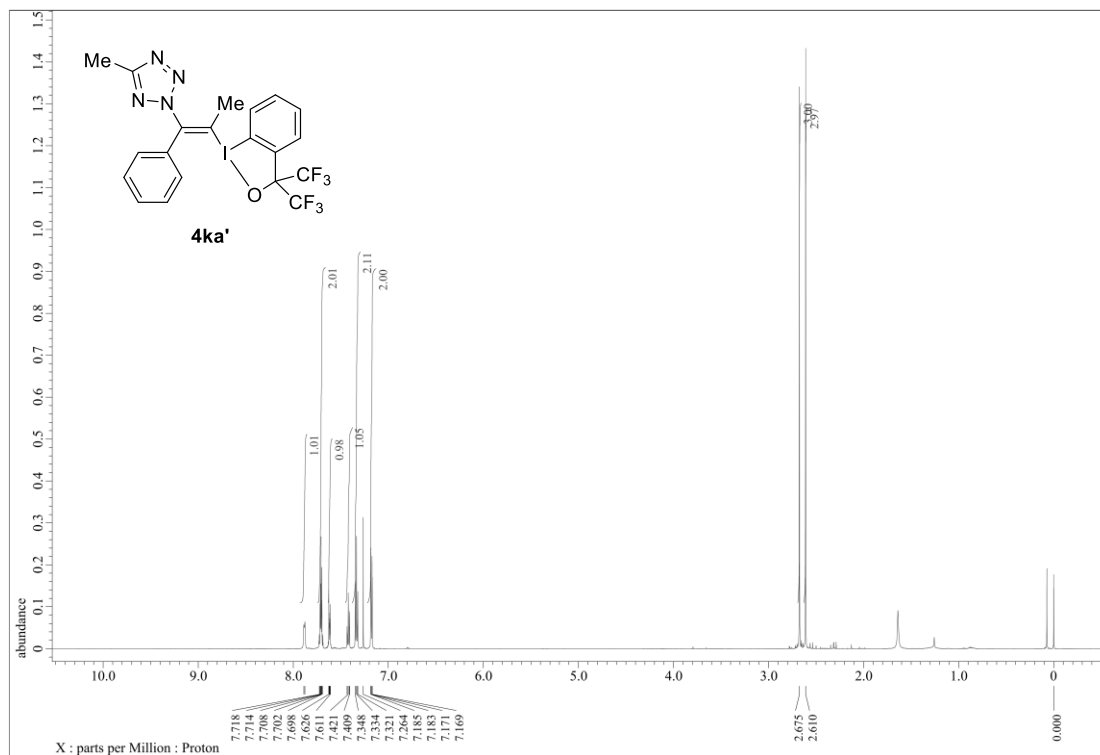

$^{19}\text{F}\{^1\text{H}\}$  NMR (565 MHz,  $\text{CDCl}_3$ ) spectrum of **4ka'**

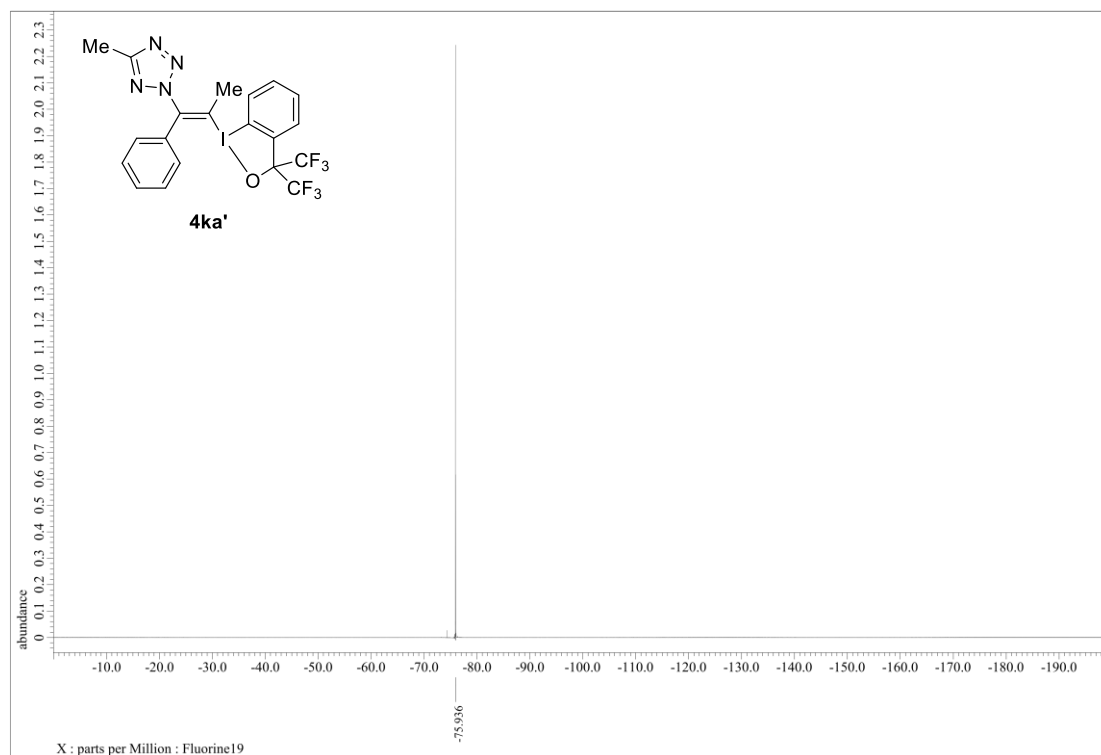

$^1\text{H}$  NMR (600 MHz,  $\text{CDCl}_3$ ) and  $^{13}\text{C}\{^1\text{H}\}$  NMR (151 MHz,  $\text{CDCl}_3$ ) spectra of **4ab**

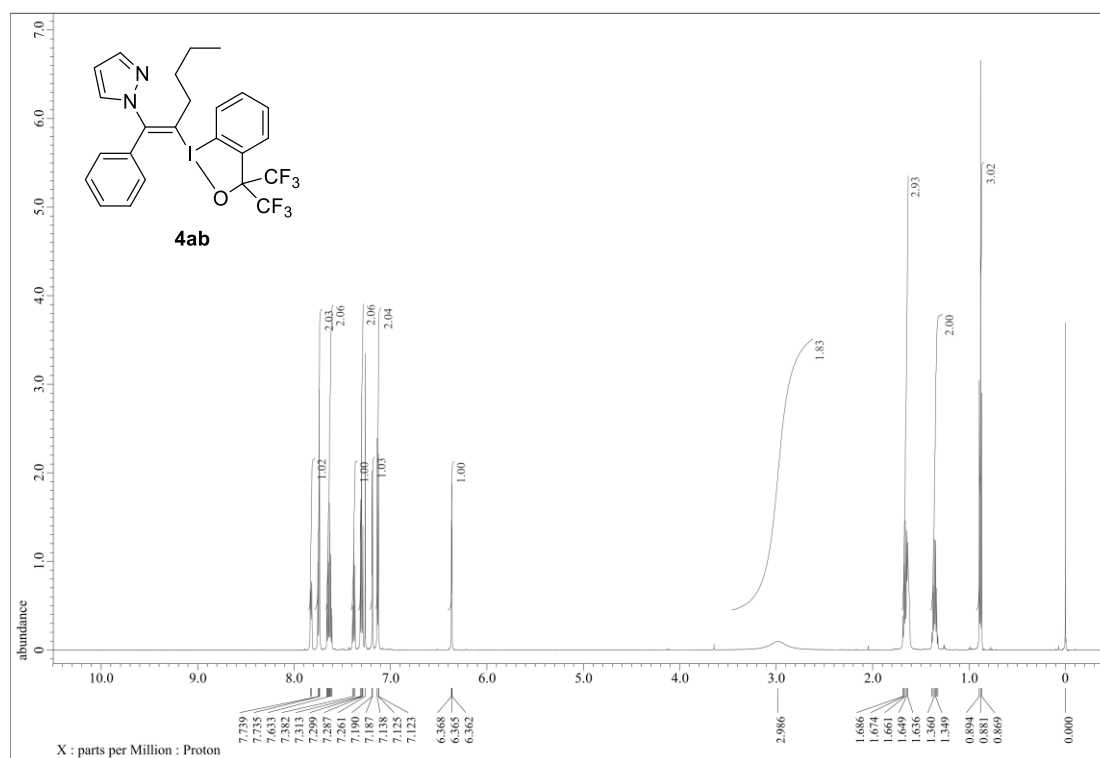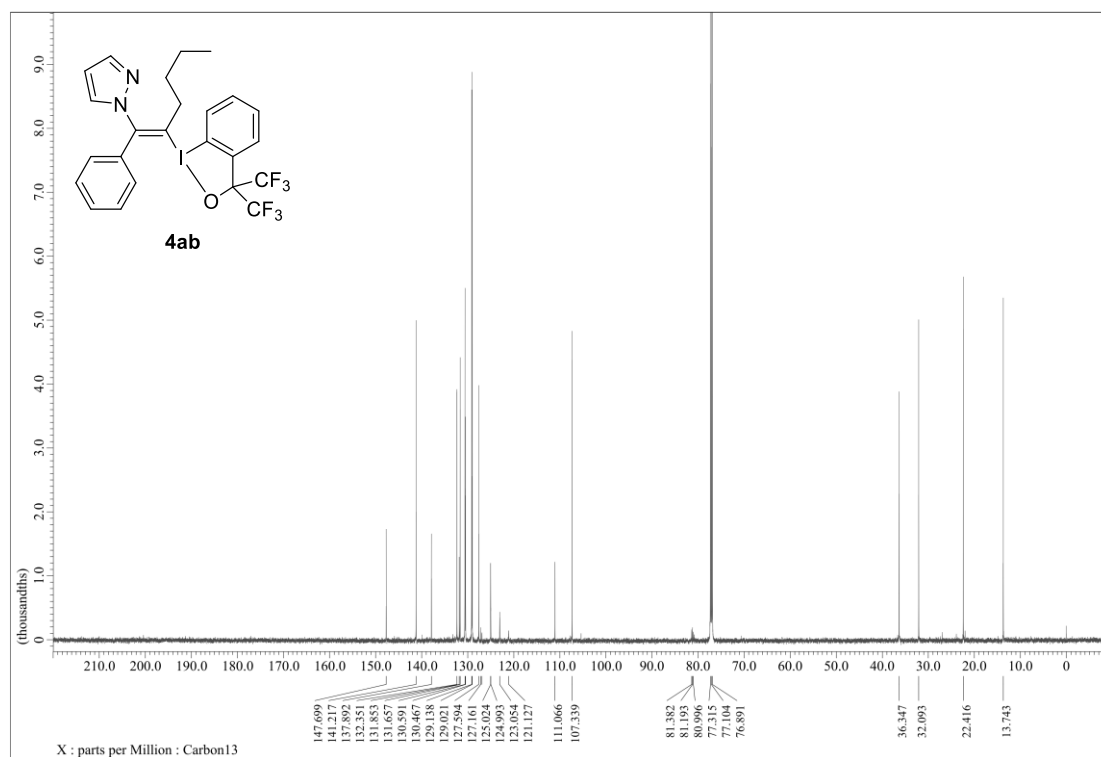

$^{19}\text{F}\{^1\text{H}\}$  NMR (565 MHz,  $\text{CDCl}_3$ ) spectrum of **4ab**

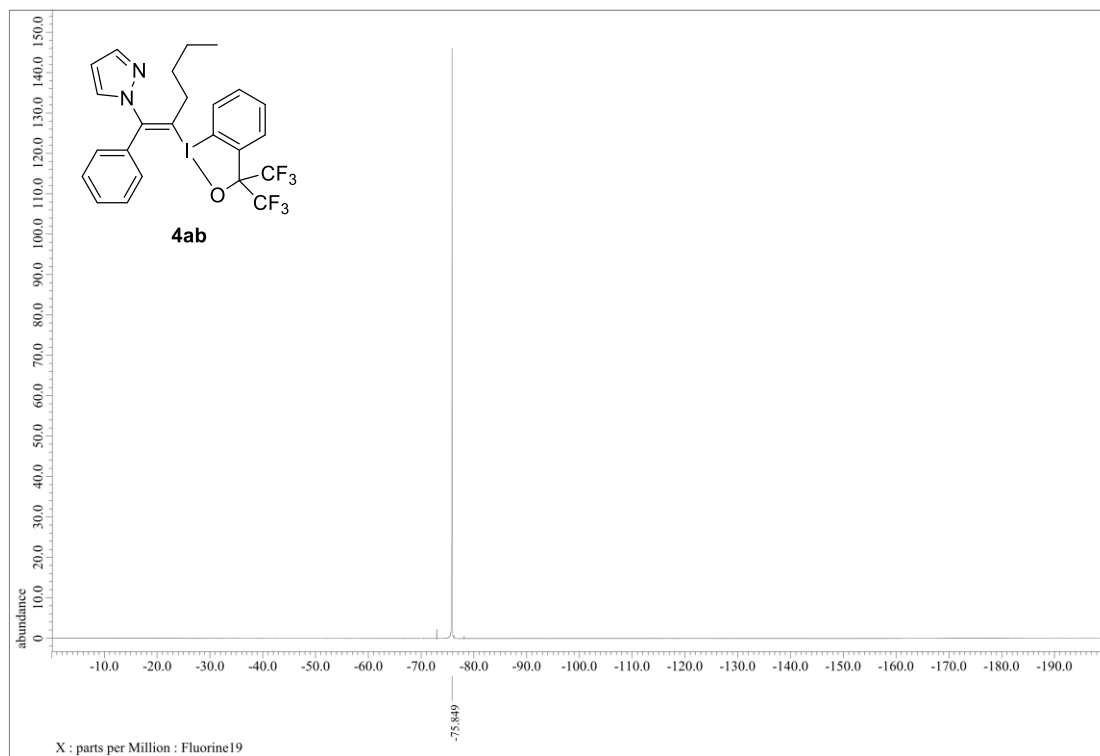

$^1\text{H}$  NMR (600 MHz,  $\text{CDCl}_3$ ) and  $^{13}\text{C}\{^1\text{H}\}$  NMR (151 MHz,  $\text{CDCl}_3$ ) spectra of **4ac**

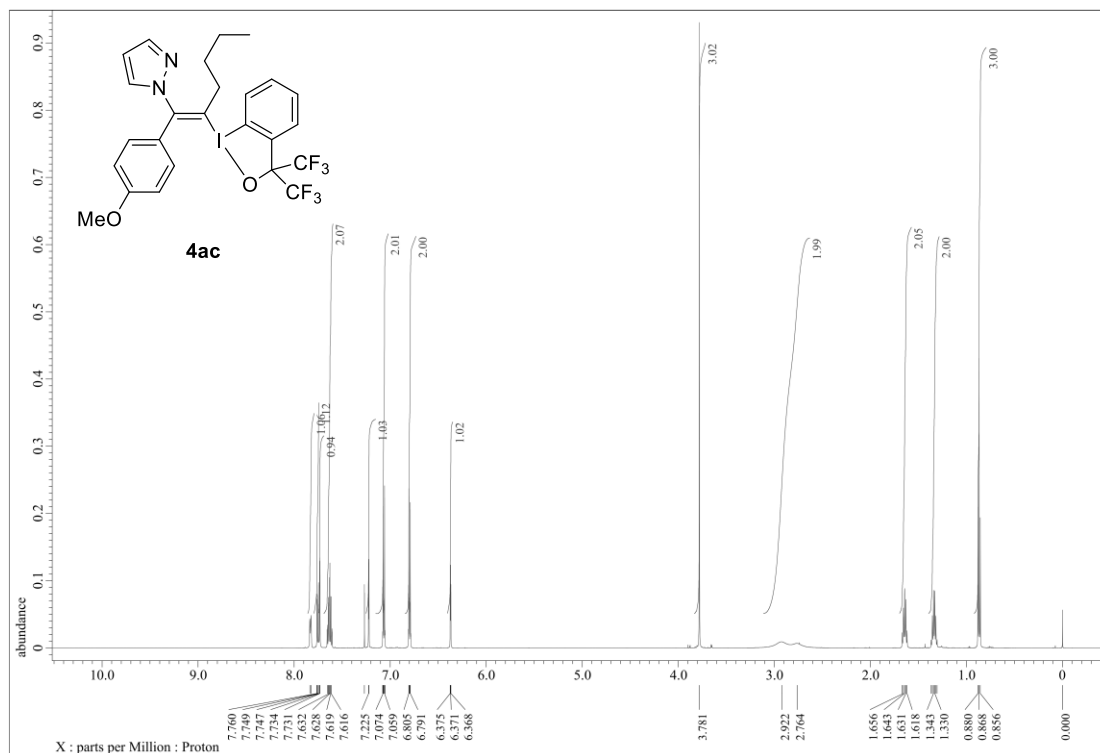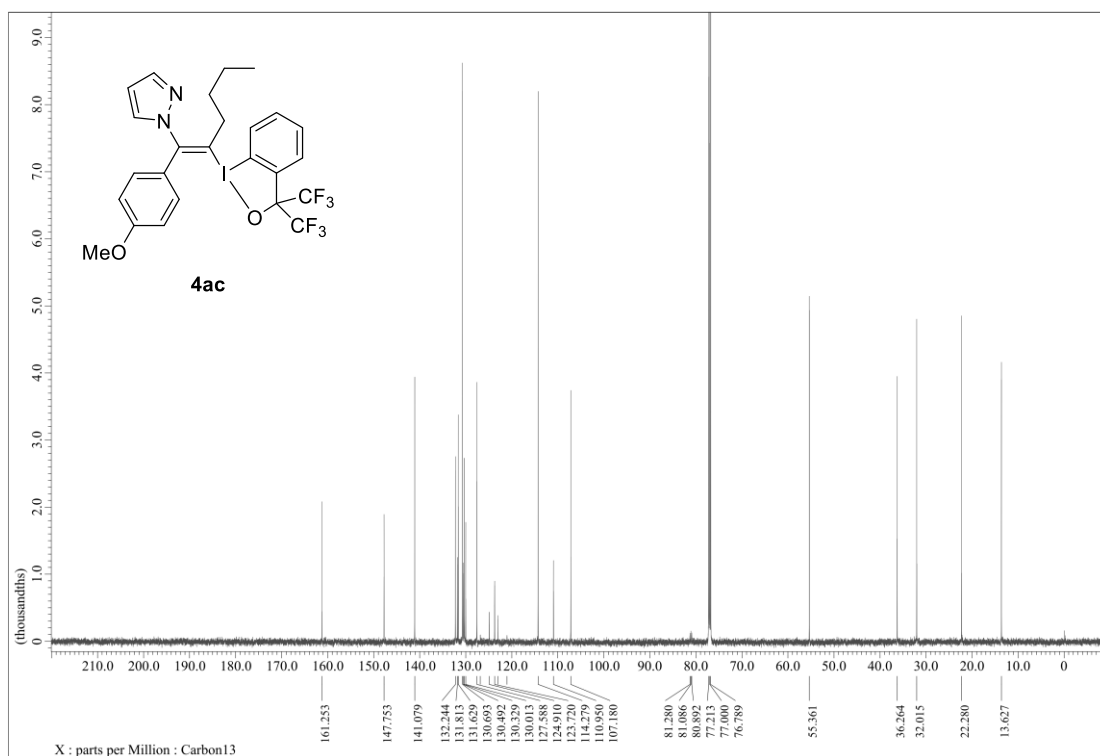

$^{19}\text{F}\{^1\text{H}\}$  NMR (565 MHz,  $\text{CDCl}_3$ ) spectrum of **4ac**

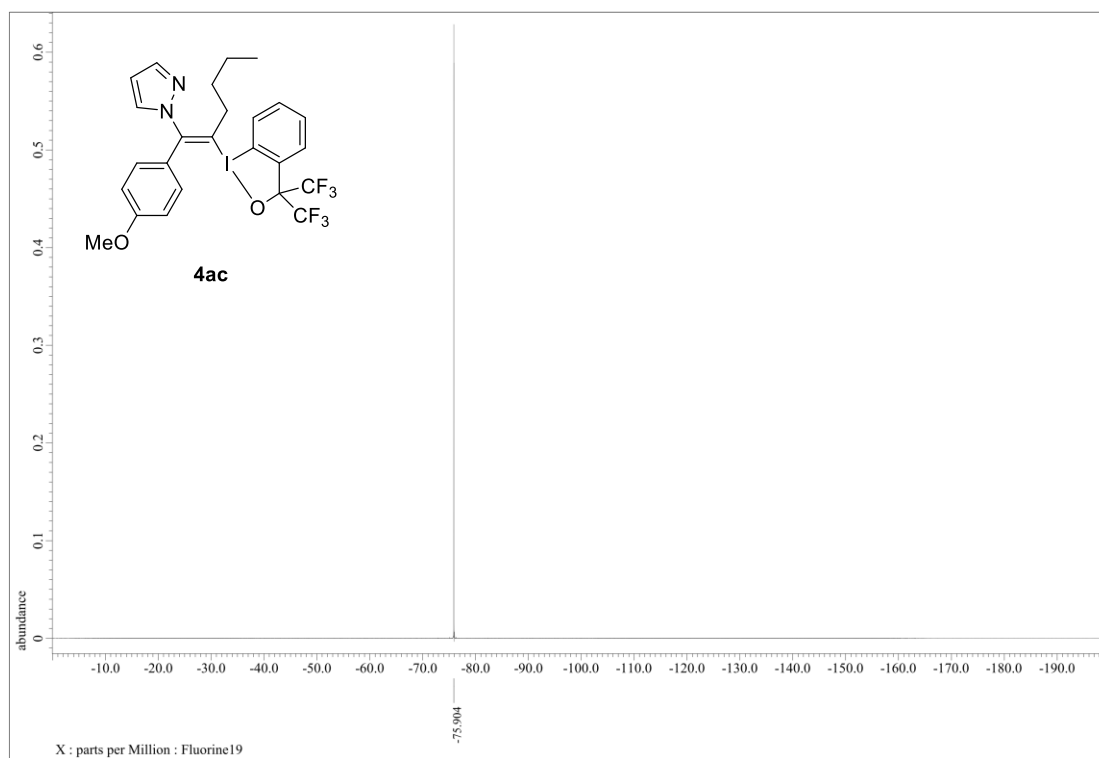

$^1\text{H}$  NMR (600 MHz,  $\text{CDCl}_3$ ) and  $^{13}\text{C}\{^1\text{H}\}$  NMR (151 MHz,  $\text{CDCl}_3$ ) spectra of **4ad**

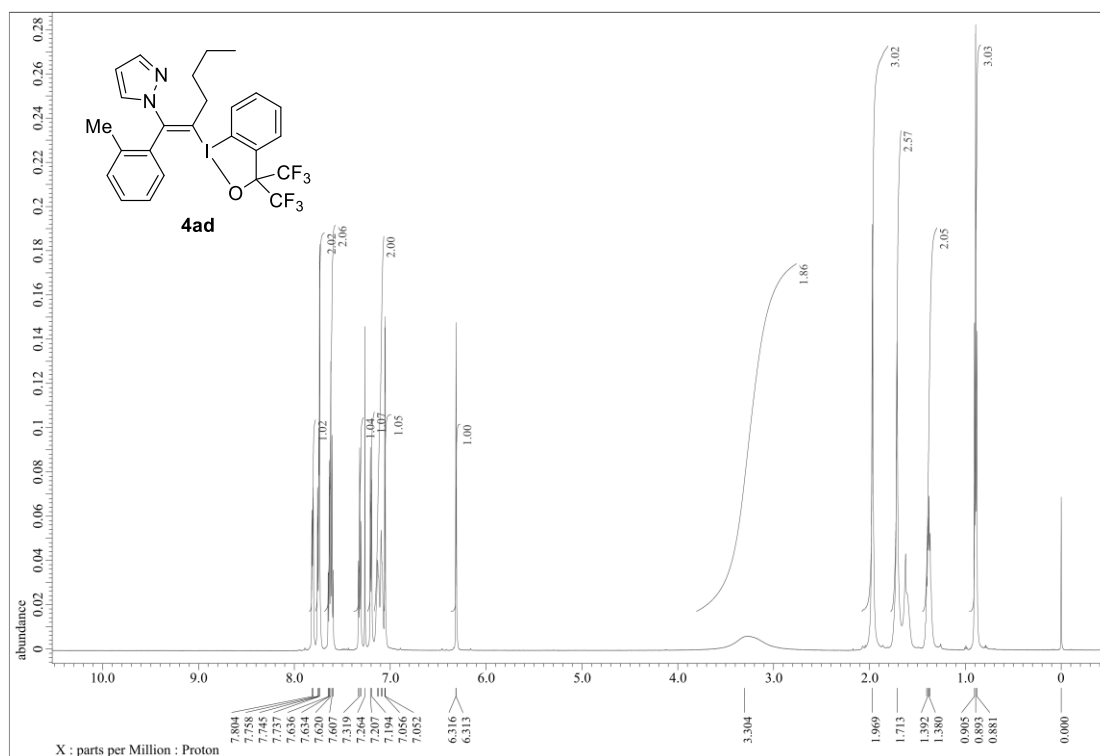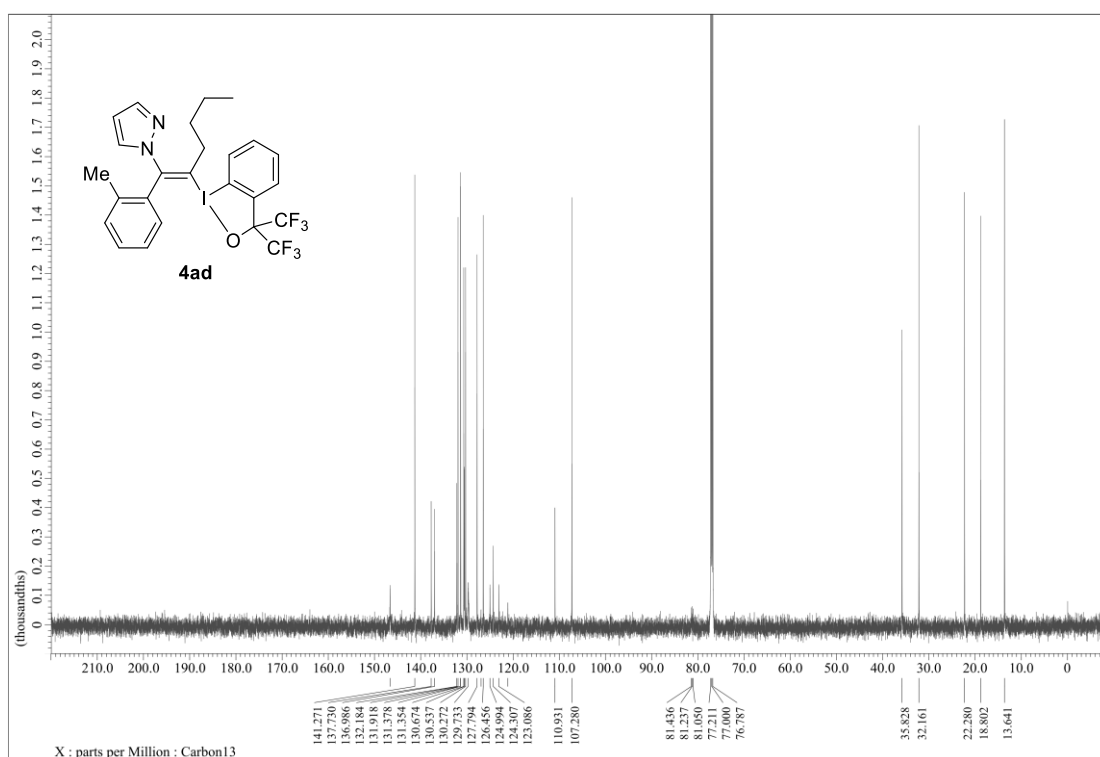

$^{19}\text{F}\{^1\text{H}\}$  NMR (565 MHz,  $\text{CDCl}_3$ ) spectrum of **4ad**

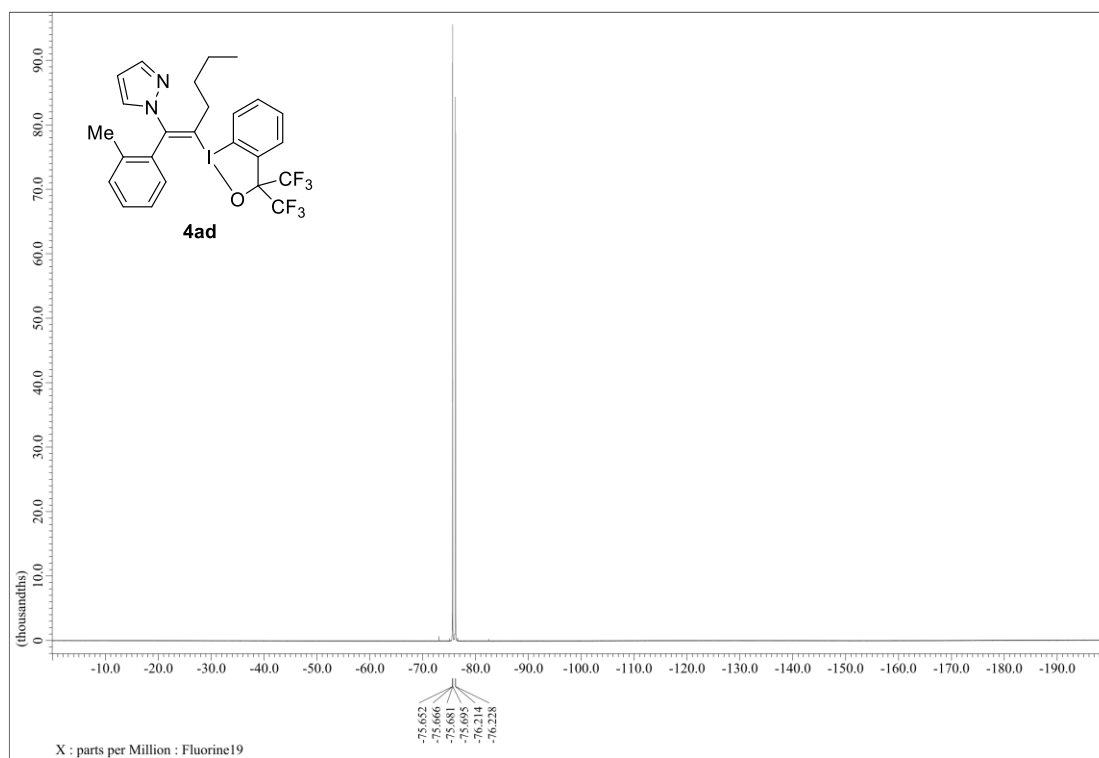

$^1\text{H}$  NMR (600 MHz,  $\text{CDCl}_3$ ) and  $^{13}\text{C}\{^1\text{H}\}$  NMR (151 MHz,  $\text{CDCl}_3$ ) spectra of **4ae**

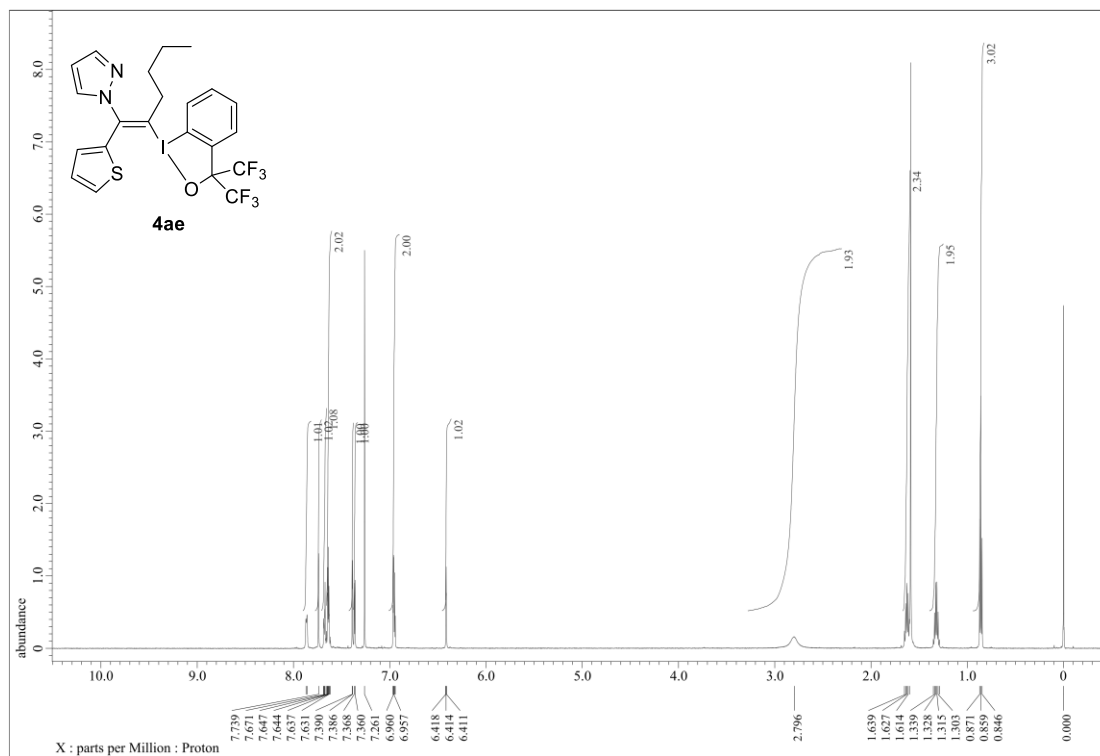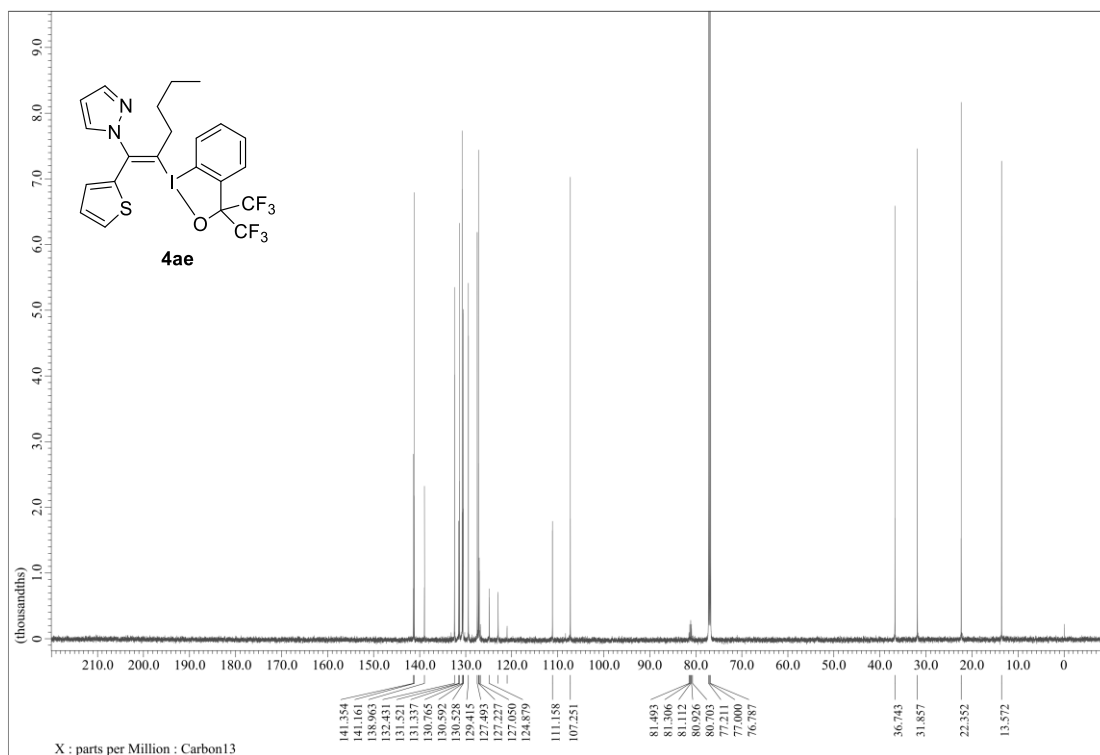

$^{19}\text{F}\{^1\text{H}\}$  NMR (565 MHz,  $\text{CDCl}_3$ ) spectrum of **4ae**

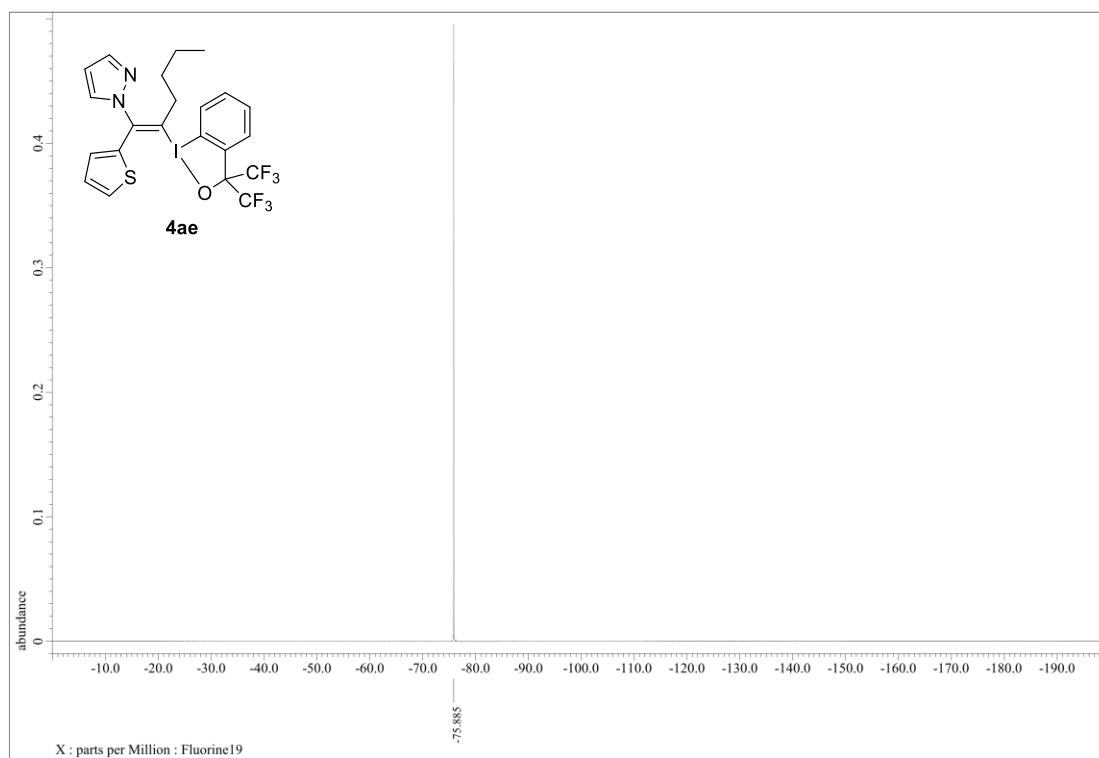

$^1\text{H}$  NMR (600 MHz,  $\text{CDCl}_3$ ) and  $^{13}\text{C}\{^1\text{H}\}$  NMR (151 MHz,  $\text{CDCl}_3$ ) spectra of **4af**

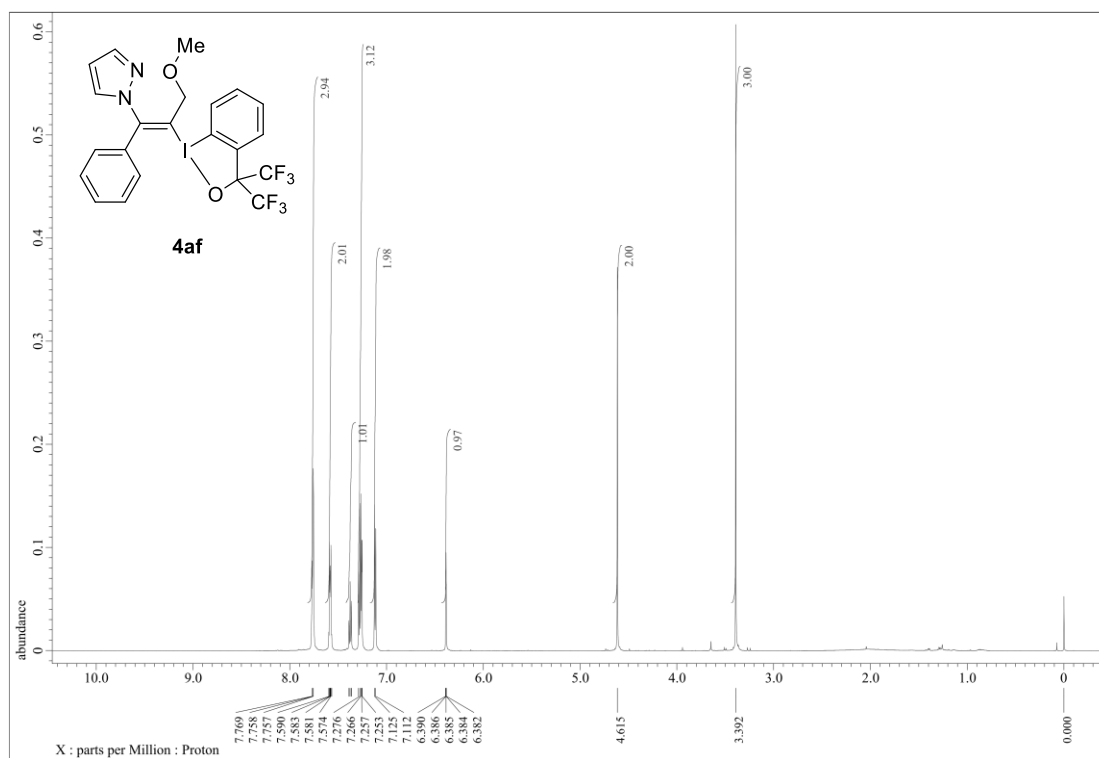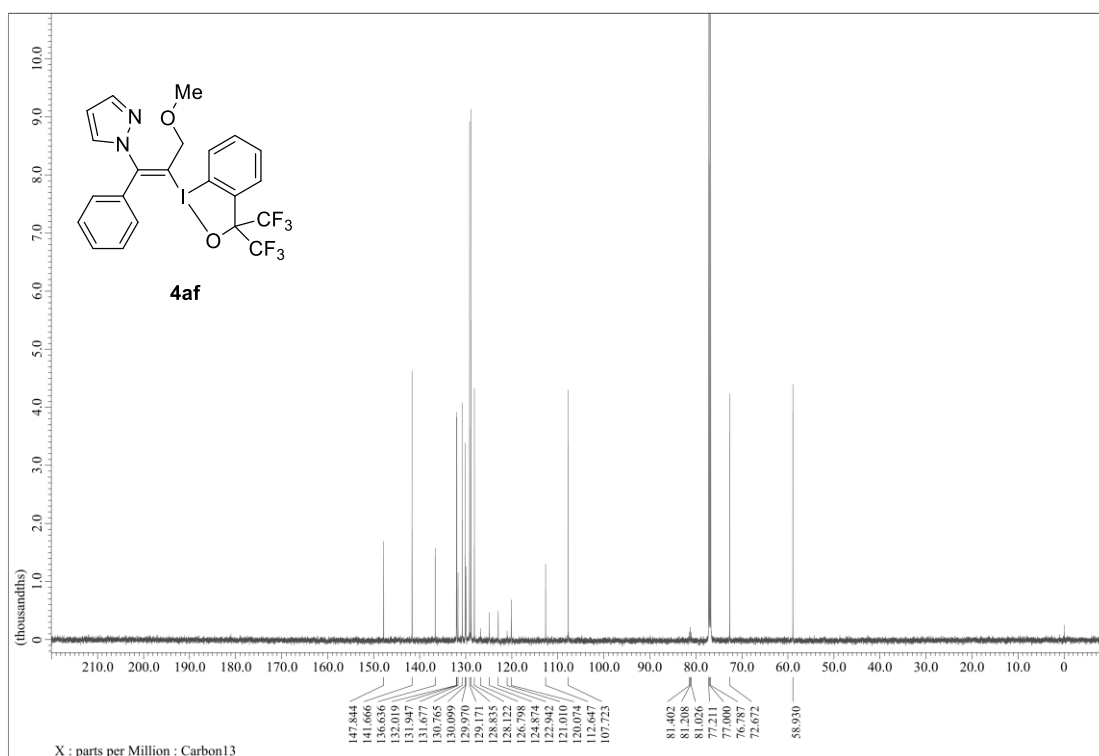

$^{19}\text{F}\{^1\text{H}\}$  NMR (565 MHz,  $\text{CDCl}_3$ ) spectrum of **4af**

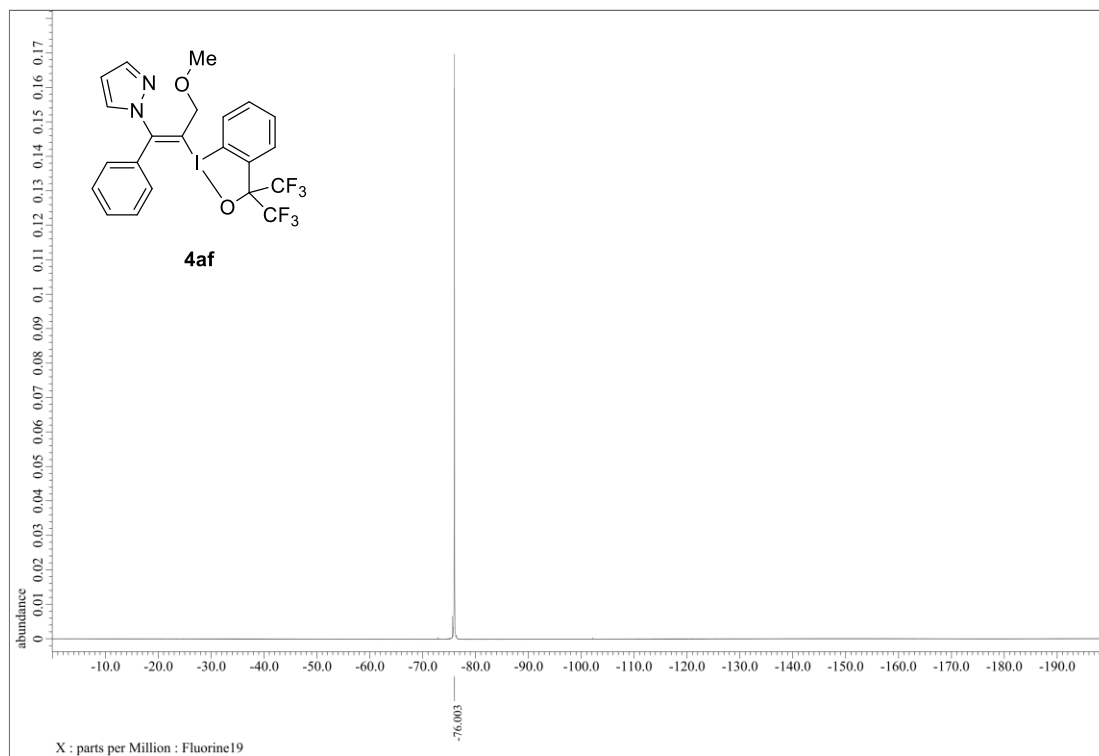

$^1\text{H}$  NMR (600 MHz,  $\text{CDCl}_3$ ) and  $^{13}\text{C}\{^1\text{H}\}$  NMR (151 MHz,  $\text{CDCl}_3$ ) spectra of **4ag**

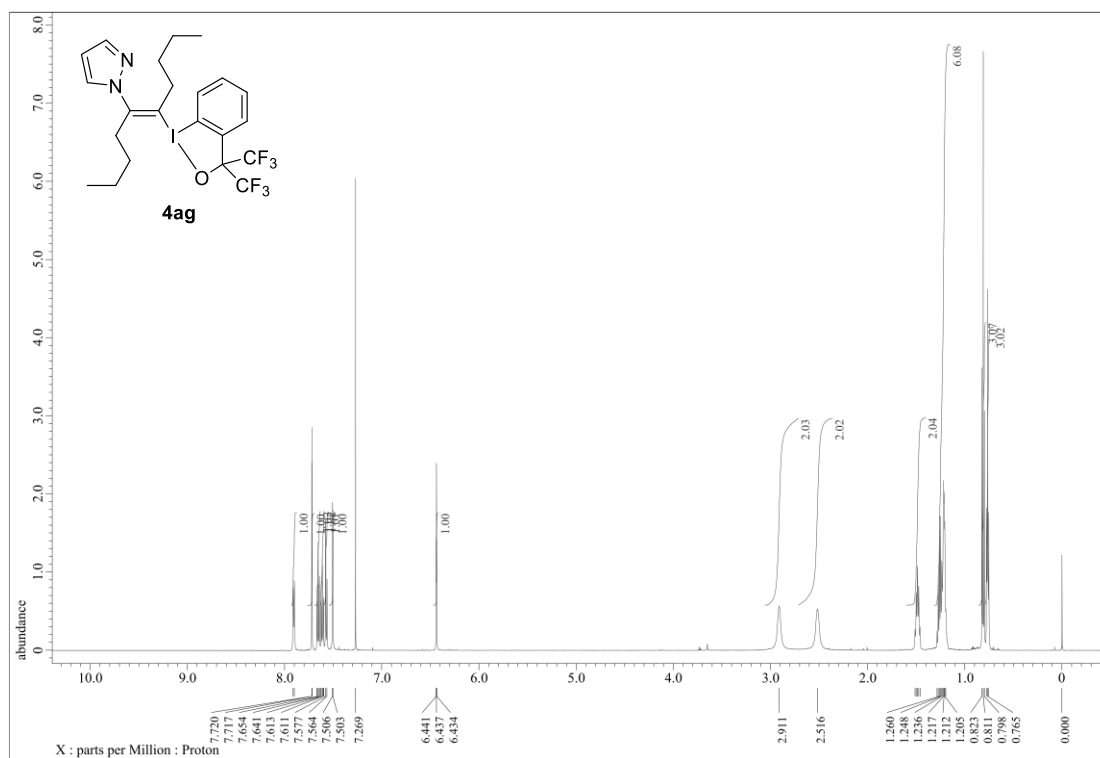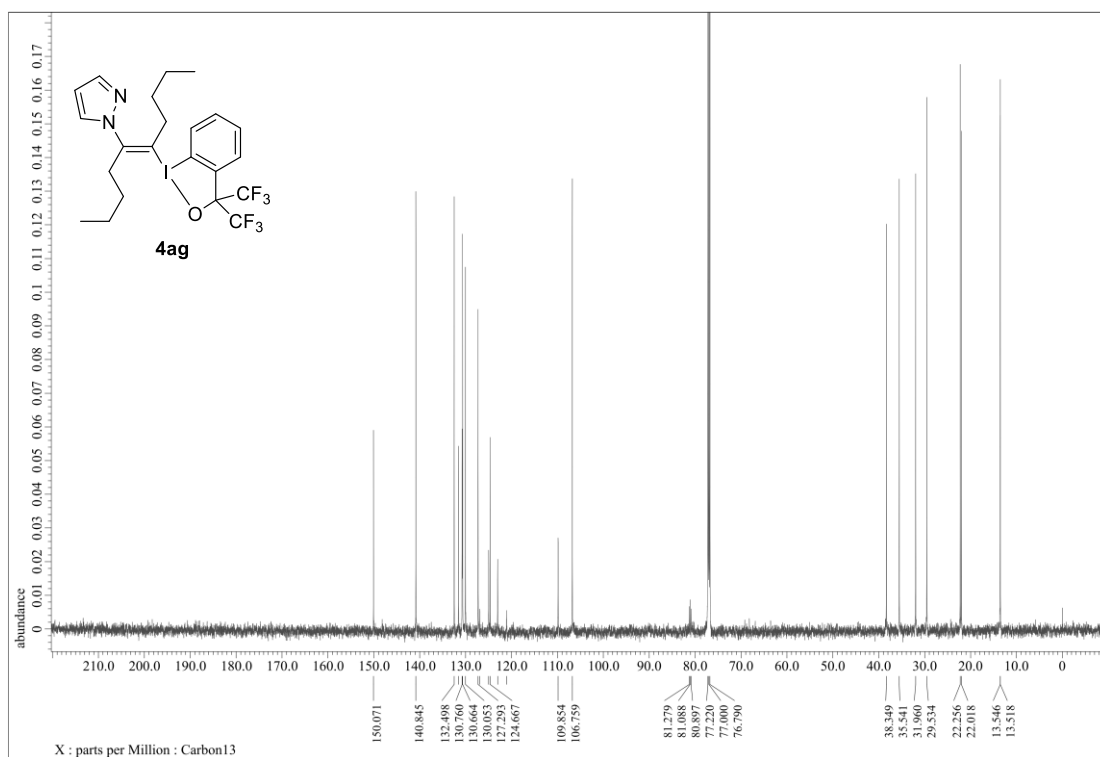

$^{19}\text{F}\{^1\text{H}\}$  NMR (565 MHz,  $\text{CDCl}_3$ ) spectrum of **4ag**

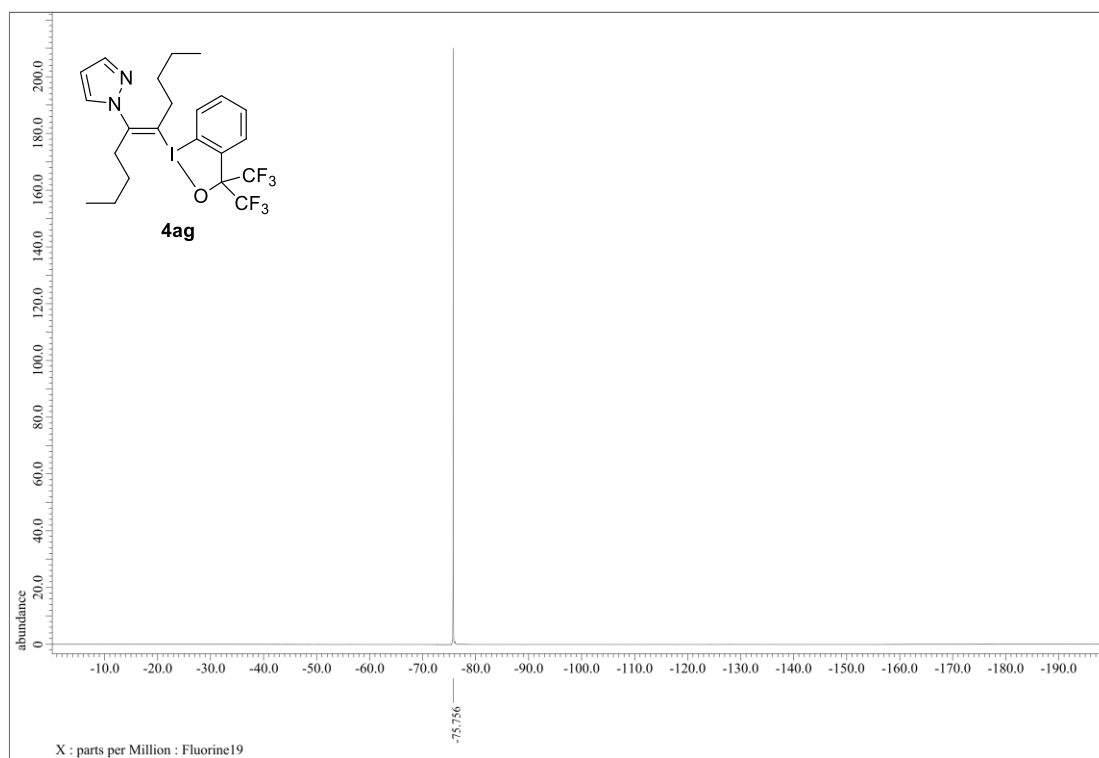

$^1\text{H}$  NMR (600 MHz,  $\text{CDCl}_3$ ) and  $^{13}\text{C}\{^1\text{H}\}$  NMR (151 MHz,  $\text{CDCl}_3$ ) spectra of **4ah**

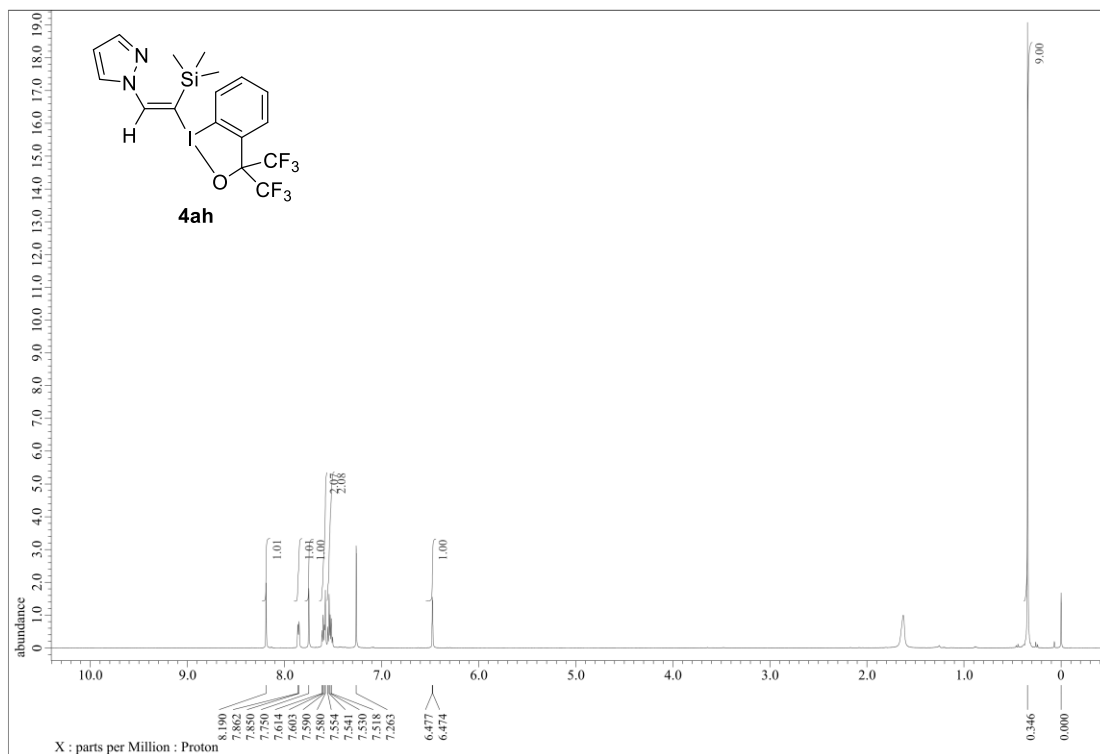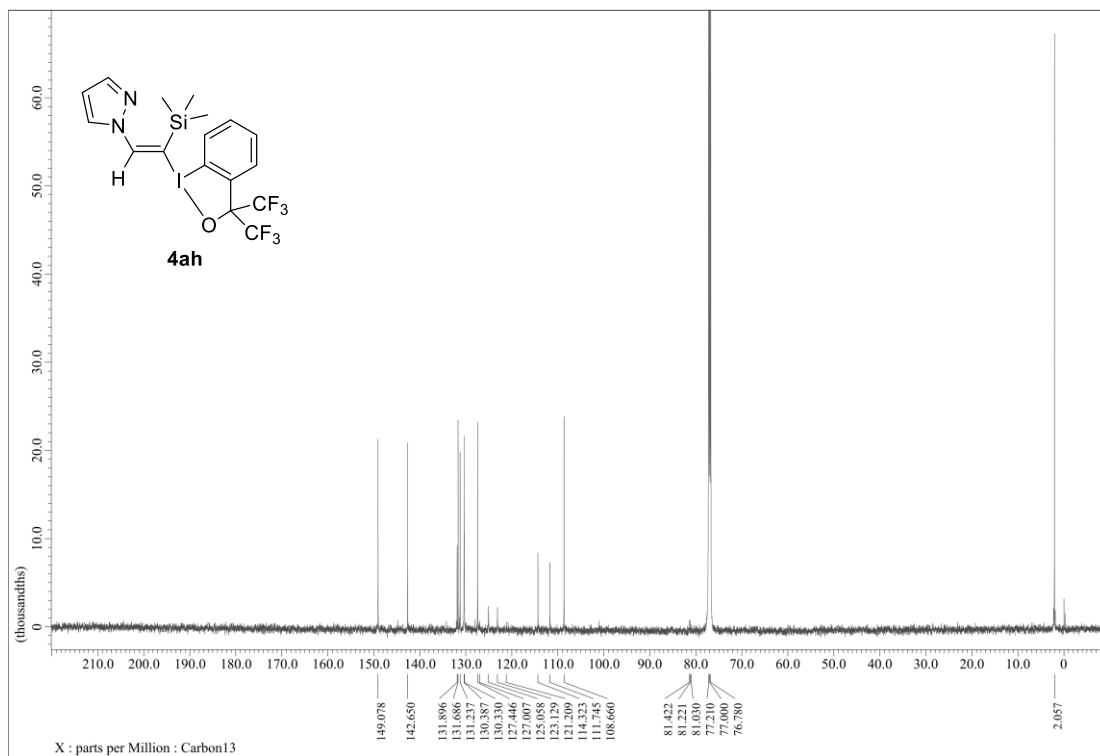

$^{19}\text{F}\{^1\text{H}\}$  NMR (565 MHz,  $\text{CDCl}_3$ ) spectrum of **4ah**

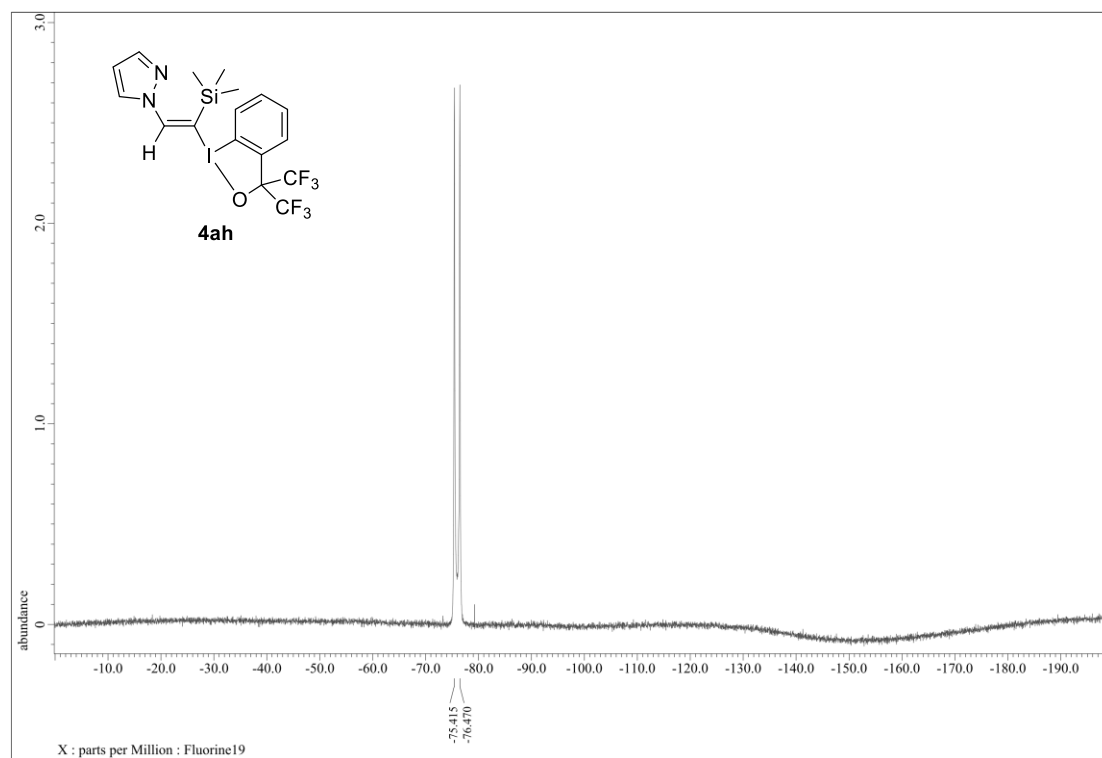

$^1\text{H}$  NMR (600 MHz,  $\text{CDCl}_3$ ) and  $^{13}\text{C}\{^1\text{H}\}$  NMR (151 MHz,  $\text{CDCl}_3$ ) spectra of **4ai**

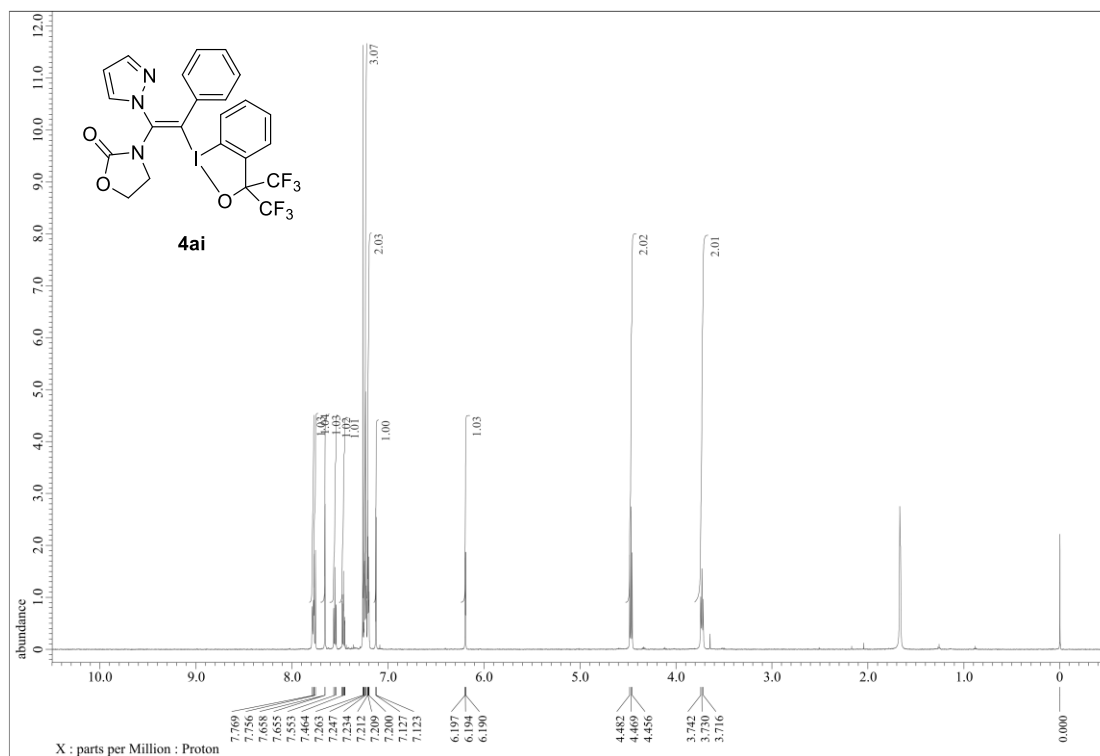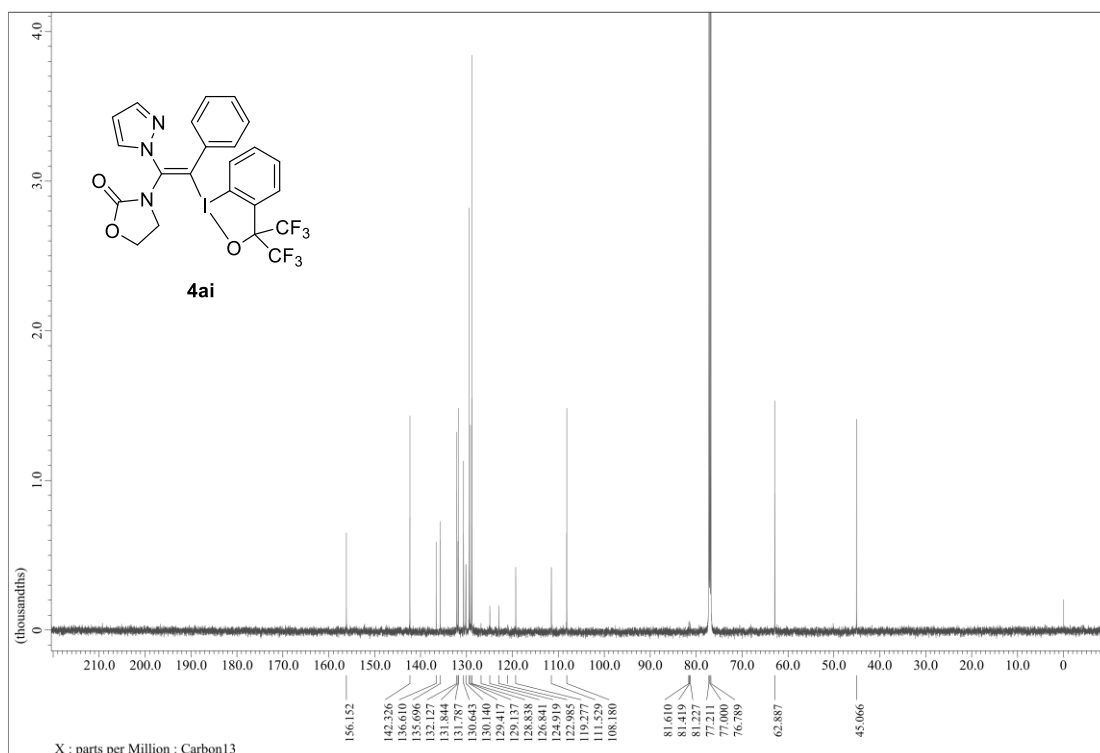

$^{19}\text{F}\{^1\text{H}\}$  NMR (565 MHz,  $\text{CDCl}_3$ ) spectrum of **4ai**

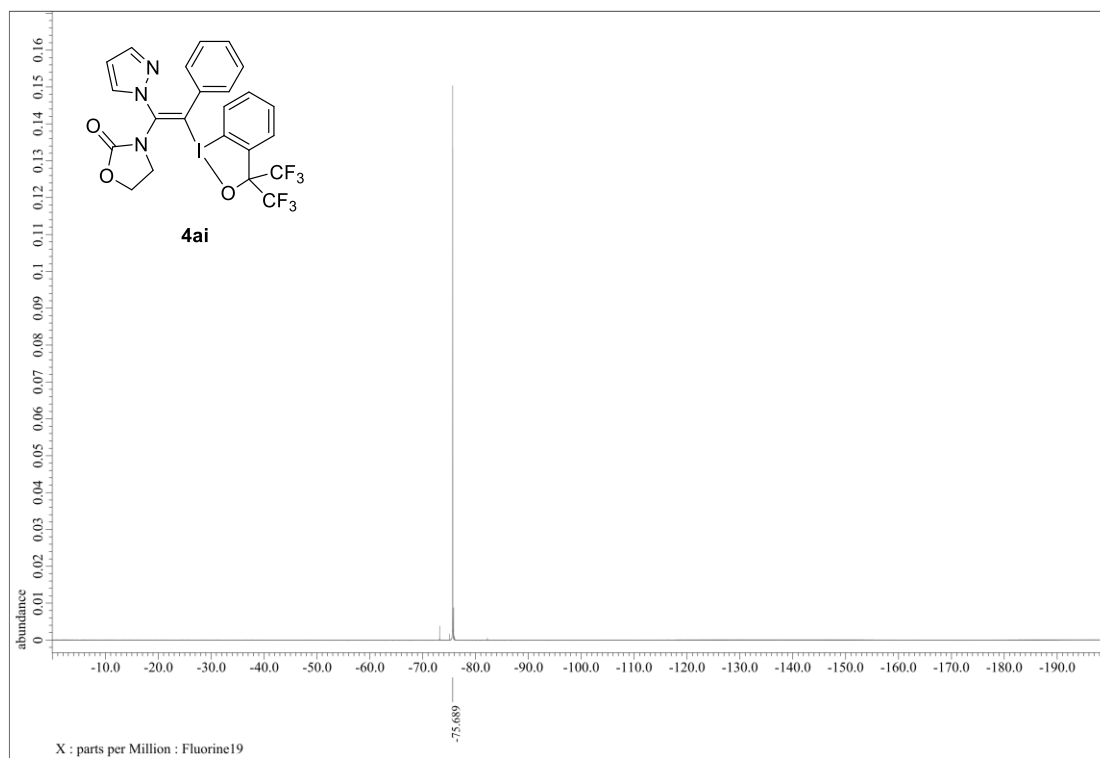

$^1\text{H}$  NMR (600 MHz,  $\text{CDCl}_3$ ) and  $^{13}\text{C}\{^1\text{H}\}$  NMR (151 MHz,  $\text{CDCl}_3$ ) spectra of **5**

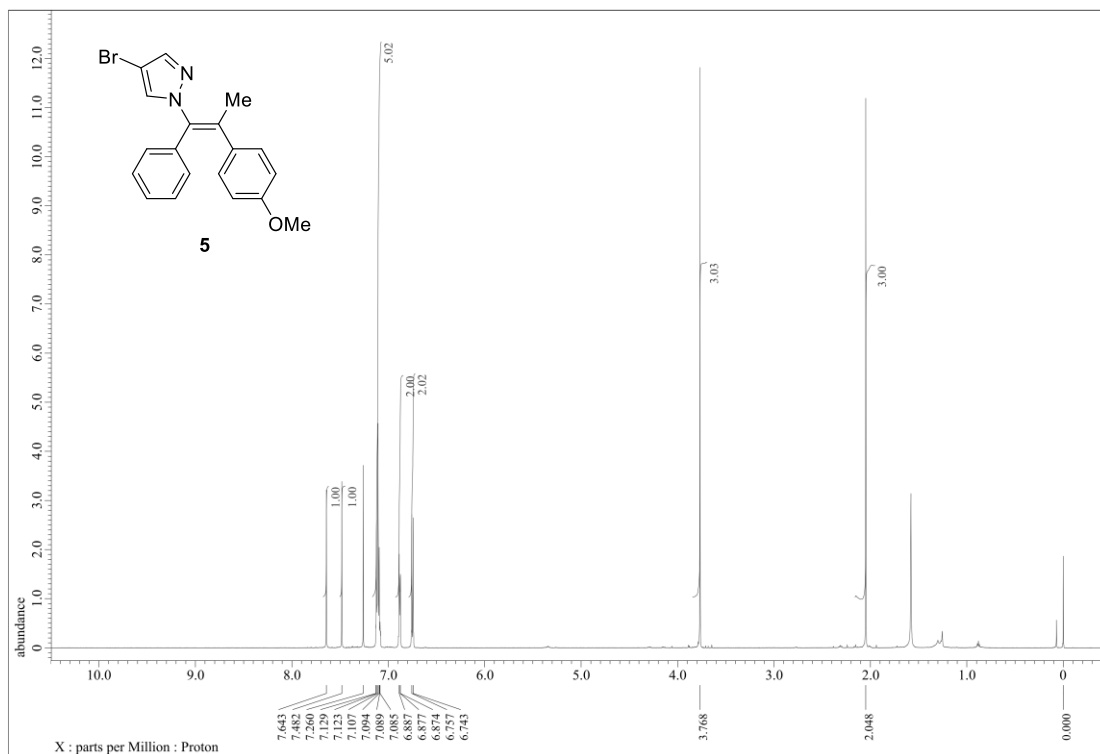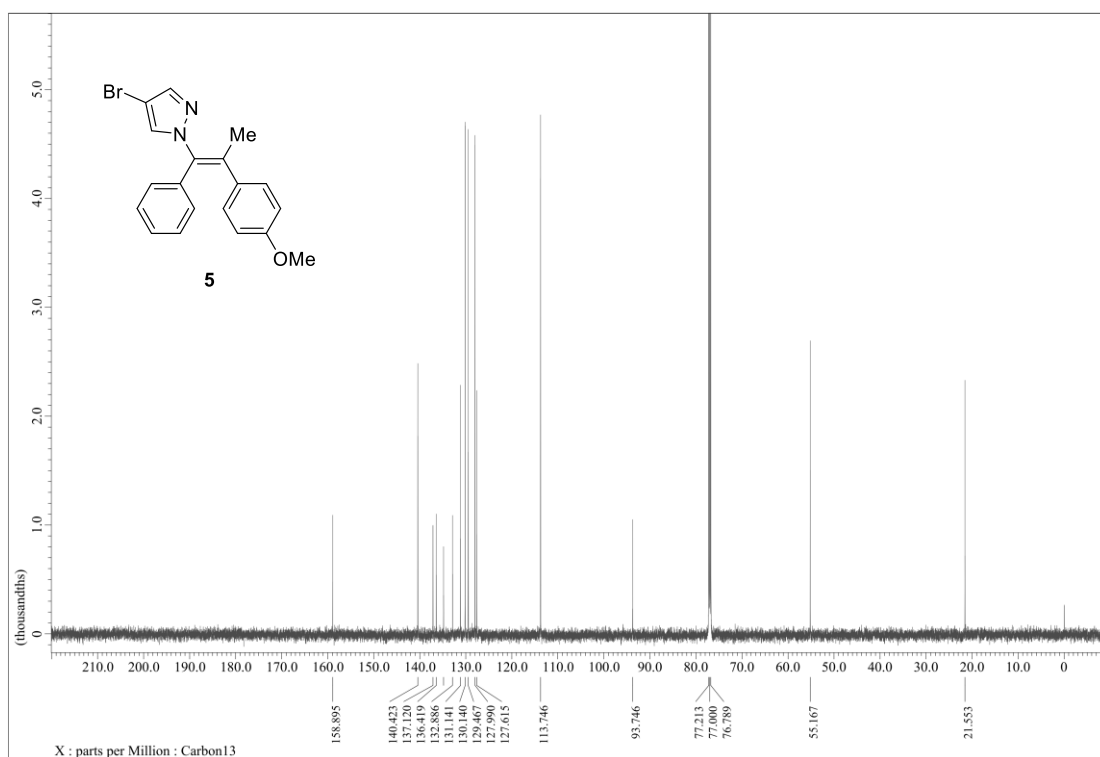

$^1\text{H}$  NMR (600 MHz,  $\text{CDCl}_3$ ) and  $^{13}\text{C}\{^1\text{H}\}$  NMR (151 MHz,  $\text{CDCl}_3$ ) spectra of **6**

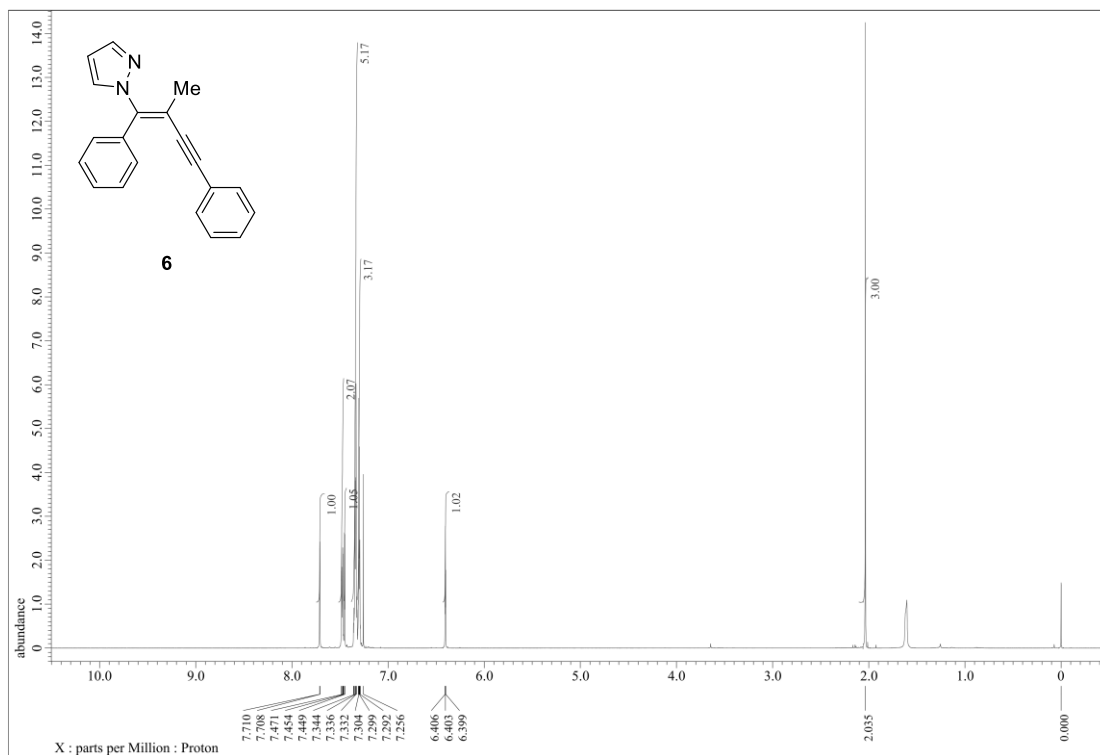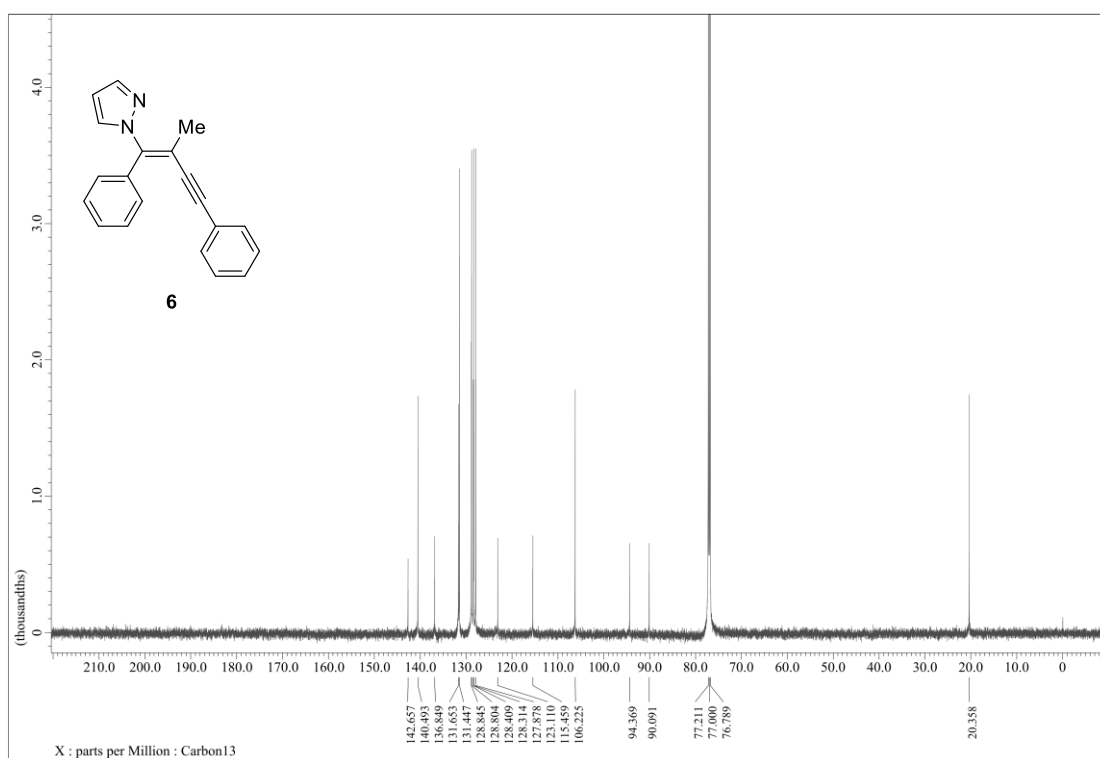

$^1\text{H}$  NMR (600 MHz,  $\text{CDCl}_3$ ) and  $^{13}\text{C}\{^1\text{H}\}$  NMR (151 MHz,  $\text{CDCl}_3$ ) spectra of **7**

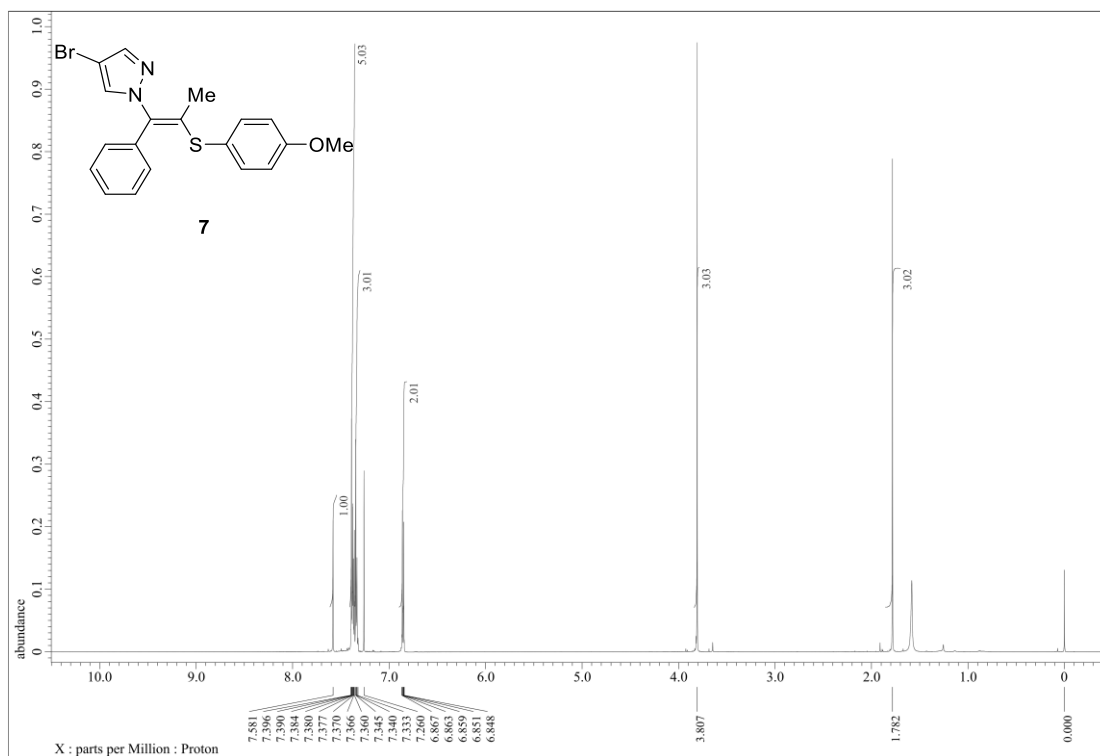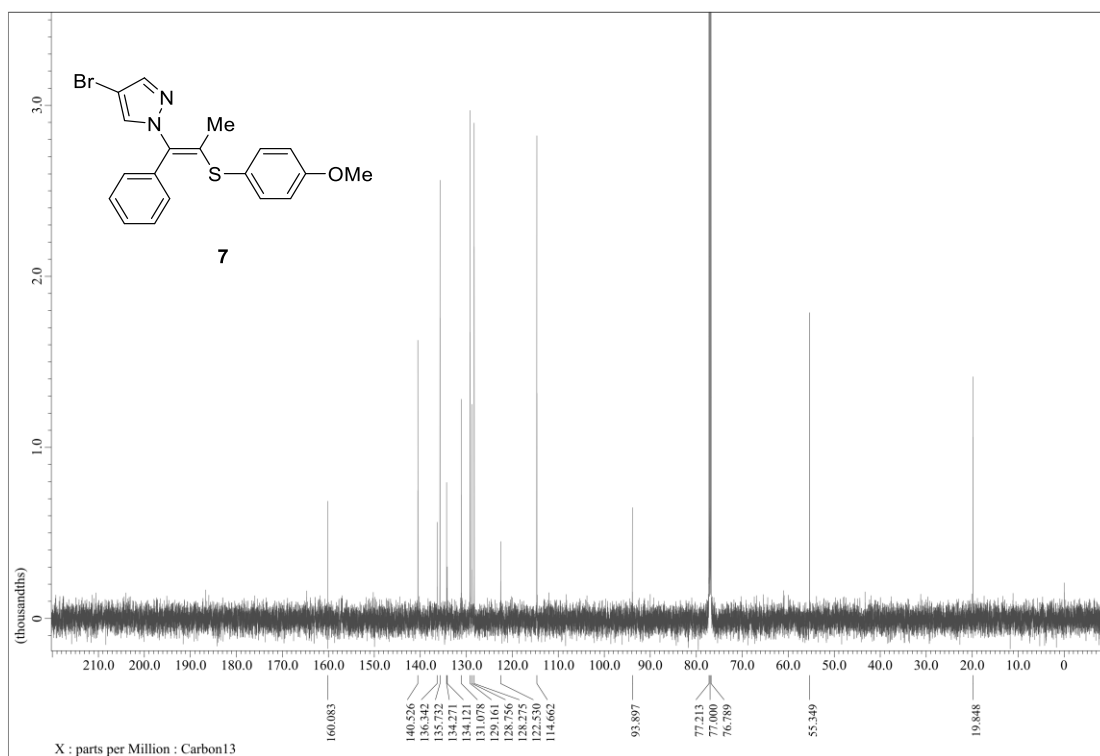

$^1\text{H}$  NMR (600 MHz,  $\text{CDCl}_3$ ) and  $^{13}\text{C}\{^1\text{H}\}$  NMR (151 MHz,  $\text{CDCl}_3$ ) spectra of **8**

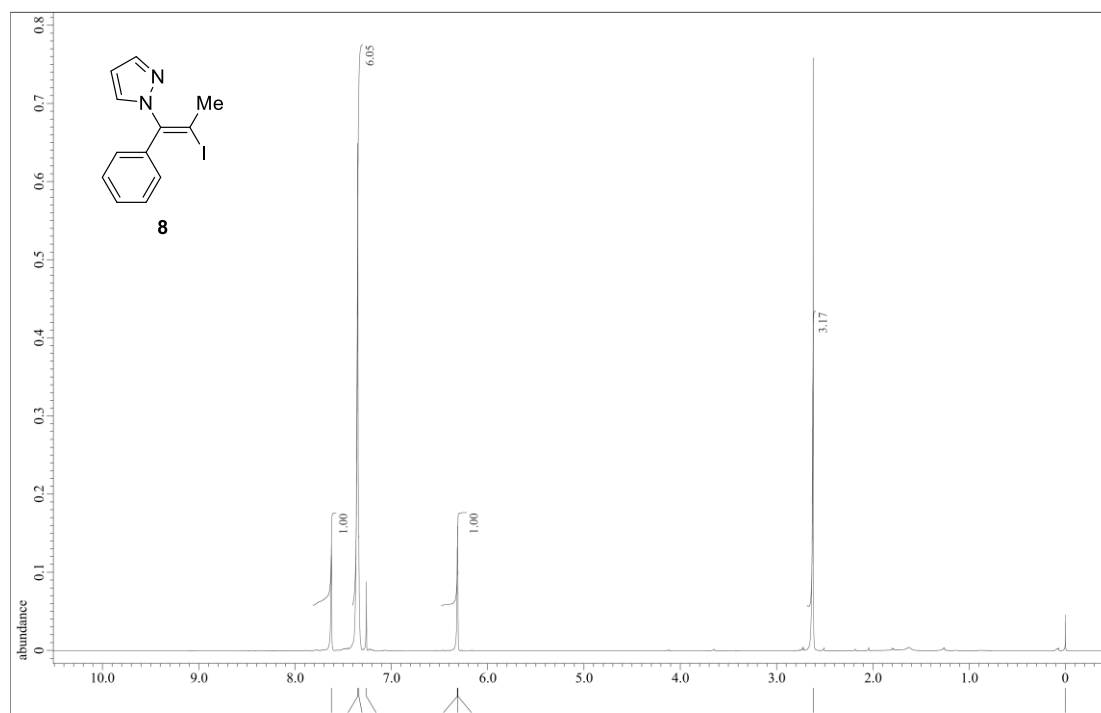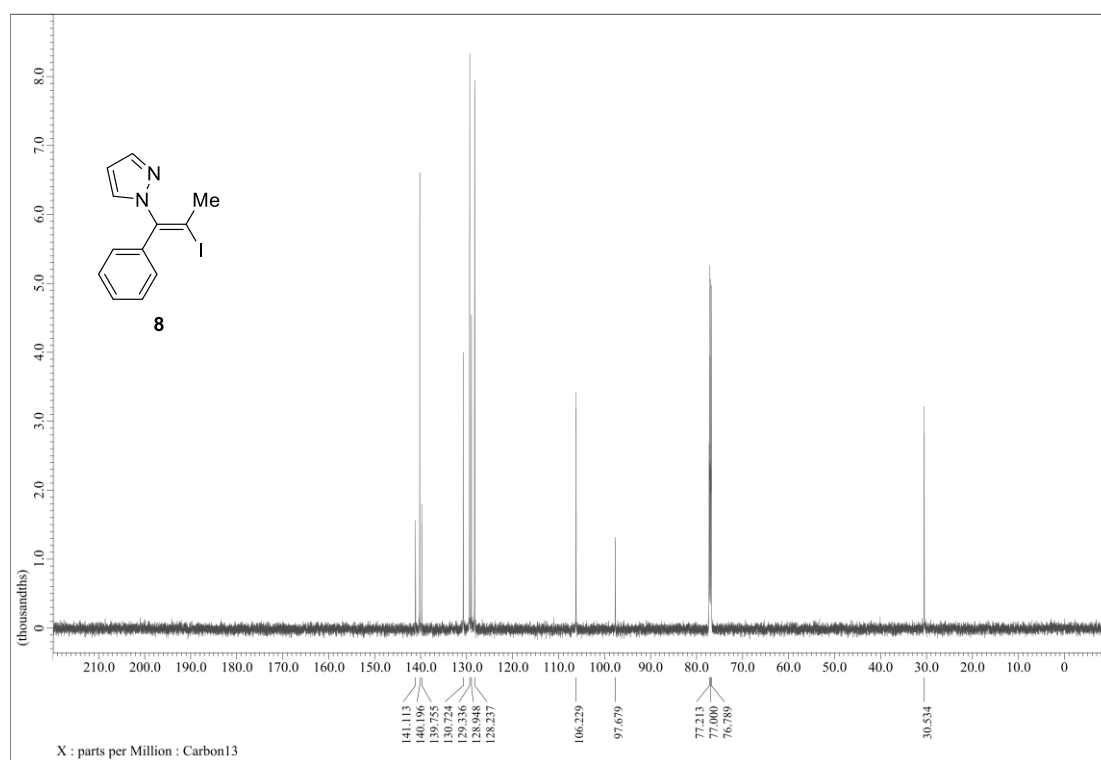

$^1\text{H}$  NMR (600 MHz,  $\text{CDCl}_3$ ) and  $^{13}\text{C}\{^1\text{H}\}$  NMR (151 MHz,  $\text{CDCl}_3$ ) spectra of **9**

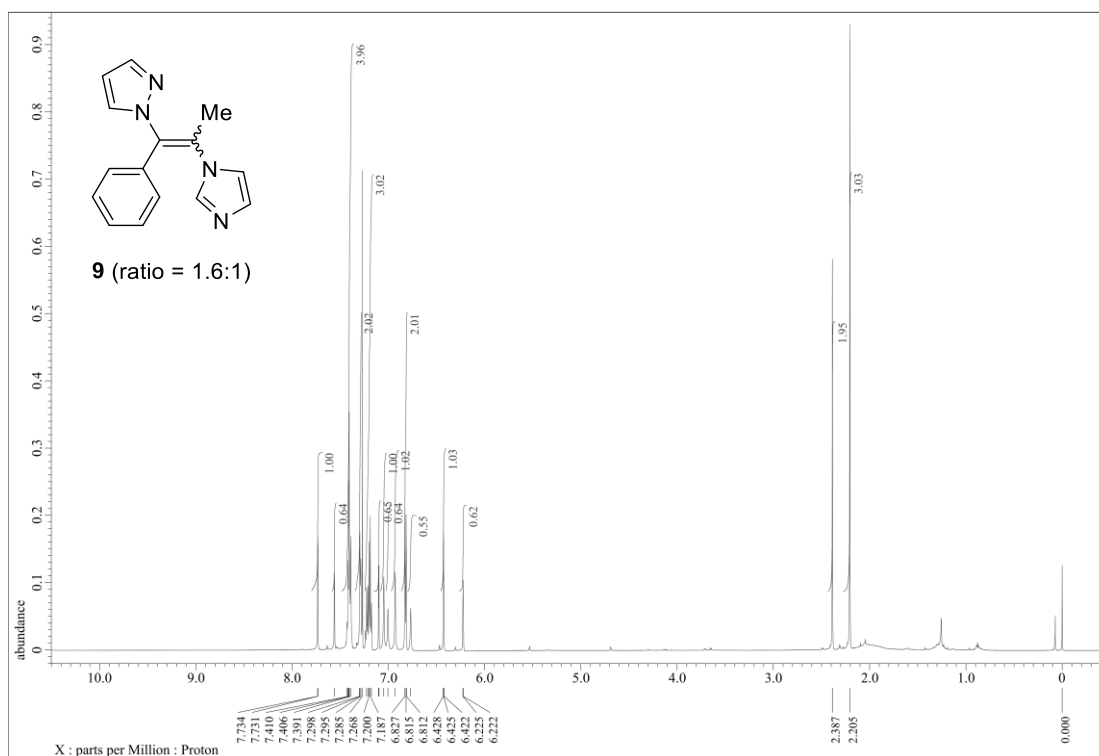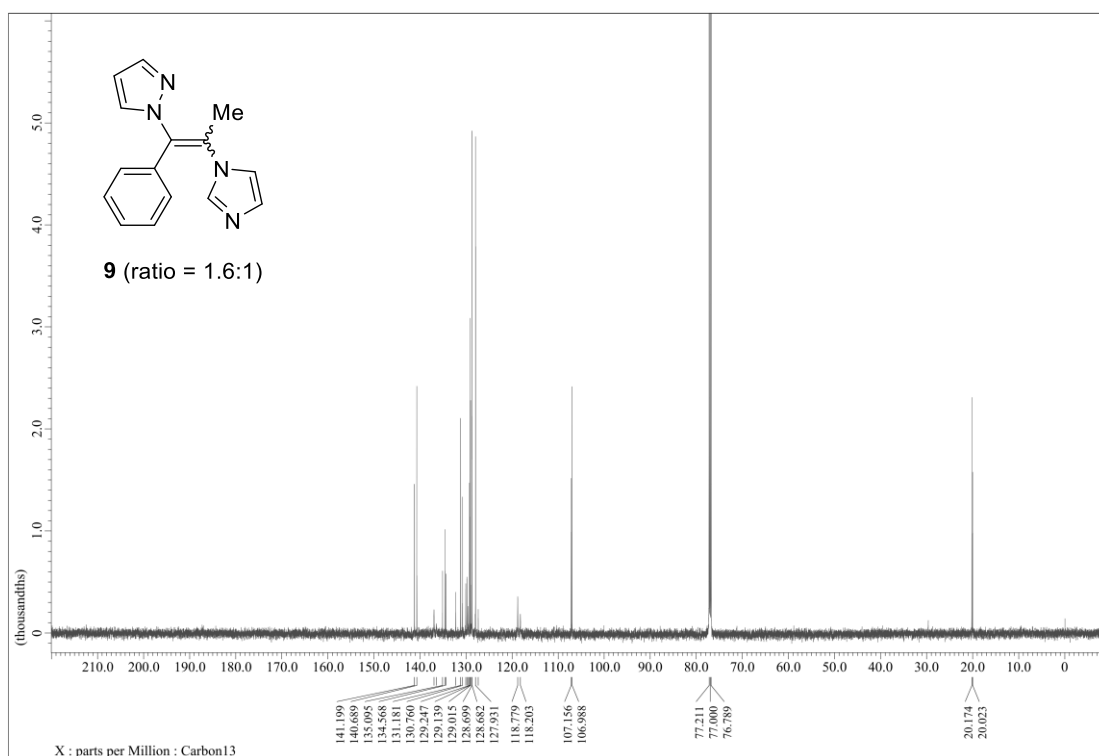

$^1\text{H}$  NMR (600 MHz,  $\text{CDCl}_3$ ) and  $^{13}\text{C}\{^1\text{H}\}$  NMR (151 MHz,  $\text{CDCl}_3$ ) spectra of **10**

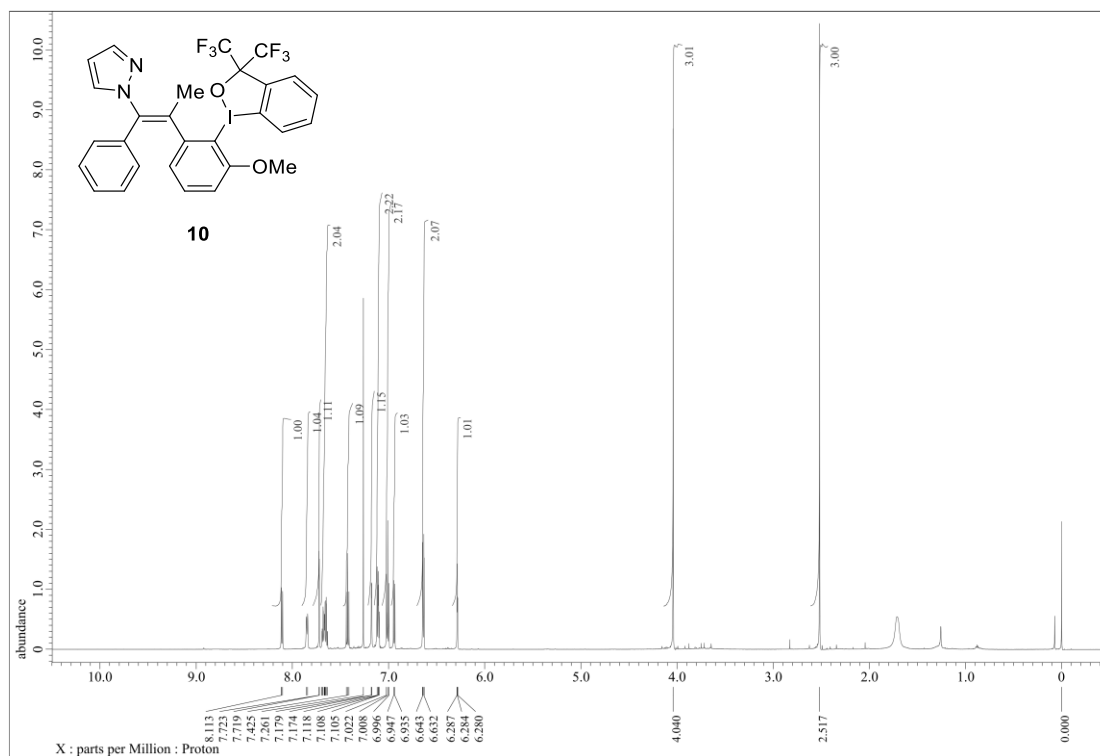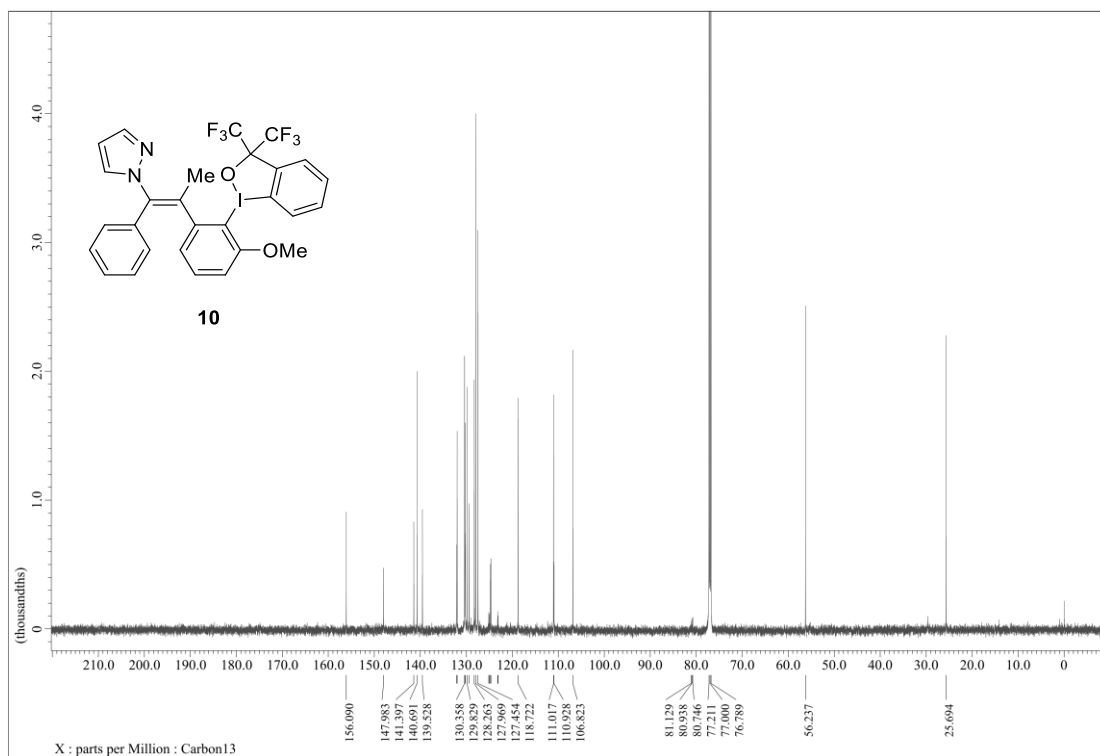

$^{19}\text{F}$  NMR (565 MHz,  $\text{CDCl}_3$ ) spectrum of **10**

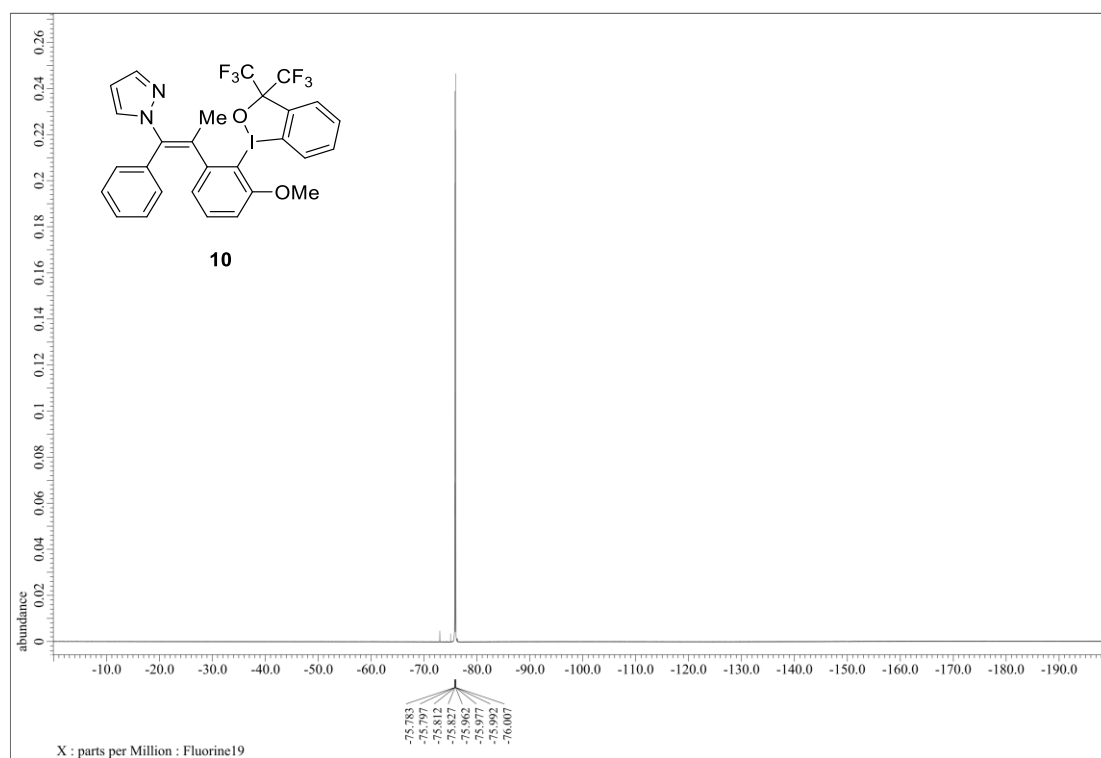

Supplement: Additional file 1 [file 1860-5397-20-79-S1.pdf]
